# Supplementary material for: A humanized mouse model of chronic COVID-19 to evaluate disease mechanisms and treatment options
Source: PubMed Central journal article supplement (PMC7987100; doi:10.21203/rs.3.rs-279341/v1), 2021-03-17
Supplement: a8351d397e318bf3cb96c982.pdf [file a8351d397e318bf3cb96c982.pdf]

# Figure S1

A.

28DPI  
Lung

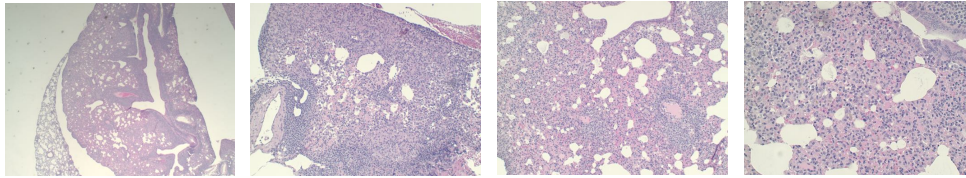

28DPI  
Lung

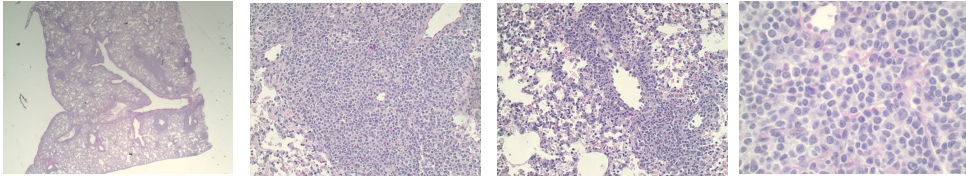

## Figure S1:

A. Histopathology by H&E staining of infected lungs at higher magnifications at 28dpi. At least 4 mice per time point were analyzed.

Figure S2

# Lymphocytes

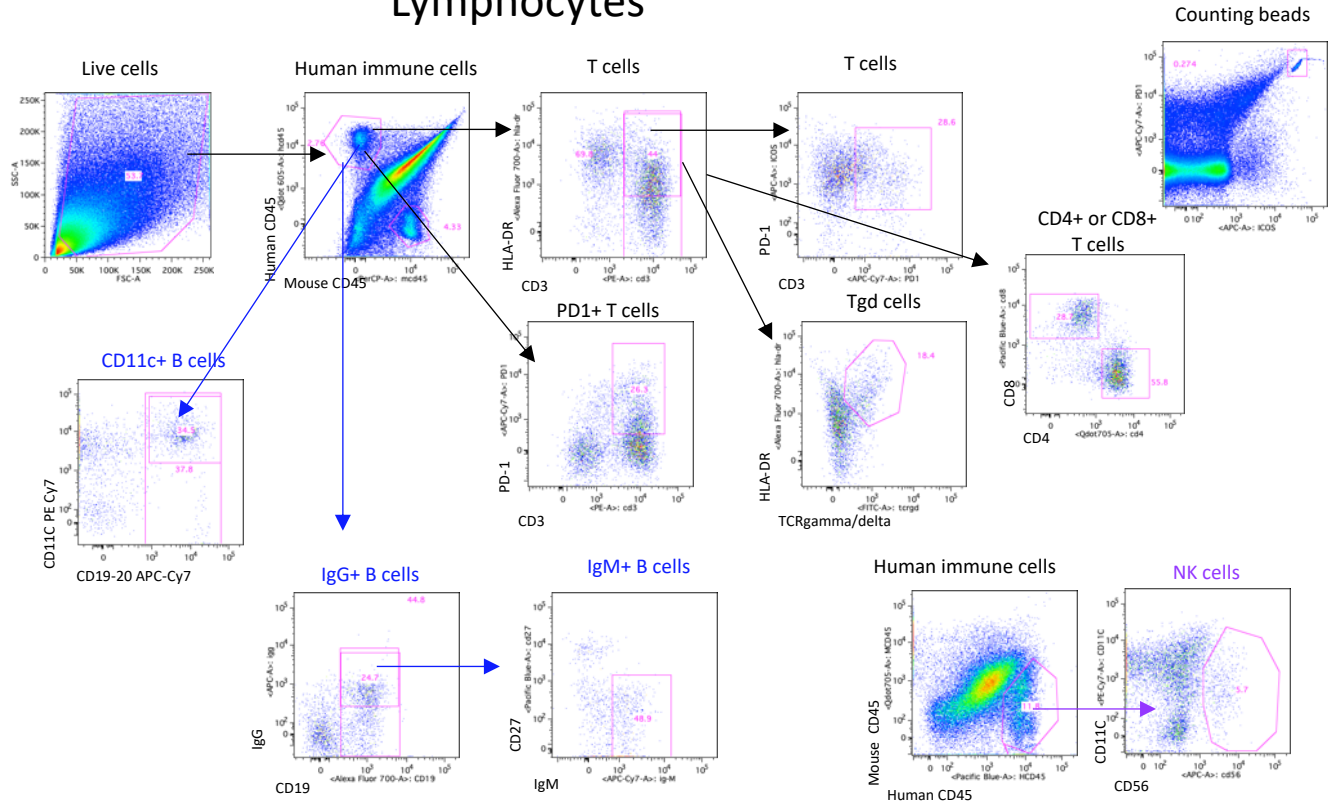

# Myeloid cells

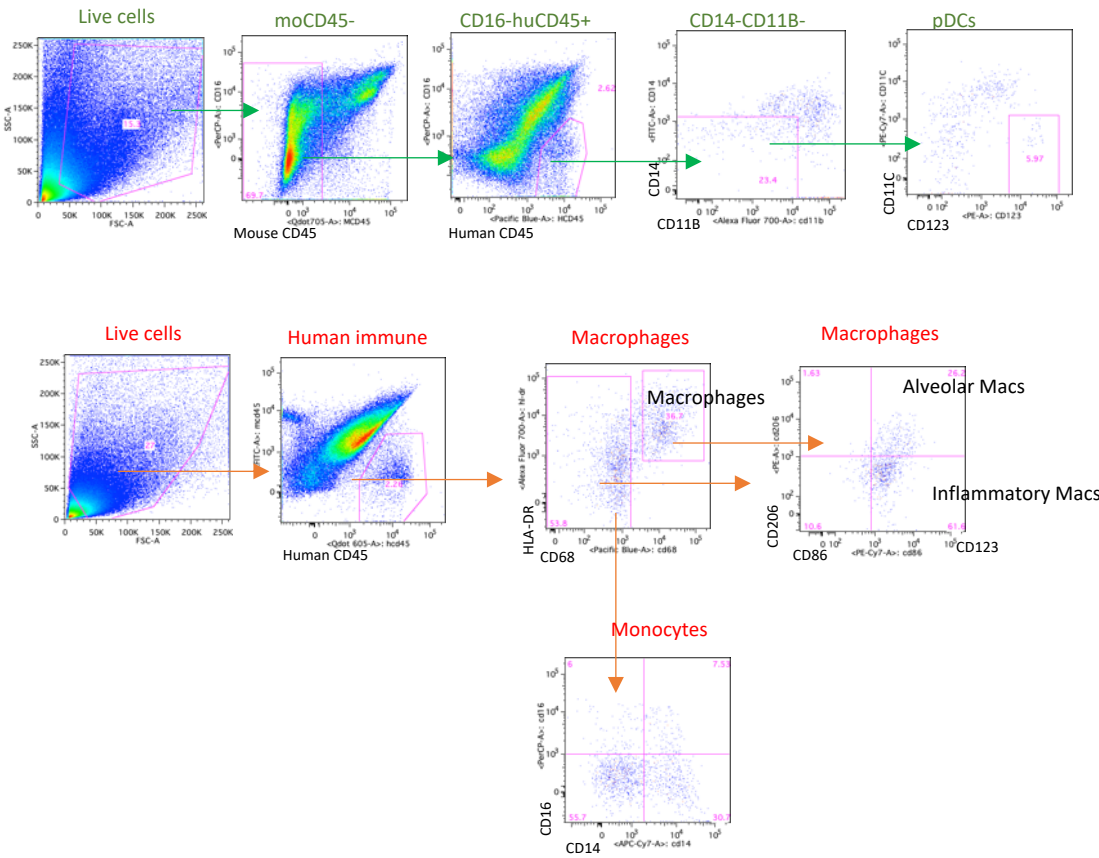

Figure S2:

Representative gating strategy of human immune cells in the lungs of infected MISTRG-hACE2 mice.

# Figure S3

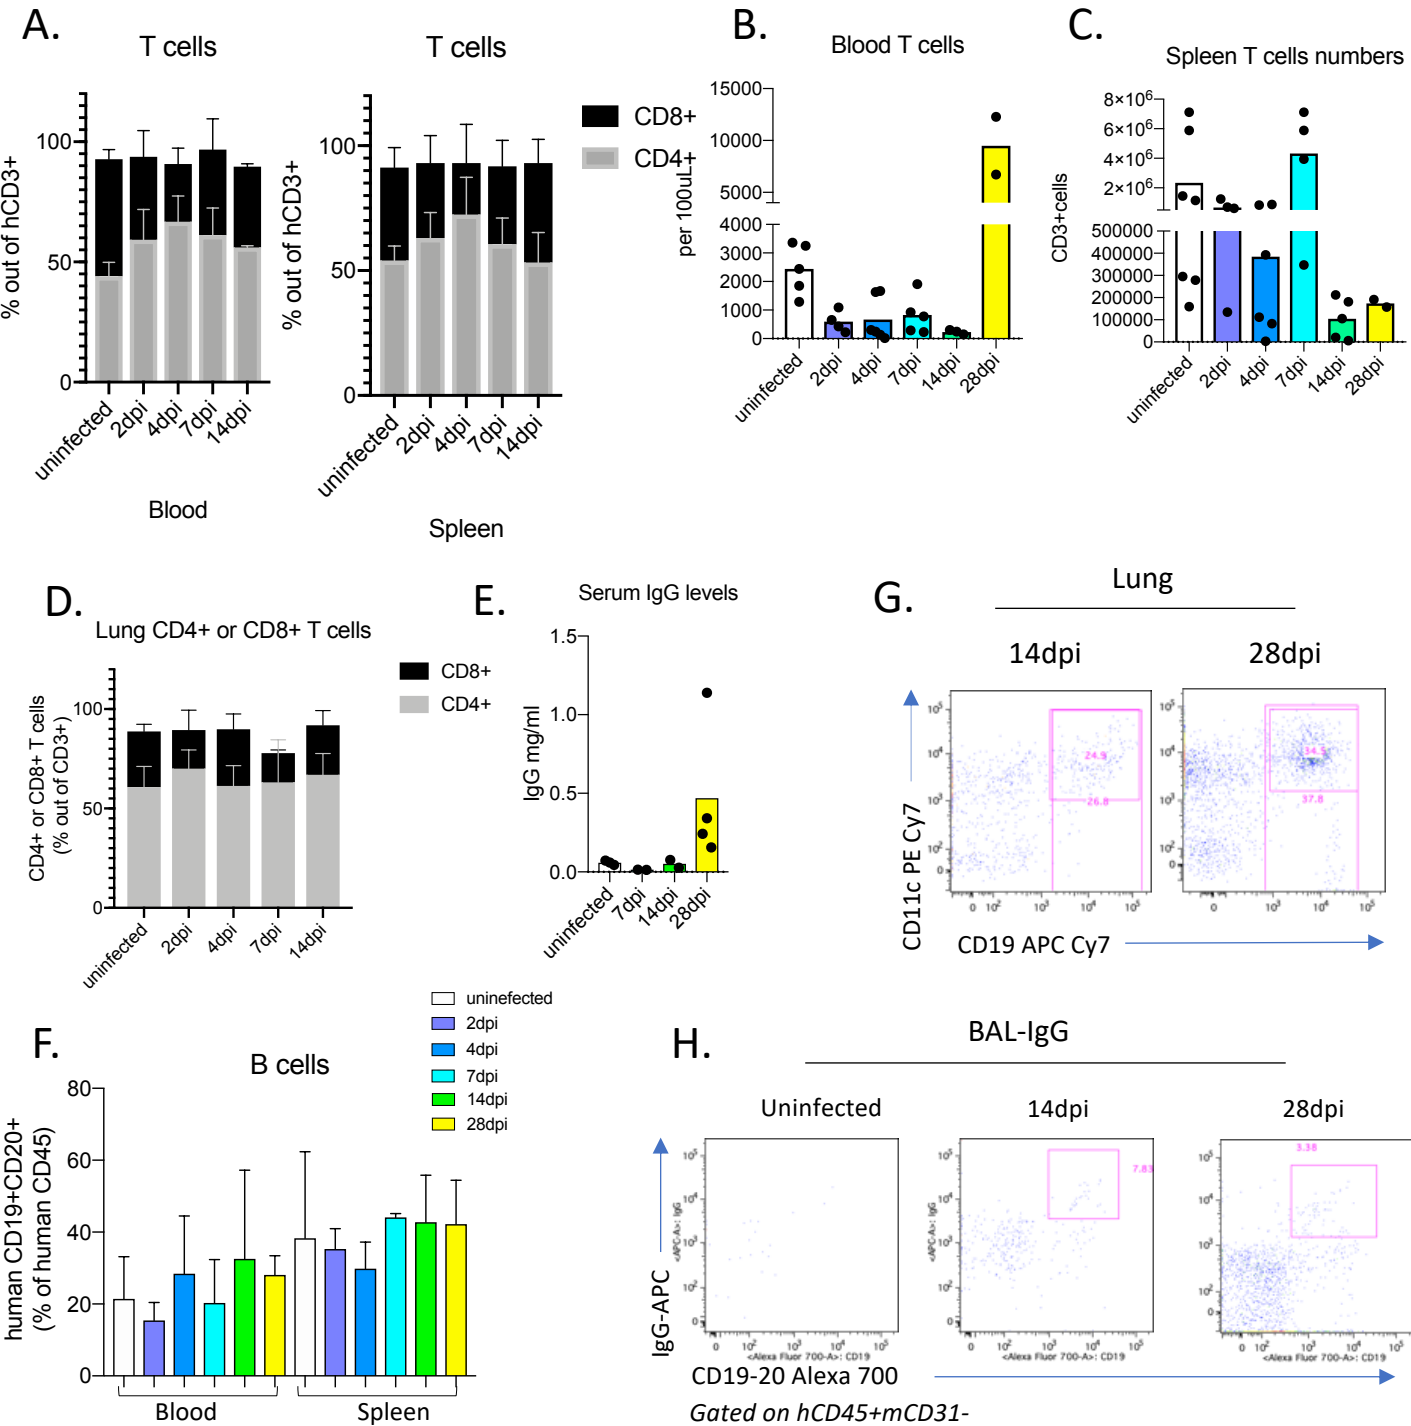

**Figure S3.**

- A. Frequencies of human CD4+ or CD8+ T cells within hCD3+ population in the blood and spleens of uninfected or infected mice at 2,4,7,14,28 dpi.
- B. Numbers of human T cells in the blood pre and post-infection (2,4,7,14,28dpi).
- C. Numbers of human T cells in the spleens of uninfected or infected mice (2,4,7,14,28dpi).
- D. Frequencies of human CD4+ or CD8+ T cells within hCD3+ population in the lungs of uninfected or infected mice at 2,4,7,14,28 dpi.
- E. IgG levels measured by ELISA in serum of uninfected or infected mice at 7,14,28 dpi.
- F. CD11C and CD19 expression on human immune cells from infected lungs at 14 and 28 dpi.
- G. Frequencies of human B cells marked by CD19 and CD20 expression within hCD45+ population in spleen and blood of uninfected or infected mice at 2,4,7,14,28 dpi.
- H. Representative flow cytometry plots and frequencies of IgG+ B cells in the BAL of uninfected and infected mice 14 and 28dpi.

Mean with SD or individual values are plotted.

Figure S4:

A. T cell bystander activation genes:

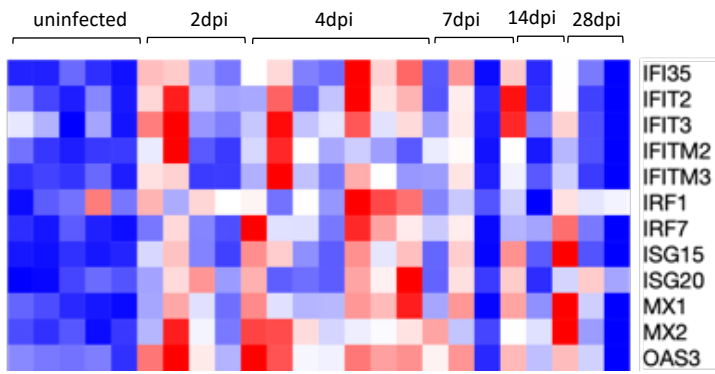

B.

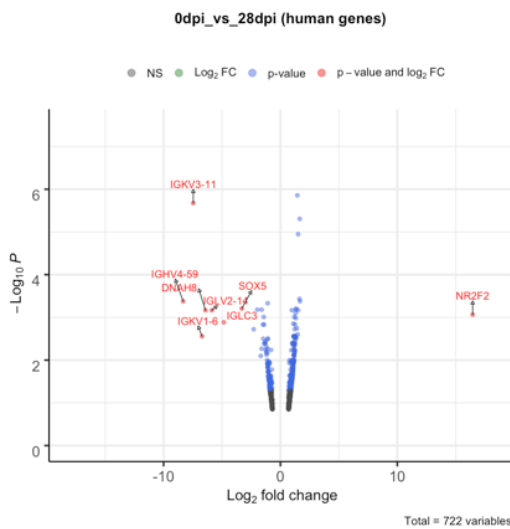

C. B cell genes upregulated in COVID patients

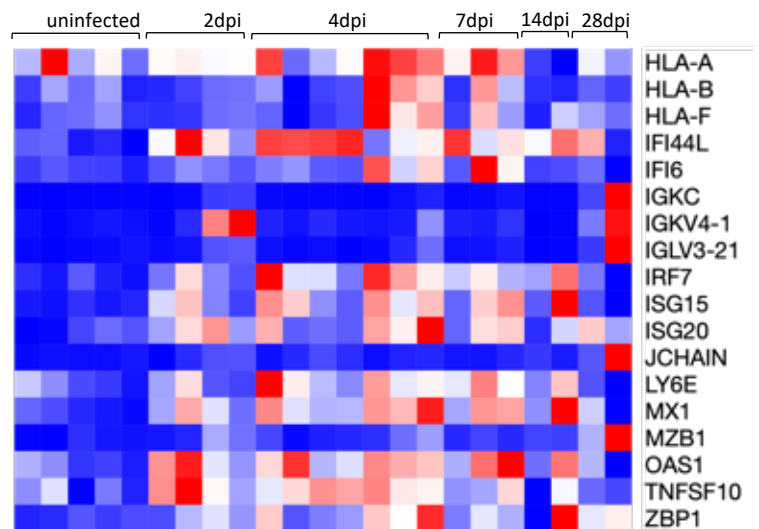

D. B cell bystander activation genes (from Influenza):

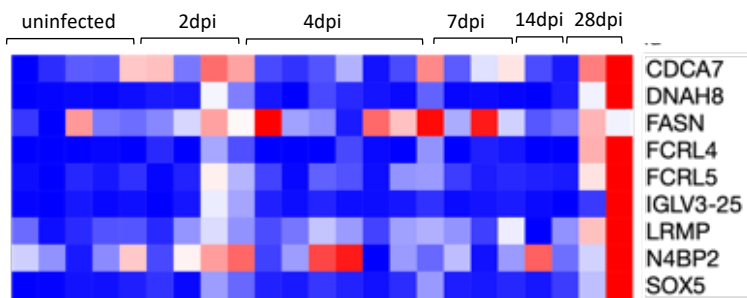

Figure S4.

- A. Heatmap of normalized counts for bystander activated memory T cell signature genes (based on (Low et al., JEM 2020)) in lungs of MISTRG6-hACE2 mice infected with SARS-CoV-2.
- B. Volcano plots showing foldchange and p values of differentially regulated genes at 28dpi compared to uninfected lungs. Genes with FC(Log2)>1 and p value<0.05 are highlighted in red. Replicates of at least 2.
- C. Heatmap of normalized counts for genes that are induced in B cells of patients with moderate or severe COVID19 in comparison with healthy controls. Normalized counts in lungs of uninfected or infected MISTRG6-hACE2 were plotted over the course of infection.
- D. Heatmap of normalized counts for bystander activated memory B cell signature genes (based on Horns et al., 2020) in lungs of MISTRG6-hACE2 mice infected with SARS-CoV-2.

Figure S5.

A.

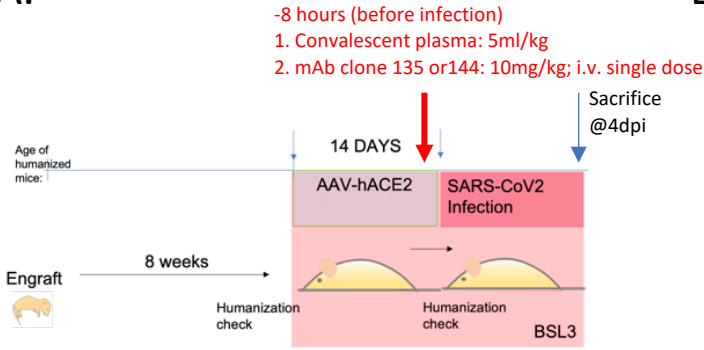

B.

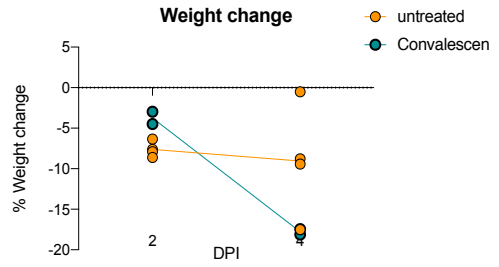

C.

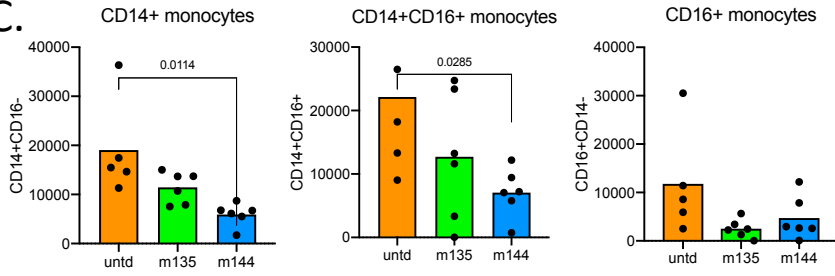

D.

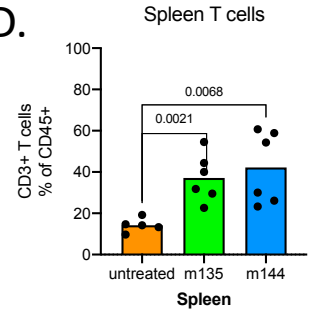

E.

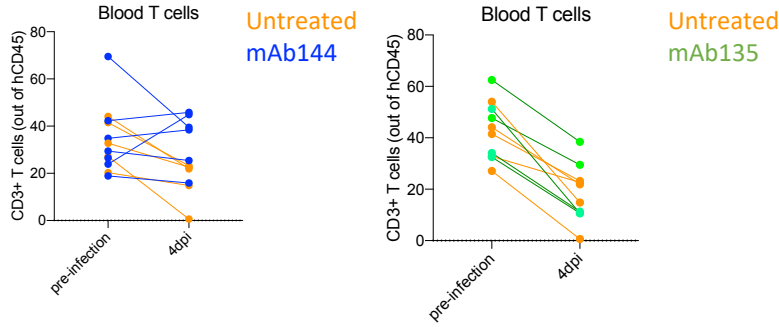

F.

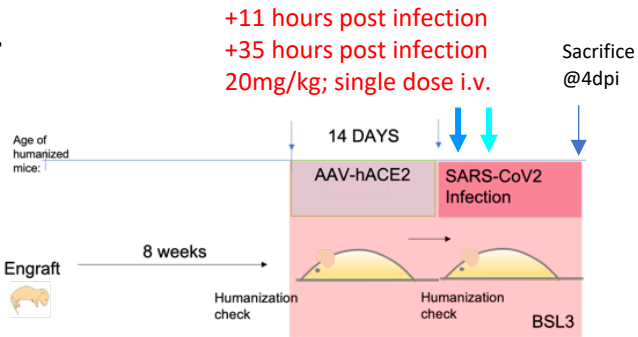

G.

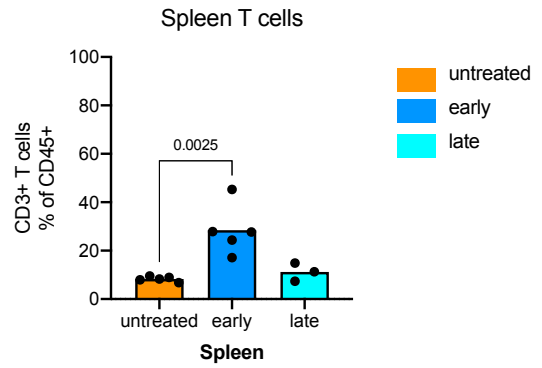

H.

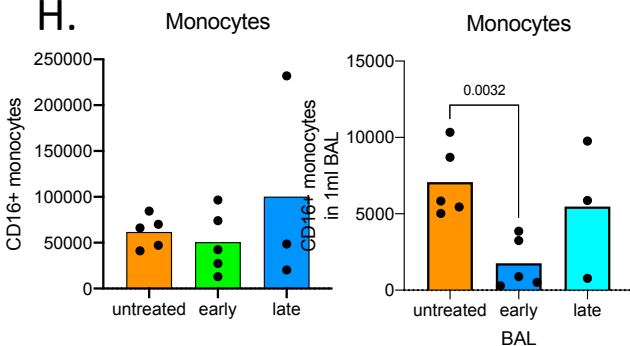

I.

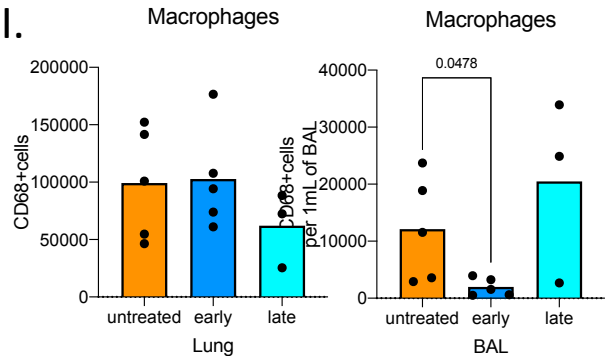

## Figure S5.

- A. Schematic of experimental design of prophylactic antibody treatment. MISTRG6-hACE2 mice received prophylactic treatment of convalescent plasma (5ml/kg) or monoclonal antibodies at 10mg/kg (clone 135 - m135 or clone 144-m144) 8 hours prior to infection or left untreated (untreated). Mice were euthanized 4dpi.
- B. Mean weight change in convalescent plasma treated mice at 2 days and 4 days post-infection plotted as percent change compared with original weight measured just before inoculation with SARS-Cov2.
- C. Frequencies of human monocytes (CD14+ classical; CD14+CD16+ intermediate, CD16+ non classical) within human CD45+ cells in the lungs of MISTRG6-hACE2 mice which received a prophylactic treatment of monoclonal antibody clone 135 (m135) or clone 144(m144) 8 hours prior to infection or left untreated (untreated). Unpaired, two-tailed t-test. P-values<0.05 are plotted. N=5-6.
- D. Frequencies of human T cells within human CD45+ cells in spleens of MISTRG6-hACE2 mice received a prophylactic treatment of monoclonal antibody clone 135 (m135) or clone 144(m144) 8 hours prior to infection or left untreated (untreated). Unpaired, two-tailed t-test. N=5-6.
- E. Frequencies of human CD3+ T cells within human CD45+ population in the blood pre and post-infection (2,4,7,14,28dpi). Lines connect pre and post-infection values for the same mouse. MISTRG6-hACE2 mice received a prophylactic treatment of monoclonal antibody clone 135 (m135) or clone 144(m144) 8 hours prior to infection or left untreated (untreated). Paired, two-tailed t-test. N=5-6. P-values<0.05 are plotted.
- F. Schematic of experimental design of post-infection mAb treatment. MISTRG6-hACE2 mice received a mixed cocktail of monoclonal antibodies clone 135 (m135) and clone 144(m144) at 20mg/kg or left untreated (untreated). Early treatment groups were treated 11 hours post-infection and late treatment 35 hours post-infection.
- G. Frequencies of human T cells within human CD45+ cells in spleens of MISTRG6-hACE2 mice that received early, late or no treatment of monoclonal antibody mix. Unpaired, two-tailed t-test. N=3-5.
- H. Number of CD16+ human monocytes in lungs of treated and untreated mice at 4dpi. Mice were either MISTRG6-hACE2 mice that received a mixed cocktail of monoclonal antibodies clone 135 (m135) and clone 144(m144) or left untreated (untreated). Early treatment groups was treated 11 hours post-infection and late treatment 35 hours post-infection. Unpaired, two-tailed t-test. N=3-5.
- I. Number of human macrophages in lungs of treated and untreated mice at 4dpi. MISTRG6-hACE2 mice that received a mixed cocktail of monoclonal antibodies clone 135 (m135) and clone 144(m144) or left untreated (untreated). Early treatment group was treated 11 hours post-infection and late treatment 35 hours post-infection. Unpaired, two-tailed t-test. N=3-5.

Pooled, infection matched representative results of at least 2 independent experiments are presented. P-values<0.05 are plotted. Mean with SD or individual values are plotted.

# Figure S6.

A.

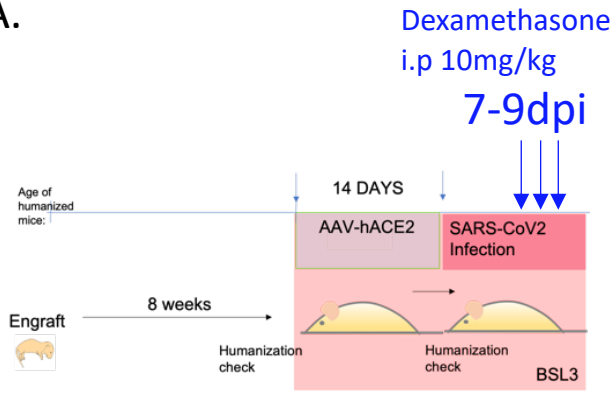

B.

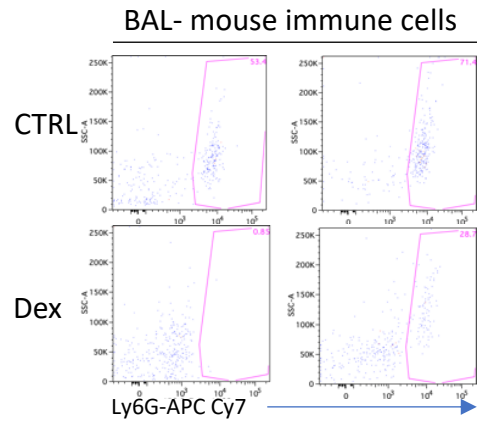

C.

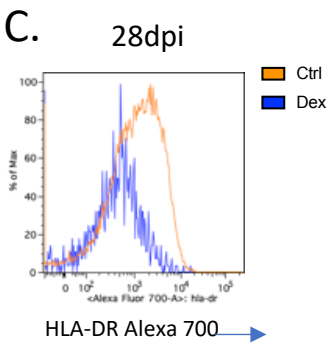

D.

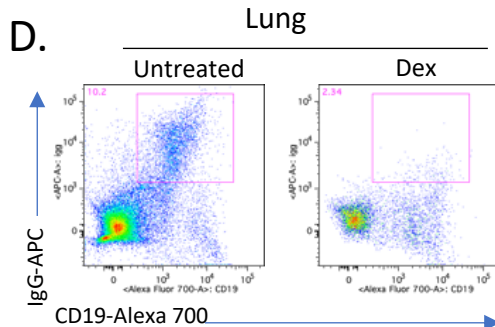

E.

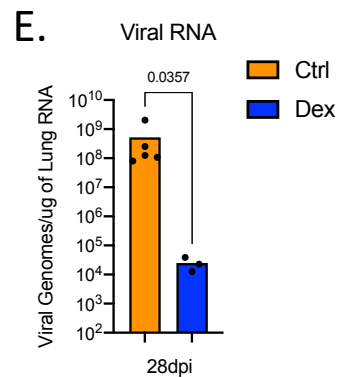

F.

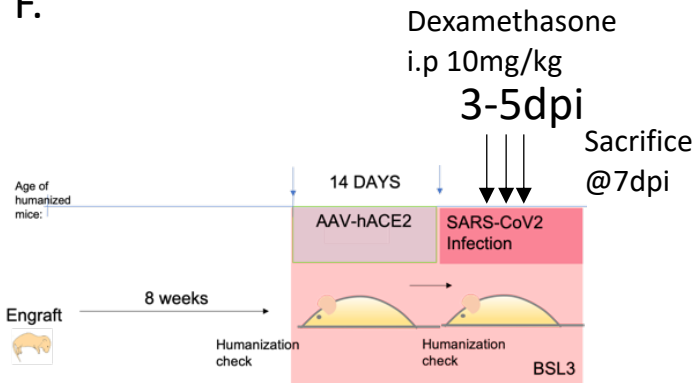

G.

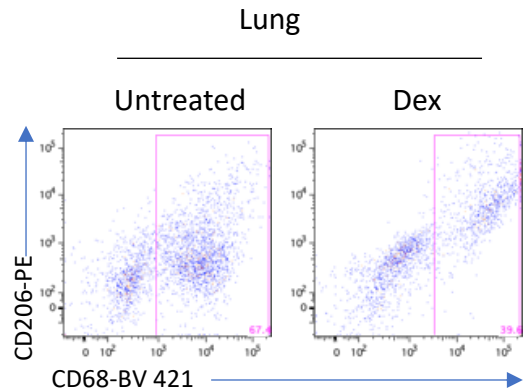

## Figure S6:

- Schematic of experimental design of SARS-Cov2 infected MISTRG6-hACE2 mice either treated with dexamethasone on days 7,8,9 dpi or left untreated.
- Representative flow cytometry plots of Ly6G expressing SSChi cells within the mouse immune cell population (mouse CD45+) in the BAL of dexamethasone treated or control mice.
- HLA-DR expression on lung T cells 28dpi in dexamethasone treated or control mice.
- Representative flow cytometry plots of Surface IgG and CD19 expression on human immune cells gated on hCD45+ cells in lungs of untreated or dexamethasone treated mice at 28dpi. N=4
- Viral RNA in the lung homogenates of dexamethasone treated or control untreated mice at 28dpi. N=3-5. Mann-Whitney, two-tailed test.
- Schematic of experimental design of SARS-Cov2 infected MISTRG6-hACE2 mice either treated with dexamethasone on days 3,4,5 dpi or left untreated.
- CD206 and CD68 expression in lung human immune cells in mice treated with dexamethasone or left untreated at 7dpi. CD206hi+ CD68+ cells are alveolar macrophages. N=4-6
