# Supplementary material for: A humanized mouse model of chronic COVID-19 to evaluate disease mechanisms and treatment options
Source: Res Sq. 2021 Mar 17:rs.3.rs-279341. Preprint. [Version 1] doi: 10.21203/rs.3.rs-279341/v1 (PMC7987100; doi:10.21203/rs.3.rs-279341/v1)
Supplement: Supplement — Table S1. Differentiyally regulated genes (DEGs) in SARS-CoV-2 infected lungs. Normalized counts, foldchanges in infected lungs compared with respect to uninfected mice and adjusted p values are presented for 516 mouse and 285 human differentially regulated genes. [file 2c8470e5216641ba27c53d3d.xlsx]

## Sheet: Human-DEGs-Ingenuity
© 2000-2021 QIAGEN. All rights reserved.
Analysis Settings
Cutoff before duplicate resolution	true
Reference set	Ingenuity Knowledge Base (Genes Only)
Relationship to include	Direct and Indirect
Includes Endogenous Chemicals	Yes
Optional Analyses	My Pathways My List
Filter Summary
Consider only molecules and/or relationships where
(confidence = Experimentally Observed) AND
(mol. types = biologic drug OR canonical pathway OR chemical - endogenous mammalian OR chemical - endogenous non-mammalian OR chemical - kinase inhibitor OR chemical - other OR chemical - protease inhibitor OR chemical drug OR chemical reagent OR chemical toxicant OR complex OR cytokine OR disease OR enzyme OR function OR fusion gene/product OR G-protein coupled receptor OR group OR growth factor…
	Ingenuity Canonical Pathways (Top 20)	-log(p-value)	Ratio	Molecules
1	Primary Immunodeficiency Signaling	6.15	0.16	BLNK,CD19,IGHA1,IGHG1,IGHG2,IGHG3,IGHM,IGLC1
2	Systemic Lupus Erythematosus In B Cell Signaling Pathway	6.03	0.0618	BLNK,CD19,CD22,IGHA1,IGHE,IGHG1,IGHM,IL6,IRAK4,IRF7,ISG20,MALT1,RASGRP3,SHC2,STAT1,TRAF4,TRAF5
3	Communication between Innate and Adaptive Immune Cells	5.76	0.104	CCL5,CXCL10,IGHA1,IGHE,IGHG1,IGHG2,IGHG3,IGHM,IL6,TLR10
4	Hematopoiesis from Pluripotent Stem Cells	5.11	0.143	IGHA1,IGHG1,IGHG2,IGHG3,IGHM,IGLC1,IL6
5	B Cell Receptor Signaling	4.61	0.0645	BLNK,CD19,CD22,EBF1,IGHA1,IGHE,IGHG1,IGHG2,IGHG3,IGHM,MALT1,PAX5
6	Pathogenesis of Multiple Sclerosis	3.59	0.333	CCL5,CXCL10,CXCL11
7	Sumoylation Pathway	3.05	0.068	FAS,ISG20,RHOB,RHOH,SENP7,SP100,ZEB1
8	Coronavirus Pathogenesis Pathway	2.72	0.0533	ACE2,CCL5,DDX58,E2F8,IL6,IRF7,SIN3A,STAT1
9	Interferon Signaling	2.71	0.111	IFI35,IFITM1,IFITM3,STAT1
10	Neuroinflammation Signaling Pathway	2.25	0.0367	BIRC3,BIRC6,CCL5,CXCL10,FAS,GDNF,IL6,IRAK4,IRF7,STAT1,TLR10
11	IL-17A Signaling in Gastric Cells	2.23	0.12	CCL5,CXCL10,CXCL11
12	Autoimmune Thyroid Disease Signaling	2.22	0.0816	FAS,IGHG1,IGHG2,IGHG3
13	IL-7 Signaling Pathway	2.21	0.0641	EBF1,IGHG1,IGHM,PAX5,STAT1
14	Activation of IRF by Cytosolic Pattern Recognition Receptors	1.84	0.0635	DDX58,IL6,IRF7,STAT1
15	Phagosome Formation	1.83	0.0451	IGHG1,IGHG2,IGHG3,RHOB,RHOH,TLR10
16	B Cell Development	1.79	0.0833	CD19,IGHM,IGLC1
17	DNA Double-Strand Break Repair by Homologous Recombination	1.75	0.143	ATRX,GEN1
18	Role of Macrophages, Fibroblasts and Endothelial Cells in Rheumatoid Arthritis	1.71	0.0319	CCL5,IGHG1,IGHG2,IGHG3,IL6,IRAK4,TCF4,TLR10,TRAF4,TRAF5
19	D-myo-inositol (1,4,5,6)-Tetrakisphosphate Biosynthesis	1.7	0.0423	DUSP16,DUSP2,DUSP5,PIKFYVE,PPP1R16B,PTPN13
20	D-myo-inositol (3,4,5,6)-tetrakisphosphate Biosynthesis	1.7	0.0423	DUSP16,DUSP2,DUSP5,PIKFYVE,PPP1R16B,PTPN13
Upstream Regulators for My Projects->covid19 c2->human_DEG-1 - 2020-11-10 09:14 PM
	Upstream Regulator (Top 10)	Molecule Type	p-value of overlap	Target molecules in dataset
1	methylprednisolone	chemical drug	9.21e-26	BLNK,CD19,CD22,DUSP2,FKBP4,GHR,HSPA1A/HSPA1B,HSPH1,IGHA1,IGHA2,IGHE,IGHG1,IGHG2,IGHG3,IGHM,IGHV1-2,IGHV1-69D,IGHV3-15,IGHV3-21,IGHV3-23,IGHV3-30,IGHV3-33,IGHV3-48,IGHV3-7,IGHV4-34,IGHV4-59,IGHV5-51,IGKC,IGKV1-16,IGKV1-17,IGKV1-5,IGKV3-11,IGKV3-15,IGKV3-20,IGKV4-1,IGLC1,IGLC2,IGLC3,IGLV1-40,IGLV1-44,IGLV1-51,IGLV2-11,IGLV2-14,IGLV2-23,IGLV2-8,IGLV3-19,IGLV3-21,IGLV3-25,IL6,IRF7,LAMA3,PDK1,PRDM1,ST…
2	IFNA2	cytokine	1.07e-16	BCL2L14,CAV1,CCL5,CXCL10,CXCL11,DDX58,FAS,GBP4,HERC6,IDO1,IFI16,IFI35,IFI44L,IFITM1,IFITM3,IL12RB2,IL6,IRF7,ISG20,MT2A,MX2,OAS3,OASL,SAMD9,SP100,STAT1,USP18,XAF1	IFNA2,IFNAR1,IFNAR2,IRF1,IRF3,IRF8,IRF9,JUN,MAPK1,MYC,NCOA2,NFKB1,NFkB (complex),PGR,RELA,STAT1,STAT2,STAT3,STAT6
3	lipopolysaccharide	chemical drug	3.14e-16	ACE2,AFF3,APOBEC3F,ASH1L,ATRX,BIRC3,BLNK,CAV1,CCL19,CCL5,CD22,CGAS,CNR2,CORO1A,CXCL10,CXCL11,DDX58,DNAJB1,DOCK10,DUSP16,DUSP2,DUSP5,EAF2,ENTPD1,FAS,FASN,FUT8,GBP4,GHR,GLCCI1,HDAC9,HIVEP1,HIVEP2,HSPA1A/HSPA1B,IDO1,IFI16,IFI35,IFI44L,IFITM1,IGHG1,IGHM,IGKC,IKZF3,IL12RB2,IL6,IRAK4,IRF4,IRF7,ISG20,JCHAIN,KLF2,LMNB1,LPIN1,MALT1,MANF,MT2A,MX2,NCOA3,NT5C3A,OAS3,OASL,PARP10,PAX5,PNOC,POU2AF1,PPP1R16B,PRD…	IFNB1,IFNG,IRF1,IRF3,IRF5,IRF7,Interferon alpha,JUN,MYC,NFKB1,NFkB (complex),RELA,STAT1,STAT2,STAT3,TNF,lipopolysaccharide
4	Interferon alpha	group	7.83e-16	APOBEC3F,CCL19,CCL5,CGAS,CXCL10,CXCL11,DDX58,EPSTI1,FAS,FASN,HELZ2,HERC6,HSPA1A/HSPA1B,IDO1,IFI16,IFI35,IFI44L,IFITM1,IFITM3,IL12RB2,IL6,IRF4,IRF7,ISG20,MX2,NT5C3A,OAS3,PARP10,PYHIN1,SAMD9,SAMD9L,SLFN13,SP100,STAP1,STAT1,USP18	CREBBP,IFNG,IRF1,IRF3,IRF5,IRF7,IRF8,IRF9,Interferon alpha,JUN,NFKB1,NFkB (complex),RELA,STAT1,STAT2,STAT3,STAT6
5	IFNL1	cytokine	1.27e-14	CXCL10,CXCL11,DDX58,HERC6,IFI35,IFI44L,IFITM1,IFITM3,IL6,ISG20,OAS3,OASL,SAMD9,SP100,STAT1,USP18,XAF1	FOXP3,IFNL1,IL4,IRF1,IRF3,IRF8,IRF9,IgG,JUN,MYC,NFKB1,RELA,STAT1,STAT2,STAT3,STAT6
6	IRF7	transcription regulator	2.13e-14	CCL19,CCL5,CXCL10,DDX58,GBP4,HELZ2,IDO1,IFI16,IFI35,IFI44L,IFITM1,IFITM3,IRF7,ISG20,MX2,NT5C3A,OAS3,OASL,SAMD9L,STAT1,USP18,XAF1	CREBBP,IFN alpha/beta,IFNA2,IFNB1,IRF1,IRF3,IRF7,IRF9,Interferon alpha,JUN,NFKB1,NFkB (complex),PML,STAT1,STAT2,STAT3,STAT6
7	MSC	transcription regulator	4.78e-11	CD19,EPSTI1,FCRL2,FCRL4,FCRL5,IFI44L,IRF7,JCHAIN,PAX5,PIEZO2,SYNE2,XAF1
8	IFNAR2	transmembrane receptor	7.04e-11	BCL2L14,CXCL10,CXCL11,DDX58,GBP4,IDO1,IFITM1,IL6,MX2,USP18,XAF1	IFNAR2,IFNG,IRF1,IRF5,IRF8,IRF9,JUN,MYC,NFKB1,RELA,STAT1,STAT2,STAT3,STAT6
9	IRF1	transcription regulator	8.69e-11	CCL19,CCL5,CXCL10,CXCL11,DDX58,HELZ2,IDO1,IFI35,IFI44L,IFITM1,IFITM3,IL12RB2,IL6,IRF4,IRF7,OAS3,OASL,STAT1,XAF1	IFN Beta,IFNG,IRF1,IRF3,IRF5,IRF7,IRF8,IRF9,JUN,MYC,NFKB1,RELA,STAT1,STAT2,STAT3,STAT6
10	PNPT1	enzyme	1.87e-10	CCL5,CXCL10,DDX58,GBP4,IFI16,IL6,IRF7,SAMD9L,STAT1,USP18,XAF1	AHR,EIF2AK2,IRF1,IRF3,IRF4,JUN,MYC,NFKB1,NFkB (complex),PNPT1,RELA,RELB,SIRT1,STAT1,STAT3
	Master Regulator (Top 10)	Molecule Type	p-value of overlap	Network bias-corrected p-value	Participating regulators	Causal network	Target-connected regulators	Relationships Between Master Regulators(Increases/Downstream)	Relationships Between Master Regulators(Decreases/Downstream)	Relationships Between Master Regulators(Affects/Downstream)	Relationships Between Master Regulators(Increases/Upstream)	Relationships Between Master Regulators(Decreases/Upstream)
1	methylprednisolone	chemical drug	5.63e-25	0.0001	methylprednisolone	50 (1)	1				B4GALNT1,IFNGR1,IL1RN,MYC,PRDM1,STAT3,XRCC1	BTK,CR2,ID3,IRF1,MAPK1,MAPK9,RELB,STAT1,SYK,TLR7,TLR9
2	IFNA2	cytokine	3.22e-16	0.0001	IFNA2	25 (1)	1	CpG ODN 2006,imiquimod,IRF3,lipopolysaccharide,poly rI:rC-RNA,STING1,TBK1,TICAM1,TICAM2,TLR7,TLR9	aldesleukin		BAK1,DDX58,EIF2AK2,IFIH1,IFIT2,IFNAR1,IFNAR2,IFNB1,IFNG,IL12 (complex),IL4,Interferon alpha,IRF1,IRF5,IRF9,ISG15,ISGF3,LILRB4,MAPK1,mir-155,PARP9,PLAAT4,PML,SOCS2,STAT,STAT1,STAT2,STAT3,STAT4,STAT5B,STAT6,TGM2,TNFRSF1A,TNFSF10,TREX1,UBE2L6,USP18	CD3,IL2RA,IL5
3	lipopolysaccharide	chemical drug	1.65e-15	0.0001	lipopolysaccharide	72 (1)	1				ADAR,ANGPTL4,APP,BCL6,BCR (complex),BTK,CD38,CD40,CD40LG,CEBPG,CGAS,COL4A2,CRLF2,DDX58,DNAJC3,DOCK8,DYRK3,EIF2AK2,ELL2,ETV6,FSCN1,GRM4,IFIH1,IFIT2,Ifn,IFN alpha/beta,IFN Beta,IFN type 1,IFNA1/IFNA13,IFNA2,IFNA4,IFNB1,IFNE,IFNG,IFNK,IFNL1,IFNL3,IFNW1,IKBKE,IL12 (complex),IL12A,IL12B,IL1RN,IL21,IL24,IL2RA,IL2RG,IL4,IL5,IL5RA,IL7R,Interferon alpha,IRF1,IRF2,IRF3,IRF4,IRF5,IRF7,IRF9,Irgm1,ISG15,lacto…	CCNF,CYP27A1,CYP4A,FES,ID3,ITGA8,PAX5,PGR,phospholipid,PTGER4,RPS14,Rxr,SIRT1,STAT5B,TKT
4	IFNL1	cytokine	5.45e-15	0.0001	IFNL1	17 (1)	1	IKBKE,IRF1,IRF3,IRF7,lipopolysaccharide,MAPK1,MAVS,PAF1,poly rI:rC-RNA,SIRT1 inhibitor III,TBK1,TICAM1,TLR9	SIRT1		CD40,EIF2AK2,IFIH1,IFIT2,IL12B,IRF9,ISG15,PML,STAT,STAT1,STAT2,STAT3,STAT4,UBE2L6,USP18	IL5
5	AFAP1-AS1	other	4.37e-14	0.0001	AFAP1-AS1,IRF7	22 (2)	2				IRF7
6	IRF7	transcription regulator	1.05e-13	0.0001	IRF7	21 (1)	1	1,2-dioleoyloxy-3-(trimethylammonium)propane,9-benzyl-8-hydroxy-2-(2-methoxyethoxy)adenine,AFAP1-AS1,APP,BAK1,bromodeoxyuridine,C11orf95-RELA,CC-122,CGAS,CLEC12A,CpG ODN 2006,decitabine,DOCK8,EBF1,ETV6-NTRK3,FADD,FZD9,Ifnar,IFNAR1,IFNG,IFNGR1,IKBKE,IL21,IL5,imiquimod,IRF3,ISGF3,lipopolysaccharide,MAP3K14,MAVS,mitoxantrone,MSC,NFATC2,oblimersen,PARP9,PIK3R2,PLAAT4,PML,poly rI:rC-RNA,PRDM1,pristane…	6-aminopyrazolopyrimidine derivative compound II,ACKR2,DETA-NONOate,ETV6-RUNX1,FSCN1,IL1RN,IL2RG,IL4,IRF2,IRF4,MAP3K7,MAPK1,MYC,PGR,PNPT1,PRDM16,PTGER4,SARM1,SATB1,SIRT1,STAT3,STAT6,sulfamethoxazole/trimethoprim,TAB1,TRIM24,ZBED2		ADAR,CD40,IFIT2,IFN type 1,IFNA10,IFNA14,IFNA16,IFNA17,IFNA21,IFNA4,IFNA7,IFNA8,IFNE,IFNK,IFNL1,IFNL3,IFNW1,ISG15,PARP14,TNFSF10,TREX1,UBE2L6
7	ADAR	enzyme	1.18e-12	0.0001	ADAR,EIF2AK2,IRF3,ZBP1	23 (4)	3	Ifn,IFN Beta,IKBKE,IRF7,lipopolysaccharide,PRL	ACKR2,MAPK1,poly rI:rC-RNA,SIRT1,ZBED2		IFNB1,SPI1	EIF2AK2
8	poly dA-dT	chemical reagent	2.35e-12	0.0001	CASP1,IRF3,poly dA-dT,STAT1	30 (4)	4				CGAS,IFN alpha/beta,IFN Beta,IFN type 1,IFNA1/IFNA13,IFNB1,IFNG,Interferon alpha,IRF3,ISG15,STAT1
9	mir-183	microRNA	4.26e-12	0.0001	IRF3,mir-183,STAT1	30 (3)	3	MYC,STAT3			DDX58,IFNB1,IRF3,ISG15,STAT1,TCF3	COMMD3-BMI1,SERPINE2
10	IFIT2	other	7.35e-12	0.0001	IFIT2,IRF3,PRKCI	21 (3)	3	APP,bromodeoxyuridine,CGAS,CLEC12A,CpG ODN 2006,DDX58,decitabine,DOCK8,FADD,IFN Beta,IFN type 1,IFNA1/IFNA13,IFNA2,Ifnar,IFNE,IFNL1,IKBKE,IL21,Interferon alpha,IRF1,IRF5,IRF7,IRF9,ISGF3,JAK,lipopolysaccharide,MAP3K7,MAVS,NFATC2,PARP9,poly rI:rC-RNA,ribavirin,SAMSN1,SASH1,SPI1,stallimycin,STAT1,STAT2,STAT4,STING1,TBK1,TGM2,TICAM1,TLR9,TNK1,TRIM38	ACKR2,Irgm1,MAPK1,MYC,NGLY1,PGR,PRDM16,PTGER4,RC3H1,STAT3,TREX1,TRIM24,ziritaxestat		EIF2AK2,IL12B,ISG15

## Sheet: Mouse DEGs-GO
Analysis Type:	PANTHER Overrepresentation Test (Released 20200728)
Annotation Version and Release Date:	GO Ontology database DOI: 10.5281/zenodo.4081749 Released 2020-10-09
Analyzed List:	upload_1 (Mus musculus)
Reference List:	Mus musculus (all genes in database)
Test Type:	FISHER
Correction:	BONFERRONI
GO biological process complete	Mus musculus - REFLIST (22265)	upload_1 (437)	upload_1 (expected)	upload_1 (over/under)	upload_1 (fold Enrichment)	upload_1 (P-value)
cellular response to interferon-beta (GO:0035458)	47	29	0.92	+	31.44	2.26e-26
positive regulation of granulocyte macrophage colony-stimulating factor production (GO:0032725)	11	6	0.22	+	27.79	0.00457
response to interferon-beta (GO:0035456)	59	32	1.16	+	27.63	4.78e-28
interleukin-1 beta production (GO:0032611)	17	8	0.33	+	23.98	0.000129
regulation of granulocyte macrophage colony-stimulating factor production (GO:0032645)	13	6	0.26	+	23.52	0.00969
interleukin-1 production (GO:0032612)	19	8	0.37	+	21.45	0.000256
regulation of ribonuclease activity (GO:0060700)	15	6	0.29	+	20.38	0.0188
response to interferon-alpha (GO:0035455)	25	9	0.49	+	18.34	0.000103
neutrophil activation (GO:0042119)	20	7	0.39	+	17.83	0.00534
positive regulation of interleukin-17 production (GO:0032740)	18	6	0.35	+	16.98	0.0443

## Sheet: Human DEGs-GO
Analysis Type:	PANTHER Overrepresentation Test (Released 20200728)
Annotation Version and Release Date:	GO Ontology database DOI: 10.5281/zenodo.4081749 Released 2020-10-09
Analyzed List:	upload_1 (Homo sapiens)
Reference List:	Homo sapiens (all genes in database)
Test Type:	FISHER
Correction:	BONFERRONI
Bonferroni count:	9106
GO biological process complete	Homo sapiens - REFLIST (20851)	upload_1 (287)	upload_1 (expected)	upload_1 (over/under)	upload_1 (fold Enrichment)	upload_1 (P-value)
glomerular filtration (GO:0003094)	14	5	0.19	+	25.95	0.0404
extracellular matrix assembly (GO:0085029)	32	7	0.44	+	15.89	0.00763
collagen fibril organization (GO:0030199)	50	9	0.69	+	13.08	0.000874
membrane biogenesis (GO:0044091)	41	7	0.56	+	12.4	0.0329
forebrain cell migration (GO:0021885)	62	8	0.85	+	9.37	0.0434
negative regulation of cellular response to growth factor stimulus (GO:0090288)	112	14	1.54	+	9.08	1.7e-05
opsonization (GO:0008228)	73	9	1	+	8.96	0.0155
peptide cross-linking (GO:0018149)	101	10	1.39	+	7.19	0.0256
phagocytosis, recognition (GO:0006910)	104	10	1.43	+	6.99	0.0326
cerebral cortex development (GO:0021987)	121	11	1.67	+	6.6	0.0176
B cell receptor signaling pathway (GO:0050853)	132	11	1.82	+	6.05	0.0385

## Sheet: Human-GSEA-2dpi
Gene Set Name for human DEGs	Description	p-value	FDR q-value
GSE1460_INTRATHYMIC_T_PROGENITOR_VS_CD4_THYMOCYTE_DN	Genes down-regulated in comparison of intrathymic T progenitor cells (ITTP) versus CD4 [GeneID=920] thymocytes.	6.86e-09	1.74e-05
GSE4748_CTRL_VS_LPS_STIM_DC_3H_UP	Genes up-regulated in monocyte-derived dendritic cells: untreated versus LPS (3h).	7.13e-09	1.74e-05
GSE3982_DC_VS_TH2_DN	Genes down-regulated in comparison of dendritic cells (DC) versus Th2 cells.	1.57e-07	0.000113
GSE17721_0.5H_VS_24H_CPG_BMDC_DN	Genes down-regulated in comparison of dendritic cells (DC) stimulated with CpG DNA (TLR9 agonist) at 0.5 h versus those stimulated with CpG DNA (TLR9 agonist) at 24 h.	1.62e-07	0.000113
GSE2405_0H_VS_3H_A_PHAGOCYTOPHILUM_STIM_NEUTROPHIL_UP	Genes up-regulated in polymorphonuclear leukocytes (3h): control versus infection by A. phagocytophilum.	1.62e-07	0.000113
GSE3982_CTRL_VS_LPS_48H_DC_DN	Genes down-regulated in comparison of untreated dendritic cells (DC) versus DCs treated with LPS (TLR4 agonist) at 48 h.	1.62e-07	0.000113
GSE3982_DC_VS_CENT_MEMORY_CD4_TCELL_DN	Genes down-regulated in comparison of dendritic cells (DC) versus central memory CD4 [GeneID=920] T cells.	1.62e-07	0.000113
GSE29618_BCELL_VS_MONOCYTE_DAY7_FLU_VACCINE_UP	Genes up-regulated in comparison of B cells from influenza vaccinee at day 7 versus monocytes from influenza vaccinee at day 7.	2.74e-06	0.000858
GSE22886_NAIVE_BCELL_VS_MONOCYTE_UP	Genes up-regulated in comparison of naive B cells versus day 0 monocytes.	2.91e-06	0.000858
GSE17721_CTRL_VS_GARDIQUIMOD_12H_BMDC_DN	Genes down-regulated in comparison of control dendritic cells (DC) at 12 h versus those stimulated with Gardiquimod (TLR7 agonist) at 12 h.	2.99e-06	0.000858

## Sheet: Human-GSEA-4dpi
Gene Set Name for human DEGs	Description	p-value	FDR q-value
GSE4748_CTRL_VS_LPS_STIM_DC_3H_UP	Genes up-regulated in monocyte-derived dendritic cells: untreated versus LPS (3h).	1.31e-17	6.37e-14
GSE2405_HEAT_KILLED_LYSATE_VS_LIVE_A_PHAGOCYTOPHILUM_STIM_NEUTROPHIL_24H_UP	Genes up-regulated in polymorphonuclear leukocytes (24h): treated by heat killed HC60 cell (promyelocytic leukemia) lysate versus A. phagocytophilum infection.	2.81e-16	6.85e-13
GSE2405_0H_VS_3H_A_PHAGOCYTOPHILUM_STIM_NEUTROPHIL_UP	Genes up-regulated in polymorphonuclear leukocytes (3h): control versus infection by A. phagocytophilum.	1.06e-13	1.72e-10
GSE21379_WT_VS_SAP_KO_TFH_CD4_TCELL_UP	Genes up-regulated in CD4 [GeneID=920] follicular helper T cells (Tfh) with SH2D1A [GeneID=4068] knockout versus wildtype Tfh cells.	2.95e-11	2.88e-08
GSE2405_0H_VS_1.5H_A_PHAGOCYTOPHILUM_STIM_NEUTROPHIL_UP	Genes up-regulated in polymorphonuclear leukocytes (1.5h): control versus infection by A. phagocytophilum.	2.95e-11	2.88e-08
GSE6259_CD4_TCELL_VS_CD8_TCELL_UP	Genes up-regulated in T cells: CD4 [GeneID=920] versus CD8.	2.01e-10	1.63e-07
GSE22886_NAIVE_BCELL_VS_MONOCYTE_UP	Genes up-regulated in comparison of naive B cells versus day 0 monocytes.	3.67e-10	2.51e-07
GSE1460_CD4_THYMOCYTE_VS_THYMIC_STROMAL_CELL_DN	Genes down-regulated in comparison of CD4 [GeneID=920] thymocytes versus thymic stromal cells.	4.12e-10	2.51e-07
GSE17721_LPS_VS_PAM3CSK4_1H_BMDC_DN	Genes down-regulated in comparison of dendritic cells (DC) stimulated with LPS (TLR4 agonist) at 1 h versus DC cells stimulated with Pam3Csk4 (TLR1/2 agonist) at 1 h.	5.58e-09	2.87e-06
GSE27670_CTRL_VS_BLIMP1_TRANSDUCED_GC_BCELL_DN	Genes down-regulated in germinal center B lymphocytes: control versus over-expressing PRDM1 [GeneID=639].	5.88e-09	2.87e-06

## Sheet: Human-GSEA-7dpi
There were no significant hits for 7dpi vs uninfected comparison

## Sheet: Human-GSEA-14dpi
Gene Set Name for human DEGs	Description	p-value	FDR q-value
GSE29618_MONOCYTE_VS_PDC_DN	Genes down-regulated in comparison of monocytes versus plasmacytoid dendritic cells (pDC).	1.33e-10	6.48e-07
GSE6259_CD4_TCELL_VS_CD8_TCELL_UP	Genes up-regulated in T cells: CD4 [GeneID=920] versus CD8.	3.63e-09	8.84e-06
GSE29618_PDC_VS_MDC_UP	Genes up-regulated in comparison of plasmacytoid dendritic cells (DC) versus myeloid DCs.	1.79e-07	0.000116
GSE20715_0H_VS_24H_OZONE_TLR4_KO_LUNG_UP	Genes up-regulated in comparison of lung tissue from wild type mice subjected to ozone for 0 h versus that from TLR4 [GeneID=7099] deficient mice subjected to ozone for 24 h.	1.84e-07	0.000116
GSE29618_MONOCYTE_VS_PDC_DAY7_FLU_VACCINE_DN	Genes down-regulated in comparison of monocytes from influenza vaccinee at day 7 post-vaccination versus plasmacytoid dendritic cells (mDC) at day 7 post-vaccination.	1.84e-07	0.000116
GSE29618_PDC_VS_MDC_DAY7_FLU_VACCINE_UP	Genes up-regulated in comparison of plasmacytoid dendritic cells (DC) from influenza vaccinee at day 7 post-vaccination versus myeloid DCs at day 7 post-vaccination.	1.84e-07	0.000116
GSE2405_HEAT_KILLED_LYSATE_VS_LIVE_A_PHAGOCYTOPHILUM_STIM_NEUTROPHIL_24H_UP	Genes up-regulated in polymorphonuclear leukocytes (24h): treated by heat killed HC60 cell (promyelocytic leukemia) lysate versus A. phagocytophilum infection.	1.9e-07	0.000116
GSE4748_CTRL_VS_LPS_STIM_DC_3H_UP	Genes up-regulated in monocyte-derived dendritic cells: untreated versus LPS (3h).	1.9e-07	0.000116
GSE29618_BCELL_VS_PDC_DAY7_FLU_VACCINE_DN	Genes down-regulated in comparison of B cells from influenza vaccinee at day 7 post-vaccination versus plasmacytoid dendritic cells (pDC) at day 7 post-vaccination.	4.95e-06	0.00158
GSE29618_BCELL_VS_PDC_DN	Genes down-regulated in comparison of B cells versus plasmacytoid dendritic cells (pDC) .	4.95e-06	0.00158

## Sheet: Human-GSEA-28dpi
Gene Set Name for human DEGs	Description	p-value	FDR q-value
GSE29618_BCELL_VS_MONOCYTE_UP	Genes up-regulated in comparison of B cells versus monocytes.	2.48e-14	1.21e-10
GSE10325_LUPUS_CD4_TCELL_VS_LUPUS_BCELL_DN	Genes down-regulated in comparison of systemic lupus erythematosus CD4 [GeneID=920] T cells versus systemic lupus erythematosus B cells.	7.28e-11	1.77e-07
GSE32901_NAIVE_VS_TH17_NEG_CD4_TCELL_UP	Genes up-regulated in CD4 [GeneID=920] T cells: naÔve versus Th17 negative.	1.24e-09	1.62e-06
GSE29614_DAY3_VS_DAY7_TIV_FLU_VACCINE_PBMC_DN	Genes down-regulated in comparison of peripheral blood mononuclear cells (PBMC) from TIV influenza vaccinee at day 3 post-vaccination versus those at day 7 post-vaccination.	2.58e-09	1.62e-06
GSE29617_DAY3_VS_DAY7_TIV_FLU_VACCINE_PBMC_2008_DN	Genes down-regulated in comparison of peripheral blood mononuclear cells (PBMC) from TIV influenza vaccinee at day 3 post-vaccination versus those at day 7 post-vaccination.	2.68e-09	1.62e-06
GSE4984_UNTREATED_VS_GALECTIN1_TREATED_DC_DN	Genes down-regulated in monocyte-derived dendritic cells: control versus treated with LGALS1 [GeneID=3956].	2.68e-09	1.62e-06
GSE29618_BCELL_VS_MDC_DAY7_FLU_VACCINE_UP	Genes up-regulated in comparison of B cells from influenza vaccinee at day 7 post-vaccination versus myeloid dendritic cells (mDC) at day 7 post-vaccination.	2.78e-09	1.62e-06
GSE29614_CTRL_VS_DAY7_TIV_FLU_VACCINE_PBMC_DN	Genes down-regulated in comparison of peripheral blood mononuclear cells (PBMC) from TIV influenza vaccinee pre-vaccination versus those from day 7 post-vaccination.	2.99e-09	1.62e-06
GSE4748_CYANOBACTERIUM_LPSLIKE_VS_LPS_AND_CYANOBACTERIUM_LPSLIKE_STIM_DC_3H_UP	Genes up-regulated in monocyte-derived dendritic cells: LPS like antigen from O. planktothrix (3h) versus LPS and LPS like antigen from O. planktothrix (3h).	2.99e-09	1.62e-06
GSE10325_CD4_TCELL_VS_BCELL_DN	Genes down-regulated in comparison of healthy CD4 [GeneID=920] T cells versus healthy CD19 [GeneID=920] B cells.	1.08e-07	4.22e-05
