# Supplementary material for: A humanized mouse model of chronic COVID-19 to evaluate disease mechanisms and treatment options
Source: Res Sq. 2021 Mar 17:rs.3.rs-279341. Preprint. [Version 1] doi: 10.21203/rs.3.rs-279341/v1 (PMC7987100; doi:10.21203/rs.3.rs-279341/v1)
Supplement: Supplement — Table S2: Pathway analysis of mouse and human DEGs in SARS-CoV-2 infected lungs utilizing Gene Ontology(GO), Gene Set Enricment Analysis (GSEA) and Ingenuity pathway analysis platforms. [file 6ad4de51eba0d11ed2799d33.xlsx]

## Sheet: Table 2_IRS genes
	normalized count																									log2FoldChange (uninfected/ dayspost infected) and adjusted p value
Days post infection (dpi)	2dpi	2dpi	2dpi	2dpi	4dpi	4dpi	4dpi	4dpi	4dpi	4dpi	4dpi	4dpi	4dpi	7dpi	7dpi	7dpi	14dpi	14dpi	28dpi	28dpi	uninfected	uninfected	uninfected	uninfected	uninfected	28dpi	28dpi	14dpi	14dpi	7dpi	7dpi	4dpi	4dpi	2dpi	2dpi
name	Sample_1732_Lung_2dpi	Sample_1733_Lung_2dpi	Sample_1900_Lung_2dpi	Sample_1901_Lung_2dpi	Sample_1734_Lung_4dpi	Sample_1735_Lung_4dpi	Sample_1737_Lung_4dpi	Sample_1738_Lung_4dpi	Sample_1765_Lung_4dpi	Sample_1761_Lung_4dpi	Sample_1766_Lung_4dpi	Sample_1926_Lung_4dpi	Sample_1925_Lung_4dpi	Sample_1736_Lung_7dpi	Sample_1905_Lung_7dpi	Sample_1904_Lung_7dpi	Sample_1739_Lung_14dpi	Sample_1740_Lung_14dpi	Sample_2021_Lung_28dpi	Sample_2020_Lung_28dpi	Sample_1720_Lung_uninfected	Sample_1721_Lung_uninfected	Sample_2025_Lung_uninfected	Sample_1906_Lung_uninfected	Sample_1894_Lung_uninfected	log2FoldChange_uninf/28dpi	padj_28dpi	log2FoldChange_uninf/14dpi	padj_14dpi	log2FoldChange_uninf/7dpi	padj_7dpi	log2FoldChange_uninf/4dpi	padj_4dpi	log2FoldChange_uninf/2dpi	_2dpi
ACE2	13.2162	7.17013	3.16843	0	11.8137	132.914	50.359	26.5781	0.838849	15.3369	3.01121	55.303	33.0936	2.44161	39.3624	76.5855	9.77383	31.371	1.13213	0	0	0	0	0	1.81107	-0.0920339	0.727474	-0.290062	0.260457	-5.51121	0.010499	-1.85666	0.0162934	-0.168282	0.346787
AKAP12	95.8178	59.7511	16.6343	14.0033	28.6904	95.8721	54.5556	39.2894	1768.17	34.3255	724.699	45.2479	35.6393	19.5329	70.3361	83.4695	195.477	64.3931	23.2087	19.862	29.5573	12.6586	16.6601	19.704	19.9218	0.0762288	0.896544	-0.444342	0.151723	-0.0139947	1	-1.53069	0.0232851	-0.197658	0.557459
AMOTL2	46.2568	10.7552	1.58422	2.91735	3.37534	32.6837	20.9829	3.46671	367.176	5.1123	224.837	5.02754	1.69711	3.66241	6.45286	6.02358	19.5477	37.9754	2.83033	0.39724	0.671757	0	4.99804	1.03705	1.81107	0.0611231	0.879564	-1.25908	0.0405958	-0.00979995	1	-2.86245	0.00632427	-0.552639	0.0735782
ARHGAP42	62.7772	43.0208	27.7238	39.6759	33.7534	43.5782	58.7522	34.6671	284.61	12.4156	190.822	10.0551	14.8497	26.8577	20.6491	24.9548	39.0953	31.371	26.6051	31.7792	13.4351	0	19.9921	16.5928	19.9218	-0.308485	0.522105	-0.365119	0.276196	-0.0161045	1	-1.93474	0.00511661	-0.99297	0.0259406
ARNT2	19.8244	20.3154	6.33687	5.25123	20.2521	15.2524	4.19658	2.31114	445.189	2.92132	172.754	2.51377	15.6983	6.10402	10.9699	6.02358	9.77383	21.4644	6.22672	5.56137	0.671757	6.32932	3.33202	2.59263	5.43322	0.0401061	0.945149	-0.282437	0.335836	-0.00765039	1	-2.04343	0.0119768	-0.452964	0.139731
BAALC	23.1284	8.36515	7.92109	3.50082	8.43836	45.7572	16.7863	6.93343	26.8432	8.03362	27.324	8.7982	1.27283	2.44161	3.22643	1.72102	39.0953	54.4865	2.26426	1.19172	2.01527	4.74699	4.99804	5.70379	0	0.286492	NA	-0.768677	0.0541466	0.00540704	1	-1.31696	0.0355674	-0.132287	0.788817
BLNK	151.987	99.1868	184.561	150.535	111.386	139.45	205.633	190.669	65.4303	86.1788	152.011	207.386	170.135	115.976	120.023	164.358	224.798	277.386	241.144	353.941	108.825	118.675	84.9666	76.7419	112.287	-1.26968	0.00361777	-0.579026	0.0848508	-0.0194035	1	-0.038835	0.921755	-0.160271	0.733451
CACNA1H	26.4325	5.97511	0.792109	1.75041	25.3151	10.8946	8.39317	2.31114	67.2278	4.38197	77.1763	2.51377	14.8497	1.2208	14.1963	1.72102	19.5477	9.90663	3.39639	25.8206	0	0	0	0.518526	21.7329	-0.226719	NA	-0.272309	0.285019	-0.00952312	1	-1.83085	0.0218021	-0.290438	0.198767
CAV2	26.4325	13.1452	0.792109	0.583469	8.43836	28.3259	8.39317	1.15557	291.081	0.730329	145.542	2.51377	1.27283	3.66241	1.29057	3.44204	29.3215	1.6511	0.566066	2.78068	0.671757	3.16466	0	0	0	-0.123753	0.680403	-0.202998	0.410503	-0.0161948	1	-1.39498	0.0344329	-0.282308	0.187044
CD200	23.1284	32.2656	77.6266	64.1816	21.9397	23.968	0	26.5781	82.2072	5.1123	52.3059	23.8808	55.5803	18.312	32.9096	92.9352	0	31.371	98.4954	70.7088	8.06108	6.32932	18.3261	13.4817	43.4658	-0.617084	0.140268	-0.245687	0.577705	-0.0396593	0.834817	-0.31989	0.250918	-1.01068	0.0232976
CD248	56.169	34.6556	5.54476	7.00163	20.2521	102.409	33.5727	6.93343	196.411	1.46066	116.768	1.25689	6.78843	7.32482	16.1321	9.46562	9.77383	46.2309	9.62312	0.794481	3.35878	3.16466	14.9941	2.59263	14.4886	0.131813	0.761354	-0.221174	0.491973	-0.00568366	1	-1.87618	0.0182239	-0.315023	0.255495
CDCA7	125.554	54.971	155.253	135.948	38.8164	30.5048	41.9658	75.1121	101.021	18.9886	59.3321	38.9635	145.103	45.1697	92.2758	112.727	39.0953	21.4644	149.441	193.853	12.7634	28.4819	44.9823	43.5562	123.153	-1.09167	0.0152135	-0.0407861	1	-0.102447	0.49814	-0.153232	0.582707	-1.331	0.00123021
COBLL1	13.2162	29.8756	53.8634	40.8429	16.8767	32.6837	41.9658	36.9783	84.1246	16.0672	106.173	23.8808	56.0046	36.6241	18.068	18.9312	58.643	18.1622	75.8528	326.929	16.1222	30.0642	11.6621	21.2596	36.2215	-1.40391	0.00413239	-0.147458	0.947776	-0.0072813	1	-0.0867196	0.775061	-0.165973	0.729221
COL27A1	33.0406	17.9253	6.33687	11.0859	11.8137	21.7891	4.19658	1.15557	530.872	2.92132	1492	6.28443	11.4555	8.54562	10.3246	8.60511	19.5477	3.30221	6.22672	6.75309	0	1.58233	4.99804	6.22231	9.05537	0.0878892	0.855164	-0.143842	0.769388	-0.00677503	1	-1.85097	0.0190007	-0.612762	0.0754225
COL3A1	502.217	231.834	3.16843	4.66776	126.575	555.623	88.1282	19.6447	18417.8	2.19099	11786.3	2.51377	14.0011	35.4033	1.93586	6.02358	302.989	378.103	5.09459	1.58896	10.0764	4.74699	1.66601	1.03705	5.43322	-0.0281386	0.949742	-2.72982	0.01246	-0.00923209	1	-4.27373	0.000351698	-1.98732	0.00875235
COL4A2	280.845	108.747	3.96054	0.583469	77.6329	254.933	83.9317	13.8669	2821.65	9.49428	4206.33	12.5689	4.24277	17.0912	9.67928	4.30255	97.7383	163.459	3.96246	1.19172	4.7023	20.5703	0	12.9632	1.81107	0.103682	0.732518	-0.155949	0.598229	-8.69e-05	1	-1.4324	0.032805	-0.163666	0.458799
CORO2B	19.8244	16.7303	5.54476	3.50082	25.3151	23.968	12.5897	9.24457	184.906	9.49428	92.0093	32.679	8.90982	14.6496	7.74343	6.88409	9.77383	26.4177	6.22672	1.9862	6.04581	6.32932	8.33006	3.11116	3.62215	0.133505	0.793304	-0.227116	0.557957	-0.00757905	1	-1.17689	0.0358487	-0.134677	0.802413
CRMP1	23.1284	15.5353	0	6.41816	16.8767	56.6517	4.19658	3.46671	243.985	0	114.538	1.25689	2.12139	2.44161	12.2604	13.7682	9.77383	28.0688	2.26426	7.54757	1.34351	1.58233	3.33202	1.03705	5.43322	0.0161365	0.979008	-0.271165	0.304713	-0.010827	1	-2.56847	0.00810657	-0.272311	0.267521
CRYAB	23.1284	11.9502	0	0.583469	8.43836	37.0415	12.5897	6.93343	159.501	0	47.2872	0	0	1.2208	0	0	19.5477	42.9287	0	0	0	1.58233	0	0.518526	0	0.0513452	0.864437	-0.483493	0.138569	-5e-05	1	-1.59446	0.0262031	-0.211727	0.287419
DAB2IP	19.8244	17.9253	10.2974	7.5851	23.6274	50.115	46.1624	4.62229	556.517	5.1123	369.71	7.54131	9.75837	14.6496	10.9699	12.9077	9.77383	21.4644	7.35885	24.2317	6.04581	3.16466	13.3281	13.4817	16.2997	-0.0544535	0.928819	-0.125658	0.932267	-0.00517459	1	-1.32693	0.0303225	-0.0902134	0.995137
DDR2	82.6015	34.6556	5.54476	2.91735	20.2521	78.4408	29.3761	8.089	2596.48	1.46066	895	1.25689	4.24277	7.32482	0.645286	6.88409	39.0953	64.3931	8.49099	27.0124	2.68703	7.91164	1.66601	6.22231	5.43322	-0.251218	0.420245	-0.291496	0.28271	-0.00187638	1	-1.22555	0.0441151	-0.350475	0.179984
DENND5B	16.5203	78.8715	99.8057	81.1023	60.7562	78.4408	96.5214	86.6679	206.357	33.5951	114.872	119.404	79.3398	53.7153	56.7851	140.263	107.512	74.2997	161.329	378.173	30.9008	23.7349	56.6444	42.5191	43.4658	-1.48876	0.00147157	-0.59362	0.0821655	-0.0788051	0.6289	-0.817041	0.0290077	-0.305524	0.381318
DKK3	135.466	59.7511	0	1.16694	25.3151	145.987	20.9829	8.089	264.597	0.730329	155.914	0	0.424277	3.66241	1.29057	0	87.9644	87.5085	0.566066	1.19172	1.34351	1.58233	4.99804	0	0	0.0667137	0.848898	-0.770006	0.0754236	-1.22e-05	1	-3.1551	0.00449861	-0.69734	0.0501132
EDIL3	36.3447	4.78009	4.75265	4.08429	13.5014	37.0415	0	2.31114	100.063	1.46066	74.3882	1.25689	1.69711	4.88321	3.22643	0.860511	9.77383	8.25552	4.52853	2.38344	1.34351	1.58233	4.99804	3.11116	3.62215	0.242686	NA	-0.115995	0.898846	0.00357183	1	-1.53531	0.0286388	-0.17769	0.55146
ELN	19.8244	10.7552	0.792109	0	11.8137	43.5782	4.19658	2.31114	2244.16	0	1134.11	1.25689	0.424277	0	1.29057	0	19.5477	14.8599	0	0	1.34351	0	0	0	0	0.116994	0.540148	-0.186829	0.416368	0.000269615	1	-2.08924	0.0120208	-0.136836	0.437575
ENAH	56.169	39.4357	0	0.583469	25.3151	74.083	12.5897	5.77786	1897.6	4.38197	1028.16	3.77066	0.848554	6.10402	5.16228	0.860511	9.77383	79.253	1.6982	0	3.35878	7.91164	0	0	7.24429	0.0219794	0.968403	-0.426109	0.151887	-0.00827662	1	-3.47477	0.000843705	-0.528387	0.0857705
FGF2	52.865	31.0706	3.16843	2.33388	21.9397	84.9776	12.5897	1.15557	101.141	0.730329	38.9227	1.25689	2.12139	2.44161	5.16228	3.44204	19.5477	44.5798	2.83033	3.17792	1.34351	3.16466	14.9941	1.55558	5.43322	0.21759	0.504117	-0.228763	0.426737	0.00028603	1	-1.1714	0.0473037	-0.259187	0.318807
FLNC	194.94	77.6764	0.792109	0.583469	42.1918	206.997	37.7692	13.8669	531.471	0.730329	187.699	0	0.848554	4.88321	0	0	87.9644	145.297	0	0.794481	1.34351	3.16466	1.66601	0	0	-0.0275744	0.948504	-3.70215	0.00416003	-0.00222749	1	-4.28055	0.000168876	-3.85315	0.00129985
FRAS1	23.1284	0	0.792109	1.16694	3.37534	37.0415	8.39317	4.62229	190.299	0.730329	185.692	1.25689	2.96994	0	0.645286	1.72102	9.77383	14.8599	5.09459	0	0	0	0	0.518526	0	-0.0216844	0.95252	-0.844607	0.0889884	-0.00212515	1	-4.10963	0.00175125	-0.176783	0.331662
FRMD6	125.554	33.4606	3.96054	4.66776	11.8137	80.6198	25.1795	5.77786	310.973	0	131.49	6.28443	3.81849	2.44161	3.87171	3.44204	48.8691	80.9041	5.09459	4.36965	5.37406	4.74699	0	3.62968	0	-0.0197578	0.971884	-0.475348	0.129219	-0.000763731	1	-2.43018	0.00989934	-0.589945	0.0719372
GPR176	26.4325	11.9502	0	0	10.126	69.7252	8.39317	4.62229	92.5131	3.65164	48.4025	1.25689	1.27283	2.44161	5.80757	6.02358	0	29.7199	1.6982	0.794481	1.34351	1.58233	0	5.18526	0	0.0707113	NA	-0.112488	0.793863	-0.00234147	1	-1.08886	0.0493439	-0.09381	0.812263
HES4	75.9934	84.8466	15.0501	15.1702	111.386	37.0415	62.9487	39.2894	41.7028	403.142	45.5028	106.835	71.7028	40.2865	130.348	57.6542	48.8691	146.948	14.1516	2.78068	12.7634	17.4056	28.3222	14.0002	3.62215	0.340106	0.412183	-0.429835	0.175408	-0.0343071	0.817078	-1.16822	0.0343496	-0.237418	0.483707
HSPA1B	1169.64	1345.59	550.515	376.921	951.847	1006.66	209.829	236.892	59.4385	311.12	113.757	913.756	401.366	172.133	1284.76	643.662	195.477	470.565	110.949	49.6551	210.26	134.498	163.269	95.4088	88.7426	0.631057	0.129826	-0.0999473	1	-0.0264293	1	-0.687831	0.0721672	-1.16778	0.0125436
HTRA1	148.683	39.4357	2.37633	0	13.5014	98.0511	37.7692	6.93343	180.592	0	115.764	0	0	7.32482	0	1.72102	29.3215	52.8354	0	0.794481	5.37406	3.16466	1.66601	0	1.81107	-0.0152262	0.975296	-0.268147	0.31208	-0.00609516	1	-1.52216	0.0311233	-0.725965	0.049616
IFI44L	1450.48	2618.29	1593.72	972.644	2339.11	2281.32	2337.5	2455.59	851.552	863.979	1835.61	1410.23	1546.07	2386.67	1320.9	1622.06	1446.53	2118.37	1830.66	494.167	765.803	789.582	453.155	528.378	340.482	-0.63081	0.188885	-0.485296	0.18757	-0.767144	0.0182681	-1.15876	0.00327994	-1.01165	0.0064237
IFITM1	62.7772	192.399	268.525	163.371	128.263	89.3354	62.9487	70.4899	118.038	259.997	348.52	265.203	358.938	94.0018	414.273	443.163	48.8691	249.317	267.749	107.255	8.73284	15.8233	38.3183	96.4458	85.1204	-0.369319	0.416928	-1.01902	0.0206501	-0.366454	0.0511896	-1.19641	0.0239126	-1.31705	0.00713118
IFITM3	3584.91	3783.44	948.154	968.559	2334.05	6229.51	2522.15	1670.96	3028.49	4224.22	4027.78	3252.82	2027.2	2094.9	3567.14	3079.77	1299.92	2686.35	950.424	262.179	819.543	1041.17	864.66	1491.8	603.087	0.367479	0.449253	-0.149508	0.989134	-0.0286803	1	-1.06469	0.0232845	-0.269457	0.449291
IGHV4-59	0	5.97511	57.8239	70.5998	3.37534	0	12.5897	6.93343	0.479343	18.9886	15.2791	21.3671	77.6427	10.9872	15.4869	15.4892	0	0	132.459	3234.33	3.35878	0	29.9882	6.74084	0	-8.3249	0.000418929	0.0427179	1	-0.0101224	1	-0.0184387	0.952973	-0.147833	0.636674
IGKV1-17	0	8.36515	26.1396	25.6727	6.75069	8.71565	8.39317	9.24457	0.119836	0	4.79564	6.28443	10.6069	3.66241	5.80757	8.60511	0	3.30221	19.2462	273.699	0.671757	1.58233	4.99804	4.14821	0	-0.653072	NA	0.0194482	1	-0.0102463	1	0.121054	0.583056	-0.131924	0.673319
IGLV2-14	13.2162	27.4855	101.39	86.937	15.189	28.3259	20.9829	19.6447	0.359507	5.84263	28.3277	28.9084	42.0034	39.0657	31.619	43.0255	0	6.60442	211.709	3632.37	9.4046	1.58233	26.6562	12.4446	12.6775	-1.08075	0.0143846	-0.0371324	1	-0.00635401	1	-0.208386	0.400662	-0.265205	0.33431
IL6	287.453	127.867	200.403	150.535	221.085	213.533	994.59	174.491	5.3926	540.443	40.1495	343.13	104.796	106.21	132.929	151.45	5111.71	260.875	91.7026	73.4895	32.9161	42.7229	61.6424	204.299	173.863	-0.0255136	0.964066	-1.50152	0.0233851	-0.00291275	1	-0.0945423	0.702278	-0.0528174	1
IRS1	23.1284	38.2407	31.6843	37.342	28.6904	19.6102	4.19658	5.77786	472.392	5.1123	213.35	13.8257	65.3387	8.54562	32.9096	42.165	68.4168	16.511	37.9264	44.8882	2.01527	1.58233	21.6582	4.66673	23.544	-0.195653	0.683831	-1.75449	0.0100625	-0.0259	0.994776	-2.45392	0.00433272	-1.81331	0.00385689
ISG15	1189.46	1686.18	776.266	446.354	1944.2	1634.18	835.12	581.252	544.653	1939.75	1288.8	1264.43	1699.23	628.714	1634.51	1928.4	576.656	2641.77	540.593	129.898	243.848	205.703	368.189	240.596	309.694	0.104805	0.874063	-0.592389	0.08443	-0.105022	0.269553	-1.31564	0.019012	-0.649024	0.0905967
KLF12	158.595	308.316	247.93	204.798	199.145	176.492	151.077	195.292	424.098	58.4263	156.918	66.6149	173.529	311.305	118.733	214.267	146.607	107.322	293.788	359.9	156.519	139.245	146.609	53.9267	231.817	-1.01171	0.0265757	0.0307427	1	-0.103194	0.576833	-0.142065	0.614181	-0.619694	0.0792969
LRMP	145.379	282.025	370.707	278.315	192.395	244.038	339.923	288.893	65.0707	181.122	121.229	296.625	315.238	280.785	175.518	391.532	97.7383	277.386	491.911	730.525	231.084	113.928	149.941	200.67	202.84	-1.06043	0.0186559	0.0165629	1	-0.0155991	1	0.0575366	0.874067	-0.0827731	1
MAP1B	419.616	192.399	6.33687	1.75041	96.1973	503.329	130.094	25.4226	1663.56	6.57296	653.434	2.51377	10.6069	18.312	4.517	15.4892	234.572	285.641	4.52853	21.0537	14.7787	6.32932	6.66405	1.55558	9.05537	-0.123858	0.753759	-1.09913	0.0362099	-0.0121206	1	-3.29666	0.0018122	-1.25972	0.0181506
MAP2	69.3853	35.8507	3.96054	3.50082	10.126	76.2619	12.5897	6.93343	298.75	2.92132	124.91	5.02754	3.39422	12.208	0.645286	10.3261	9.77383	82.5552	13.5856	9.93101	2.01527	1.58233	1.66601	0.518526	5.43322	-0.39147	0.165796	-0.998714	0.0445342	-0.03348	0.669208	-2.46537	0.00921545	-1.62208	0.0118955
MARCKSL1	574.907	826.955	317.636	306.321	675.069	544.728	293.761	253.07	1594.17	331.569	726.372	356.956	482.403	385.774	637.542	763.273	244.346	340.128	315.299	172.402	162.565	125.004	254.9	223.485	271.661	0.177685	0.787559	-0.226306	0.816701	-0.121806	0.3793	-1.41696	0.00396087	-0.969506	0.0182195
MEST	69.3853	52.581	36.437	21.5884	28.6904	89.3354	29.3761	9.24457	703.914	6.57296	285.173	11.312	13.5769	29.2993	16.1321	13.7682	19.5477	54.4865	40.1907	17.0813	43.6642	6.32932	8.33006	7.25936	14.4886	-0.000333568	1	-0.190412	0.714859	-0.00358292	1	-1.15063	0.0383516	-0.409489	0.196797
MET	42.9528	14.3403	6.33687	8.16857	10.126	32.6837	4.19658	6.93343	58.36	3.65164	58.2168	1.25689	2.96994	0	3.22643	8.60511	9.77383	18.1622	16.982	56.4081	0	0	1.66601	7.77789	3.62215	-0.233071	0.428402	-0.274606	0.28271	-1.84e-05	1	-1.62926	0.0272133	-0.978456	0.0300762
N4BP3	3.30406	7.17013	22.9711	14.0033	30.3781	15.2524	16.7863	6.93343	126.786	41.6287	107.958	67.8718	34.7907	3.66241	32.2643	31.8389	9.77383	11.5577	43.5871	23.4372	7.38933	4.74699	28.3222	12.9632	18.1107	0.0361115	0.968403	-0.198781	0.737224	-0.00414424	1	-1.74515	0.00556775	-0.000857849	1
NCALD	95.8178	57.3611	137.035	114.36	79.3206	28.3259	33.5727	62.4009	259.804	38.7074	141.304	32.679	98.008	56.1569	68.4003	97.2377	19.5477	44.5798	153.404	98.5156	22.8397	22.1526	54.9784	23.3337	139.453	-0.845887	0.0655306	-0.260945	0.697972	-0.163516	0.337643	-0.585942	0.0603933	-1.33653	0.00045875
NCKAP1	59.4731	59.7511	19.8027	28.59	52.3178	128.556	8.39317	17.3336	561.07	12.4156	300.229	12.5689	19.941	20.7537	24.5209	23.2338	29.3215	39.6265	23.7748	29.793	17.4657	18.9879	23.3242	30.0745	23.544	0.314854	0.486755	-0.109462	1	0.0030164	1	-1.24919	0.023678	-0.185487	0.645673
NCOA3	875.576	1108.98	949.738	849.532	744.263	788.766	889.676	1090.86	475.148	411.906	467.519	693.801	645.75	866.77	517.519	974.098	733.037	693.464	969.67	1284.28	780.582	780.088	511.466	574.008	833.094	-1.09234	0.00316142	0.0799453	1	-0.0132847	1	0.104415	0.707434	-0.249303	0.322654
NKX2-1	9.91218	3.58507	2.37633	0	6.75069	10.8946	4.19658	2.31114	98.5049	0	115.876	0	0	0	0	0	9.77383	4.95331	1.13213	0.39724	0	0	0	0	1.81107	-0.0846902	NA	-0.322901	0.221344	-0.000271243	1	-2.29657	0.0123605	-0.313761	0.153897
NREP	294.061	191.204	57.8239	44.3437	133.326	409.636	188.846	130.58	3065.52	54.7747	1003.07	54.0461	28.0023	84.2354	76.1437	102.401	263.893	165.11	54.9084	26.2179	96.733	63.2932	43.3163	40.445	94.1758	0.185944	0.738683	-0.315476	0.408434	-0.00888934	1	-2.00545	0.00425263	-0.320374	0.347522
NT5DC2	82.6015	76.4814	101.39	68.2659	113.074	185.208	100.718	56.623	494.562	51.123	171.639	60.3305	77.6427	76.9106	72.9173	88.6326	97.7383	140.344	80.9474	149.76	20.1527	18.9879	86.6326	48.2229	36.2215	-0.290814	0.602285	-0.832088	0.0268968	-0.0321465	1	-2.23632	0.000259197	-0.505272	0.164715
NT5E	99.1218	63.3362	5.54476	7.5851	28.6904	67.5463	4.19658	6.93343	37.5086	0.730329	42.7146	6.28443	2.96994	20.7537	7.74343	12.9077	39.0953	44.5798	13.0195	8.34205	4.7023	3.16466	4.99804	1.55558	10.8664	-0.131561	0.789513	-0.352513	0.246556	-0.0177074	1	-0.755216	0.0812822	-1.15973	0.0186863
PARD3B	9.91218	11.9502	8.71319	12.2529	15.189	26.1469	8.39317	5.77786	476.706	5.1123	262.756	16.3395	12.7283	10.9872	20.6491	13.7682	0	9.90663	9.05705	8.34205	0	1.58233	19.9921	7.77789	10.8664	0.0752813	0.891241	-0.110759	0.925091	-0.011437	1	-2.16419	0.0106904	-0.176228	0.589846
PARD6G	0	14.3403	16.6343	18.0876	13.5014	2.17891	0	2.31114	112.046	0	46.5065	0	15.274	1.2208	21.2944	11.1866	0	1.6511	19.2462	15.8896	0	0	4.99804	1.03705	7.24429	-0.135062	NA	-0.0819413	0.955992	-0.00975959	1	-1.96856	0.0188978	-0.756015	0.0468982
PBX1	29.7365	25.0955	4.75265	2.91735	30.3781	93.6932	33.5727	5.77786	1766.02	8.03362	565.105	11.312	7.63699	21.9745	10.3246	14.6287	48.8691	28.0688	7.92492	2.38344	9.4046	0	23.3242	15.0373	14.4886	0.275879	0.392159	-0.17477	0.650785	-0.00251012	1	-1.58833	0.027082	-0.0630749	1
PFN2	85.9056	33.4606	0	1.16694	38.8164	69.7252	16.7863	2.31114	435.722	0.730329	119.891	1.25689	0	3.66241	1.29057	2.58153	68.4168	54.4865	0	0	0.671757	0	1.66601	0	0	0.117471	0.645012	-4.23378	0.00732372	-0.0146089	1	-4.37375	0.000603634	-2.53262	0.00704721
PHLDB2	26.4325	33.4606	30.1001	32.6743	21.9397	10.8946	16.7863	25.4226	248.899	17.5279	182.457	21.3671	21.2139	15.8704	14.8416	23.2338	58.643	9.90663	37.9264	21.8482	5.37406	0	21.6582	9.852	48.899	-0.42767	0.326557	-0.447902	0.162516	-0.0190628	1	-0.80029	0.0600081	-1.15885	0.0147912
PLS3	66.0812	58.5561	19.0106	29.7569	33.7534	91.5143	37.7692	17.3336	1529.7	5.84263	582.168	10.0551	16.9711	15.8704	17.4227	32.6994	68.4168	47.882	5.66066	14.6979	12.7634	1.58233	8.33006	12.9632	5.43322	0.0657432	0.908266	-0.462624	0.13761	-0.00894159	1	-2.85503	0.00221499	-0.719527	0.0585344
POC5	29.7365	44.2158	46.7344	32.0908	37.1288	41.3993	75.5385	88.979	28.7606	24.1009	28.2162	32.679	55.5803	50.0529	23.2303	37.002	58.643	100.717	58.8708	70.7088	49.0383	55.3815	18.3261	28.0004	43.4658	-1.1163	0.0123351	-0.31586	0.571645	-0.00571762	1	0.0783114	0.81583	-0.0190195	1
PPA1	389.879	378.822	358.033	291.151	194.082	298.511	100.718	177.958	183.349	93.4821	262.087	120.661	249.475	136.73	192.94	419.929	107.512	175.017	276.24	322.162	102.107	143.992	84.9666	168.521	211.896	-0.435812	0.402811	-0.0432306	1	-0.0179027	1	-0.176941	0.518019	-1.12118	0.00322303
PTPRD	16.5203	7.17013	2.37633	4.66776	8.43836	26.1469	20.9829	4.62229	456.454	5.84263	353.427	10.0551	5.5156	4.88321	0.645286	1.72102	0	4.95331	5.66066	0.794481	3.35878	1.58233	3.33202	1.55558	5.43322	-0.0275455	0.963265	-0.063456	1	-0.000938555	1	-2.3522	0.00878078	-0.202911	0.465898
PTPRK	19.8244	34.6556	57.8239	61.2643	64.1315	65.3674	25.1795	27.7337	202.283	9.49428	195.171	43.991	47.519	39.0657	29.6831	44.7466	48.8691	42.9287	82.6456	79.0509	12.7634	1.58233	38.3183	18.1484	41.6547	-0.466097	0.328765	-0.609948	0.0777865	-0.0255172	1	-2.01818	0.00133706	-0.657166	0.090388
RAI14	52.865	25.0955	6.33687	12.8363	32.0658	61.0095	8.39317	5.77786	1600.64	2.92132	549.714	6.28443	5.09133	8.54562	3.87171	17.2102	0	56.1376	7.92492	13.1089	2.01527	1.58233	11.6621	14.5187	9.05537	0.0841012	0.847614	-0.226218	0.421301	-0.00219917	1	-1.57316	0.0285552	-0.252423	0.322729
RALGPS2	42.9528	137.428	173.472	142.367	121.512	159.061	251.795	147.913	129.183	36.5164	167.29	224.983	128.98	142.834	91.6306	230.617	87.9644	69.3464	260.39	488.606	88.0002	64.8755	88.2986	56.0008	108.664	-1.60689	0.000657365	-0.0232078	1	-0.139362	0.390944	-0.248097	0.353606	-0.187256	0.651289
RASGRP3	148.683	199.569	366.746	331.994	180.581	198.281	163.667	305.071	241.948	147.526	288.854	301.653	434.884	190.445	258.76	349.367	244.346	274.083	401.907	591.491	110.168	166.145	163.269	284.152	115.909	-1.02495	0.0107178	-0.583266	0.0633506	-0.0318421	1	-0.380541	0.11066	-0.337406	0.197622
RBMS3	6.60812	17.9253	13.4658	4.66776	3.37534	13.0735	12.5897	16.178	648.79	12.4156	326.549	21.3671	18.2439	9.76643	14.1963	15.4892	9.77383	21.4644	22.0766	9.53377	4.7023	0	3.33202	2.0741	14.4886	-0.441296	0.210684	-0.435455	0.1497	-0.0587171	0.394083	-1.76771	0.0182239	-0.458022	0.138951
RELN	19.8244	5.97511	57.0318	44.9271	15.189	2.17891	0	6.93343	68.4261	0.730329	36.023	1.25689	11.0312	4.88321	14.8416	21.5128	0	3.30221	73.5885	34.1627	0	0	3.33202	22.8151	18.1107	-0.262848	0.492491	-0.0982144	0.937476	-0.0060779	1	-0.765695	0.0870267	-1.38927	0.0121119
SERPINE2	502.217	210.324	19.8027	14.0033	143.452	470.645	88.1282	36.9783	61.1162	6.57296	36.1346	5.02754	15.274	28.0785	14.1963	23.2338	273.667	293.897	11.3213	7.15033	18.8092	9.49397	9.99607	6.22231	18.1107	0.105728	0.844696	-0.985777	0.0299742	-0.00772301	1	-2.09202	0.00870592	-1.4793	0.00813817
SFRP1	36.3447	19.1204	0.792109	0.583469	6.75069	58.8306	12.5897	8.089	49.4921	0.730329	12.491	0	0	6.10402	0	0.860511	19.5477	42.9287	0	0	1.34351	1.58233	0	0	0	0.0372258	NA	-0.533823	0.114025	-0.00716371	1	-1.94196	0.0193167	-0.546173	0.0736393
SLC25A23	26.4325	63.3362	36.437	28.59	23.6274	87.1565	8.39317	16.178	433.086	9.49428	151.453	31.4221	44.5491	18.312	47.7511	58.5147	9.77383	9.90663	44.7192	69.1198	8.06108	7.91164	21.6582	9.852	45.2768	-0.282991	0.57246	0.00905416	1	-0.0378379	0.860199	-1.75513	0.00708882	-0.786485	0.0549049
SPTBN1	862.36	1071.93	1181.03	904.378	958.597	808.377	411.265	380.183	8163.44	502.466	5496.92	833.315	1265.19	765.444	946.634	784.786	664.62	477.169	1449.13	1304.93	205.558	215.197	1031.26	309.042	1034.12	-0.34054	0.537504	-0.387109	0.355142	-0.0618692	0.788961	-1.53558	0.00144348	-1.19818	0.00301985
STC2	66.0812	34.6556	0	0	15.189	87.1565	12.5897	9.24457	19.4134	2.19099	21.6361	0	0.424277	3.66241	0.645286	0	29.3215	41.2776	0.566066	0	2.01527	6.32932	1.66601	0	0	0.0691748	0.845749	-0.259333	0.361044	-0.000240572	1	-1.58349	0.0282741	-0.313829	0.206922
STRBP	52.865	82.4565	169.511	156.37	62.4438	71.9041	125.897	129.424	83.1659	37.9771	64.0162	155.854	114.979	108.651	78.7248	160.916	156.381	97.4152	220.766	251.453	70.5345	90.1927	68.3065	74.6678	114.098	-1.42822	0.000977129	-0.336412	0.520701	-0.0434068	1	0.038805	0.921815	-0.171509	0.683767
SYNE2	888.792	1497.36	3196.95	2508.92	1228.62	350.805	415.462	785.789	1007.46	692.352	1421.63	824.517	2661.49	961.993	1375.1	2325.1	117.286	246.015	2505.41	3690.36	101.435	262.667	1339.47	482.748	1369.17	-0.654704	0.128605	0.128205	1	-0.0539975	0.669208	-0.25991	0.332419	-1.12839	0.0129999
SYNPO2	66.0812	35.8507	47.5265	57.18	28.6904	63.1885	12.5897	25.4226	499.475	8.03362	141.081	10.0551	24.6081	14.6496	30.3284	38.723	29.3215	37.9754	32.8318	38.1351	3.35878	11.0763	16.6601	15.5558	19.9218	-0.175758	0.765015	-0.522867	0.116542	-0.0152871	1	-2.56323	0.000357625	-1.78751	0.00118918
TCF4	489.001	636.947	619.429	557.213	514.74	845.418	1099.5	704.899	2307.32	327.187	1427.76	598.278	386.941	487.1	346.518	560.193	1114.22	795.832	693.43	995.485	352.001	329.124	281.556	247.337	434.658	-1.207	0.0048684	-1.24366	0.000246395	-0.117607	0.564886	-1.17531	0.00051496	-0.795479	0.0151476
TEAD1	69.3853	54.971	19.8027	8.16857	20.2521	71.9041	12.5897	6.93343	1004.7	0	407.183	5.02754	20.3653	3.66241	7.09814	9.46562	29.3215	74.2997	21.5105	10.3283	1.34351	1.58233	3.33202	0.518526	10.8664	-0.358333	0.293602	-4.72681	0.000481624	-0.02607	0.834817	-4.02345	3.28e-05	-4.37559	5.08e-05
TENM2	59.4731	9.56018	1.58422	1.16694	6.75069	54.4728	8.39317	4.62229	6.59096	0	7.13769	1.25689	3.81849	1.2208	1.93586	0.860511	48.8691	44.5798	2.26426	0.794481	0	1.58233	3.33202	0	0	0.0152366	NA	-0.711335	0.0810097	-0.00124586	1	-1.29681	0.0398974	-0.31246	0.171271
THSD1	0	4.78009	3.16843	4.66776	11.8137	6.53674	8.39317	2.31114	96.228	4.38197	133.497	12.5689	6.78843	2.44161	7.09814	4.30255	9.77383	9.90663	5.09459	6.75309	0.671757	0	3.33202	4.66673	1.81107	-0.0259303	0.969652	-0.371846	0.18757	-0.00386598	1	-2.4509	0.00821029	-0.0834149	0.986767
TMEM47	46.2568	21.5104	0	0	10.126	58.8306	12.5897	2.31114	61.3558	0	33.5695	0	0	3.66241	0.645286	0	9.77383	18.1622	0	0	0	1.58233	0	0	0	0.0503305	NA	-0.135401	0.626858	-0.00387068	1	-1.04773	0.0473037	-0.225598	0.232713
TRAF4	56.169	101.577	164.759	116.11	192.395	89.3354	167.863	104.001	123.551	208.144	102.27	204.872	219.776	122.08	187.133	179.847	146.607	135.391	311.336	197.031	32.9161	36.3936	133.281	56.0008	77.8762	-0.888698	0.0520003	-0.825204	0.0142463	-0.562269	0.0480717	-1.16046	0.00276745	-0.386654	0.23964
TRIM2	26.4325	37.0457	14.258	19.838	45.5671	54.4728	8.39317	20.8003	591.269	6.57296	287.961	8.7982	25.4566	26.8577	16.7774	18.0707	19.5477	28.0688	23.2087	22.2455	7.38933	6.32932	4.99804	6.22231	18.1107	-0.322863	0.511478	-0.411515	0.209773	-0.0467846	0.724691	-2.85563	2.55e-05	-1.32659	0.00700746
TTC39A	13.2162	15.5353	9.5053	7.00163	15.189	13.0735	41.9658	23.1114	8.26866	11.6853	13.7178	20.1102	8.48554	10.9872	13.551	18.9312	68.4168	39.6265	11.3213	1.9862	3.35878	1.58233	6.66405	12.4446	3.62215	-0.0764545	0.904343	-1.31841	0.0158679	-0.0161813	1	-0.356089	0.22654	-0.118227	0.883283
TXNDC5	261.021	284.415	560.813	488.947	232.899	263.648	310.547	153.691	356.751	168.706	374.506	287.827	381.849	174.575	173.582	223.733	302.989	160.157	597.765	2518.5	227.726	253.173	323.206	231.263	275.283	-1.12609	0.01217	-0.0310223	1	0.00499745	1	-0.031868	0.935732	-0.171892	0.709903
USP18	221.372	268.88	255.851	129.53	340.91	246.217	176.256	171.025	84.8436	421.4	181.677	361.983	616.475	145.276	436.858	387.23	195.477	629.071	290.958	74.284	51.7253	55.3815	93.2967	66.3713	48.899	-0.208544	0.725614	-1.59211	0.00316161	-0.199904	0.144727	-1.36287	0.0104109	-0.801301	0.0511138
ZNF33A	105.73	158.938	251.891	203.047	155.266	189.565	339.923	299.293	265.556	100.785	182.011	165.909	163.771	218.524	112.925	164.358	97.7383	115.577	219.633	391.679	176.672	161.398	169.933	158.15	237.251	-1.12416	0.00686518	0.259042	0.773225	-0.00542835	1	-0.038756	0.921402	-0.0324165	1
ZNRF1	128.858	114.722	334.27	259.06	278.466	67.5463	54.5556	79.7344	188.861	79.6059	150.003	47.7617	248.626	80.573	368.458	294.295	29.3215	67.6953	245.106	238.344	20.1527	42.7229	129.949	172.669	81.4983	0.0354291	0.970276	-0.10264	1	-0.0171368	1	-1.32638	0.00696947	-0.719412	0.0680377
