# Supplementary material for: A humanized mouse model of chronic COVID-19 to evaluate disease mechanisms and treatment options
Source: Res Sq. 2021 Mar 17:rs.3.rs-279341. Preprint. [Version 1] doi: 10.21203/rs.3.rs-279341/v1 (PMC7987100; doi:10.21203/rs.3.rs-279341/v1)
Supplement: Supplement — Table S3. Distribution of Type I interferon responsive genes in SARS-CoV-2 infected lungs during the course of infection. Normalized counts for Type I interferon responsive genes within human DEGs are presented. For IFN-stimulated gene identification, http://www.interferome.org was used with parameters -In Vivo, Homo sapiens -fold change up 2 and down 2. [file 09aa92073ca2825e3fe8de6a.xlsx]

## Sheet: mouse DEGs
	normalized count																											log2FoldChange (unifected / (n)dpi and adjusted p value
days post infection (dpi)	2dpi	2dpi	2dpi	2dpi	4dpi	4dpi	4dpi	4dpi	4dpi	4dpi	4dpi	4dpi	4dpi	7dpi	7dpi	7dpi	14dpi	14dpi	14dpi	14dpi	28dpi	28dpi	uninfected	uninfected	uninfected	uninfected	uninfected	2dpi	2dpi	4dpi	4dpi	7dpi	7dpi	14dpi	14dpi	28dpi	28dpi
gene_name	Sample_1732_Lung_2dpi	Sample_1733_Lung_2dpi	Sample_1900_Lung_2dpi	Sample_1901_Lung_2dpi	Sample_1734_Lung_4dpi	Sample_1735_Lung_4dpi	Sample_1737_Lung_4dpi	Sample_1738_Lung_4dpi	Sample_1765_Lung_4dpi	Sample_1761_Lung_4dpi	Sample_1766_Lung_4dpi	Sample_1926_Lung_4dpi	Sample_1925_Lung_4dpi	Sample_1736_Lung_7dpi	Sample_1905_Lung_7dpi	Sample_1904_Lung_7dpi	Sample_1739_Lung_14dpi	Sample_1740_Lung_14dpi	Sample_1893_Lung_14dpi	Sample_1892_Lung_14dpi	Sample_2021_Lung_28dpi	Sample_2020_Lung_28dpi	Sample_1720_Lung_uninfected	Sample_1721_Lung_uninfected	Sample_2025_Lung_uninfected	Sample_1906_Lung_uninfected	Sample_1894_Lung_uninfected	log2FoldChange_2dpi	padj_2dpi	log2FoldChange_4dpi	padj_4dpi	log2FoldChange_7dpi	padj_7dpi	log2FoldChange_14dpi	padj_14dpi	log2FoldChange_28dpi	padj_28dpi
1600014C10Rik	919.133	717.237	661.731	413.675	352.788	561.708	461.633	326.078	798.487	775.719	1092.22	515.119	297.191	251.071	429.98	633.754	416.917	249.423	355.161	305.419	377.178	258.663	240.335	193.227	303.84	327.744	233.837	-1.26016	0.00141891	-0.697443	0.0627722	-0.000966978	1	-0.138768	0.840244	0.0174989	1
4930430E12Rik	76.5944	40.2659	52.9385	40.6177	5.97946	48.2325	24.241	25.743	41.5398	57.5182	197.687	50.6367	32.7729	2.52333	79.0962	207.297	34.9003	45.4613	33.0854	34.1117	63.8083	30.4309	0	4.54652	3.03083	56.049	13.6606	-1.43656	0.0251781	-0.287669	0.272604	-0.0157493	0.763409	-0.27481	0.190072	-0.0612306	0.772749
4930486L24Rik	113.571	134.639	43.0125	58.7394	34.6809	125.606	36.8885	28.6034	115.388	29.5364	79.0747	39.3841	84.9116	27.7566	73.206	103.648	32.0706	29.4884	31.7349	41.2514	24.8144	28.7403	21.8487	25.0058	34.0968	39.8993	19.2855	-1.14885	0.0228423	-0.539117	0.154731	-0.00171482	1	-0.0397509	1	0.0713546	0.894719
4930599N23Rik	42.259	45.2992	106.704	67.4878	46.6398	32.155	47.4281	28.6034	13.8466	67.6228	34.5952	78.7682	49.1594	10.0933	45.4382	49.3267	45.2761	41.7752	41.8631	42.0447	37.576	17.7514	15.6062	10.6085	25.0043	17.0997	15.2677	-1.60336	0.000183131	-0.907206	0.0395502	-0.00247289	0.946905	-1.16913	0.00274351	-0.0252296	1
5430427O19Rik	250.913	114.506	119.939	104.356	44.248	161.78	89.5863	61.974	87.6951	76.1728	187.802	53.1373	47.6697	13.8783	53.0113	199.804	82.0629	43.0039	57.393	47.5977	60.2634	85.3756	19.5077	28.7946	18.9427	55.099	36.964	-1.76893	0.00400794	-0.45079	0.195112	-0.00299724	1	-0.141805	0.660946	-0.0803219	0.802014
9330175E14Rik	54.1443	23.9079	95.9509	56.8647	25.1137	24.1163	34.7806	34.324	0	31.0909	4.94217	51.2619	33.5178	7.56999	15.9875	25.5999	27.3543	15.9729	28.3589	29.3519	63.0994	30.4309	6.24247	12.124	7.57706	19.9496	20.0891	-1.56894	0.00494751	-0.210346	0.471923	-0.00023594	1	-0.202586	0.425216	-0.167685	0.448316
A530032D15Rik	58.1061	28.9411	107.531	42.4923	13.1548	17.0824	26.3489	17.162	41.5398	47.4137	84.0169	57.5133	25.3245	5.04666	14.3046	56.8193	26.4111	93.3799	16.8803	13.486	48.9197	22.8232	1.56062	1.51551	3.78853	13.2998	11.2499	-2.76082	0.000735926	-0.364961	0.221492	-0.0153591	0.723871	-1.86915	0.00747749	-0.126066	0.425472
A530040E14Rik	79.2356	28.9411	36.3952	19.3715	5.97946	29.1405	16.8633	3.81378	23.0777	25.65	103.786	18.1292	7.44839	1.26167	13.4632	63.0632	8.48927	18.4302	6.75211	6.34636	22.6874	14.3701	0.780309	1.51551	3.03083	4.74991	0.803564	-3.91501	0.000199109	-0.68983	0.0707013	-0.186103	0.182497	-0.279624	0.180501	-0.0824209	0.620875
A530064D06Rik	158.471	94.3733	94.2966	44.367	35.8767	94.4554	82.2086	25.743	69.233	78.5046	128.496	47.511	26.8142	17.6633	33.658	84.9168	70.7439	44.2326	27.6837	30.9385	35.4491	40.5745	15.6062	4.54652	9.09248	15.1997	35.3568	-2.20835	0.000564034	-0.66459	0.107762	-0.0312313	0.415758	-0.281674	0.204474	-0.0954276	0.70892
AA467197	80.5562	54.1073	57.0743	29.9946	7.17535	40.1938	12.6475	19.0689	23.0777	49.7455	49.4217	21.8801	16.3865	1.26167	26.0849	101.775	32.0706	30.7171	11.4786	4.75977	31.9042	26.2044	0	6.06202	0	64.5988	4.01782	-1.44409	0.0272171	-0.206991	0.362844	-0.00128558	1	-0.127339	0.520084	-0.0291578	0.967613
AB124611	738.211	349.81	342.446	318.692	178.188	426.054	241.356	171.62	318.472	407.291	1087.28	265.061	102.043	65.6066	252.435	525.735	163.183	230.992	154.623	150.726	282.884	240.911	115.486	83.3528	91.6825	284.995	143.034	-1.24277	0.0181324	-0.350101	0.266985	-0.00063508	1	-0.0686368	1	-0.0471745	0.995701
Acod1	1604.52	1746.53	3091.11	1354.76	266.684	1132.46	849.489	567.3	69.233	997.242	331.125	560.13	160.885	21.4483	86.6692	780.485	1655.41	417.752	57.393	61.8771	460.838	1134.4	20.288	27.2791	9.09248	1431.62	32.1426	-1.6878	0.0251781	-0.205975	0.347817	0.000347847	1	-0.222733	0.226417	-0.0440708	0.807719
Acp5	793.676	529.749	1843.75	2256.47	278.643	238.148	206.576	571.114	526.171	314.796	1047.74	249.433	215.258	134.998	383.701	681.207	308.443	160.957	484.127	421.24	666.443	1387.14	62.4247	148.52	228.07	2729.3	199.284	-1.38793	0.0122032	-0.157336	0.614699	0.000362798	1	-0.047588	1	-0.0722288	0.877932
Acta1	6.60296	0	10.7531	5.62398	28.7014	2.00969	2482.07	13197.6	4.61553	2.33182	0	0.625145	4.46903	28806.4	7.57304	1.24878	2470.38	8.60078	1.35042	4.75977	2.12694	0.845303	4.68185	6.06202	69.709	4.74991	21.6962	0.174595	0.500003	0.0271195	1	-7.24568	0.00317671	-0.100787	0.525668	-0.0454523	0.67564
Actn3	5.28237	8.80817	12.4074	9.37331	11.9589	6.02907	269.813	1675.2	13.8466	11.6591	4.94217	11.2526	12.6623	2623	11.7803	3.12194	91.4955	11.0581	13.5042	13.486	9.21676	3.38121	8.5834	12.8818	11.3656	5.6999	12.857	0.00788152	0.990509	0.00243995	1	-6.25248	3.45e-06	-0.0856413	0.824944	-0.362199	0.133879
Ada	106.968	118.281	76.099	65.6131	52.6192	94.4554	32.6727	207.851	336.934	96.3819	464.564	66.8905	216.748	558.918	167.448	227.902	50.9356	92.1512	45.9144	37.2849	83.6598	81.1491	33.5533	46.2229	48.4932	56.999	39.3747	-0.3146	0.302185	-0.278655	0.351781	-2.59145	0.00211845	-0.0244848	1	-0.0975742	0.750665
Adap1	401.46	187.488	369.742	342.438	188.951	283.366	194.982	143.017	327.703	380.087	588.118	318.824	132.581	78.2233	270.105	538.223	161.296	168.33	286.29	326.838	321.878	245.983	39.7958	67.44	214.431	293.545	147.856	-1.08373	0.0185095	-0.718227	0.0821777	-0.000915451	1	-0.272082	0.262212	-0.0492982	1
Adar	3861.41	3031.27	4585.79	3231.92	2968.2	2817.58	3090.2	1745.76	1310.81	2941.98	2639.12	3819.01	3627.37	1558.16	2357.74	2685.49	3038.22	3317.44	2582.01	2507.61	2970.63	1486.04	1090.87	1186.64	1345.69	1508.57	1621.59	-1.21908	0.000347888	-0.477835	0.123823	-0.00119009	1	-0.653541	0.00732941	-0.093286	0.924933
Adgre1	2443.1	1035.59	5796.76	6325.73	668.503	1625.84	985.45	2062.3	1163.11	963.042	3162.99	1170.9	470.738	285.136	1102.3	1938.1	1283.77	755.64	1186.35	1067.78	2057.46	3495.33	110.804	532.7	349.303	2298.96	543.21	-2.15817	7.7e-05	-0.621839	0.122695	-0.000178716	1	-0.265337	0.24556	-0.154374	0.514571
Aida	2979.26	2720.47	1057.11	889.839	960.301	2470.91	989.665	882.891	2266.23	884.537	2204.21	636.397	999.574	720.411	1003.85	1670.24	1014.94	801.101	796.749	819.474	561.513	717.662	937.932	887.328	481.144	661.188	616.334	-1.05697	0.0146351	-0.42316	0.197166	-0.000695219	1	-0.0400965	1	0.0501436	1
Aif1	781.791	329.677	681.583	674.878	113.61	355.715	113.827	112.507	526.171	476.469	1581.49	237.555	309.853	22.71	441.761	1037.73	115.077	181.845	187.034	192.771	362.999	432.795	11.7046	19.7016	39.4007	224.196	65.0887	-3.80651	2.8e-07	-1.8958	0.00231041	-0.0532117	0.303986	-0.54716	0.0680715	-0.0983189	0.6773
Aim2	360.522	154.772	179.494	163.096	87.3001	244.177	162.309	105.832	249.239	122.809	385.489	149.41	90.8704	56.775	89.1936	275.355	146.204	152.357	116.136	112.648	164.484	179.204	46.8185	86.3838	53.0394	125.398	102.053	-1.01668	0.0272171	-0.301673	0.322466	-0.000820215	1	-0.150511	0.698072	-0.116044	0.715921
Anln	408.063	450.475	156.334	175.593	209.281	561.708	127.529	154.458	110.773	223.855	148.265	239.43	151.947	140.045	201.948	274.731	221.664	235.907	90.4783	104.715	258.778	295.011	96.7583	140.184	71.2244	105.448	94.8206	-1.03433	0.0126835	-0.38744	0.218869	-0.00190339	1	-0.137209	0.83397	-0.149183	0.682833
Apbb1ip	1752.43	1015.46	1162.16	1105.43	489.12	1452	702.989	501.512	2067.76	938.946	3158.05	715.791	493.083	286.398	652.964	1421.73	721.588	393.178	452.392	404.581	829.509	1065.08	223.168	354.628	359.153	1049.73	537.585	-1.00642	0.0272171	-0.56808	0.140799	-0.000255182	1	-0.0305742	1	-0.037208	1
Apobec1	4293.25	2232.24	1785.02	1574.72	937.579	3239.62	1435.49	1410.15	2233.92	1723.99	4872.98	1415.95	1154.5	335.603	1649.24	4145.94	1365.83	1927.8	1652.92	1437.45	1728.5	1640.73	167.766	529.669	334.906	1098.18	505.442	-2.11934	0.000245986	-1.16432	0.0252534	-0.0162774	0.532943	-0.508689	0.068077	-0.118079	0.65091
Apod	2041.64	602.731	761.817	259.328	761.783	1791.64	1079.25	291.754	12194.2	953.715	6162.88	855.198	1588	281.351	370.237	542.593	127.339	305.942	104.658	138.033	169.447	40.5745	60.0838	54.5582	162.149	279.295	136.606	-2.03494	0.00481545	-3.94794	4.64e-05	-0.00307812	1	-0.0598501	1	0.067651	0.794647
Apol9a	184.883	84.3068	356.507	151.848	124.373	92.4457	172.849	73.4153	221.545	210.641	212.513	359.458	286.763	27.7566	124.534	212.916	157.523	201.504	68.8716	67.4301	239.636	22.8232	9.36371	10.6085	14.3964	14.2497	35.3568	-3.10251	1.46e-05	-2.17348	0.000933317	-1.74051	0.0127903	-2.86562	0.000132374	-0.151112	0.397855
Apol9b	191.486	76.7569	321.767	126.227	162.641	150.727	153.878	74.3688	161.544	190.432	128.496	380.713	314.322	29.0183	146.412	243.511	181.104	175.702	63.4699	58.7039	191.425	23.6685	5.46216	9.09303	14.3964	14.2497	30.5354	-3.05586	2.37e-05	-2.77767	0.000150715	-2.32153	0.0069565	-2.89075	0.000143668	-0.112974	0.581196
Arhgap30	1880.52	953.799	2115.88	1887.16	639.802	1419.85	791.522	454.794	2307.77	2244.77	4487.49	1674.14	872.951	233.408	1676.17	2399.52	752.715	603.283	1198.5	1110.61	1597.34	1360.94	166.206	256.878	709.213	1796.42	848.564	-1.29977	0.0114086	-0.842295	0.0603103	-0.000389871	1	-0.175467	0.582732	-0.0157225	1
Arhgap4	439.757	319.611	561.644	569.897	273.859	400.933	376.263	211.665	244.623	463.255	484.333	455.731	231.645	113.55	257.483	369.638	459.364	372.291	397.7	358.57	411.209	381.232	80.3718	99.2656	244.739	207.096	238.659	-1.32734	0.000622078	-0.725922	0.055029	-0.000394124	1	-1.01663	0.00203032	-0.159893	0.678066
Arhgdib	4571.89	2093.83	1636.13	1817.8	865.826	2863.81	860.029	832.358	6267.89	1319.81	5900.95	926.464	653.224	436.536	1923.55	3460.98	721.588	973.117	696.143	681.441	1169.11	1250.2	686.672	555.433	353.849	1540.87	711.155	-1.46103	0.0109506	-0.830793	0.0684174	-0.00107716	1	0.000103131	1	0.0133545	1
Arl11	237.707	132.123	121.593	143.099	49.0316	189.916	64.2914	97.2515	318.472	139.909	375.605	78.1431	76.7184	15.14	153.144	392.116	66.0276	132.698	157.999	142.793	153.849	128.486	8.5834	43.1919	31.8237	183.347	75.5351	-1.35672	0.0212055	-0.524137	0.159447	-0.00133472	1	-0.188492	0.431707	-0.0591417	0.897507
Arrb2	2865.69	1710.04	1920.67	1867.79	1435.07	2055.91	1295.31	928.656	1864.67	2060.55	3059.2	1780.41	1228.24	674.991	1768.73	2465.71	1462.98	2436.48	1295.73	1284.35	1608.68	1382.92	408.882	547.855	762.253	1898.07	700.708	-1.00373	0.0233509	-0.618331	0.109648	-0.000581778	1	-0.333283	0.15218	-0.023099	1
Arsi	54.1443	50.3324	162.951	84.9846	38.2685	41.1986	63.2374	37.1844	286.163	141.464	474.448	89.3957	61.8216	42.8966	66.4745	54.9462	68.8574	35.6318	31.0597	34.905	90.0407	75.232	17.1668	29.5524	31.8237	13.2998	18.482	-1.55626	0.00427583	-1.27555	0.0151648	-0.00865027	0.660775	-0.255429	0.27255	-0.116062	0.698446
Ass1	1689.04	786.444	616.237	461.792	282.23	804.88	276.137	259.337	267.701	617.155	874.764	465.733	297.936	215.745	387.066	1138.88	230.154	362.461	229.572	208.637	448.076	424.342	310.563	267.487	210.642	421.792	221.784	-1.03059	0.0272171	-0.0786098	0.93644	-0.000899075	1	0.0494493	1	-0.0317411	1
Atf3	715.761	408.951	771.743	734.867	612.297	597.882	499.575	346.101	396.936	483.464	622.713	396.967	251.011	830.176	500.662	820.446	1862.92	1351.55	710.998	746.491	479.272	359.254	96.7583	96.2346	157.603	264.095	670.976	-1.07539	0.025942	-0.33448	0.280658	-0.0714504	0.187887	-2.0988	0.000313336	-0.082927	0.842878
Atp2a1	29.053	37.7493	89.3336	39.3679	173.404	14.0678	1217.32	14676.4	13.8466	83.1683	24.7108	20.0046	11.9174	12605.3	43.7553	17.4829	809.31	18.4302	74.9485	87.2625	45.3748	19.442	31.9927	11.3663	225.039	16.1497	42.5889	0.00433769	0.99865	-0.0291069	1	-6.57638	0.000294626	-0.108094	0.596279	-0.271502	0.165082
B2m	52599.2	34692.9	16775.7	14443	13965.6	37650.5	25790.3	19354	7883.33	12242.8	13012.7	15474.8	12601.2	11971.9	14385.4	24053.9	20514.8	21637.1	9096.45	9134.01	14266.1	7590.82	12074.5	11826.2	2099.6	6869.33	4780.41	-1.61324	0.000632221	-0.419356	0.206006	-0.0396548	0.232972	-0.250659	0.318965	-0.135857	0.679758
B430306N03Rik	328.828	309.544	387.112	189.966	187.755	234.129	221.331	68.6481	120.004	340.446	345.952	291.317	102.043	55.5133	139.681	224.155	269.77	191.675	170.153	153.899	197.097	125.95	68.6672	61.378	100.017	104.498	101.249	-1.44443	0.0021082	-0.437359	0.195112	-0.000569632	1	-0.456257	0.0673907	-0.0462096	1
B4galt6	923.095	744.92	516.15	498.66	501.079	742.58	376.263	587.323	789.256	333.45	1042.8	184.418	246.542	329.295	359.299	564.447	387.677	325.601	289.666	265.754	390.649	610.309	228.631	315.225	203.823	396.143	198.48	-1.22166	0.000262829	-0.921126	0.0114003	-0.000576507	1	-0.0693628	1	-0.148355	0.76503
BC147527	351.278	101.923	52.9385	29.3697	44.248	165.799	79.0468	0	124.619	156.232	296.53	65.0151	29.0487	3.785	35.3408	274.106	50.9356	65.1202	42.5383	37.2849	33.3221	8.45303	3.90155	5.30427	1.51541	0	19.2855	-2.42277	0.000591128	-1.16009	0.0264418	-0.00571286	1	-0.755306	0.0425385	-0.075792	0.785916
Bach2os	62.0679	36.491	81.8892	83.7349	20.3302	52.2519	14.7554	26.6965	36.9242	27.2046	69.1904	61.2642	36.4971	6.30833	57.2185	117.385	15.092	51.6047	38.4871	31.7318	68.7712	43.1104	0	4.54652	9.09248	51.2991	4.82139	-1.79556	0.00151775	-1.25898	0.0170491	-0.0205405	0.450785	-0.121113	0.809387	-0.134862	0.591432
Bank1	67.3502	71.7237	34.7409	33.119	26.3096	75.3633	37.9424	34.324	120.004	31.0909	252.051	12.5029	19.3658	29.0183	15.9875	41.2096	32.0706	22.1163	12.1538	9.51955	31.9042	31.2762	11.7046	11.3663	13.6387	4.74991	16.8749	-1.89811	0.00169541	-0.824904	0.0701387	-0.00334991	1	-0.149965	0.630015	-0.0788206	0.816998
Basp1	1976.93	1301.09	739.484	634.26	448.459	1492.19	548.058	792.313	900.029	566.632	1265.2	309.447	289.742	142.568	396.322	1346.81	877.224	403.008	261.982	234.022	448.076	595.939	195.858	317.498	83.3477	394.243	151.874	-1.56566	4.18e-05	-0.208734	0.47865	-0.0143024	0.352455	-0.309627	0.204451	-0.0243884	1
Batf2	316.942	279.345	242.359	129.352	142.311	182.882	121.205	70.555	13.8466	175.664	49.4217	115.027	131.837	146.353	130.425	134.868	116.02	130.24	98.5809	78.5363	107.056	59.1712	73.3491	71.9865	77.286	40.8493	50.6246	-4.42	0.000950307	-0.740756	0.0551142	-4.03201	0.00734709	-0.607967	0.0638716	-0.0572844	0.69843
Bcat1	55.4649	44.0409	4.96298	9.37331	16.7425	46.2228	31.6187	19.0689	581.557	13.2136	677.077	9.37717	5.95871	23.9716	15.1461	18.7316	10.3758	9.82946	1.35042	3.17318	9.92574	8.45303	0	1.51551	21.9735	4.74991	6.42852	-0.759909	0.0737941	-1.13833	0.02599	-0.00943056	1	-0.0228357	1	-0.00535163	1
Bcl2a1a	208.654	65.4321	105.05	74.3616	19.1343	104.504	32.6727	30.5103	13.8466	48.191	98.8434	40.0093	38.7316	7.56999	43.7553	212.292	46.2194	38.0892	13.5042	11.8994	56.0096	78.6132	9.36371	11.3663	10.6079	47.4991	9.64277	-1.74313	0.0118138	-0.191015	0.475465	-0.00668417	0.994141	-0.0870811	0.873328	-0.0660684	0.798548
Bcl2a1b	377.69	154.772	159.643	148.723	47.8357	280.352	72.723	61.974	281.547	94.8274	385.489	78.1431	73.7391	10.0933	108.547	383.999	93.382	109.353	48.6152	58.7039	95.7125	130.177	31.9927	40.1609	16.6695	127.298	37.7675	-1.46514	0.0213084	-0.456767	0.179962	-0.00187351	1	-0.0919241	0.865242	-0.0290586	1
Bcl2a1d	236.386	89.34	88.5065	89.9837	31.0932	199.964	40.0504	32.4172	101.542	76.1728	222.398	48.1361	31.2832	12.6167	56.3771	297.209	34.9003	36.8605	24.9828	25.3855	52.4646	65.0883	12.4849	24.2481	14.3964	35.1494	32.9461	-1.80702	0.00751548	-0.432808	0.195112	-0.0199807	0.587931	-0.0391283	1	-0.0446416	0.953903
Bend6	106.968	42.7825	57.9014	54.9901	35.8767	119.576	21.0791	35.2775	207.699	26.4273	158.149	19.3795	23.8348	32.8033	35.3408	88.0387	19.8083	15.9729	20.9316	17.4525	32.6132	38.0386	14.0456	23.4903	15.9118	52.2491	9.64277	-0.918214	0.0389258	-1.1455	0.0267269	-0.000776392	1	0.0511734	1	0.0299015	1
Blnk	656.335	327.161	545.928	593.018	113.61	366.768	196.036	329.892	429.244	135.246	593.06	181.917	157.161	84.5316	251.593	530.73	215.061	346.489	301.144	260.201	384.977	589.176	28.0911	93.9613	71.9821	280.245	147.856	-2.26193	5.04e-06	-0.802338	0.0665552	-0.00352312	0.914068	-0.495405	0.0589719	-0.259696	0.230035
Bok	83.1974	113.248	90.988	103.731	227.219	102.494	93.8022	105.832	923.106	183.437	400.316	146.284	159.396	92.1016	198.582	182.321	82.0629	126.554	125.589	115.028	180.081	147.928	88.1749	81.8373	137.903	75.9986	121.338	-0.0410582	0.963425	-1.00392	0.0264418	-0.000307499	1	-0.0526589	1	0.0325556	1
Brip1	108.289	93.1149	63.6916	62.4887	45.4439	91.4408	64.2914	64.8343	23.0777	45.8591	84.0169	86.27	66.2907	30.28	58.06	90.5363	88.6657	81.0931	29.0341	40.4581	77.988	73.5414	31.9927	25.7636	18.185	30.3995	32.1426	-1.07455	0.0185095	-0.218345	0.461287	-0.00752422	0.61324	-0.268816	0.271276	-0.214124	0.394832
Bst2	2725.7	1632.03	2730.47	1666.57	1717.3	1556.5	1238.4	617.833	692.33	2755.43	1260.25	2336.17	2677.7	407.518	1593.7	2122.3	1090.4	1855.31	618.494	694.927	1491.7	418.425	305.881	301.586	382.642	916.733	401.782	-1.67458	0.00274848	-0.75115	0.0856982	-0.00301878	1	-0.329303	0.15218	-0.0106264	1
Btk	579.74	280.603	326.73	290.573	121.981	382.846	155.986	170.667	373.858	192.764	691.904	143.783	115.45	50.4666	202.789	448.935	198.083	163.415	166.102	165.005	239.636	254.436	41.3564	76.533	62.8896	246.046	123.749	-1.68332	0.0025673	-0.638063	0.116757	-0.000801016	1	-0.167449	0.585549	-0.0670769	0.903291
C130026I21Rik	299.775	94.3733	56.2471	36.8683	17.9384	82.3972	61.1295	41.9516	60.0019	34.2	202.629	28.1315	14.1519	8.83166	19.3533	79.2973	14.1488	47.9186	11.4786	16.6592	45.3748	33.8121	15.6062	14.3973	2.27312	4.74991	26.5176	-3.09289	6.39e-05	-0.273591	0.337093	-0.135392	0.182497	-0.0821511	0.921465	-0.198082	0.222341
C1qa	5366.89	2656.29	5908.43	5220.93	1901.47	3248.66	1145.65	1375.82	3092.41	2812.95	9152.9	1925.45	2786.44	542.516	4313.27	4071.64	1272.45	1073.87	1448.33	1432.69	3571.85	4256.1	116.266	688.039	771.345	5852.84	764.993	-1.75524	0.00343512	-0.84312	0.0665552	-0.00019916	1	-0.0915743	0.935558	-0.0168767	1
C1qb	5167.48	2677.68	3778.48	3340.02	1315.48	3172.29	1002.31	1523.61	3263.18	1517.24	5984.97	1127.14	1406.26	420.135	2101.94	2630.55	1306.4	1115.64	829.16	740.938	1997.91	2666.93	116.266	625.146	394.007	2592.5	458.032	-2.20508	0.000199109	-1.26789	0.0184709	-0.000390483	1	-0.134737	0.718446	-0.0428832	0.99484
C1qc	5609.88	3017.43	4376.52	3958.66	1386.04	3231.58	948.561	1350.08	3438.57	2024.8	6760.89	1348.44	1795.06	480.695	2768.37	2934.62	1204.53	1107.04	1031.72	1059.84	2511.21	3300.91	131.872	640.301	534.941	3500.69	516.692	-2.1715	0.000188596	-1.13184	0.0270361	-0.000285444	1	-0.120277	0.805098	-0.0339333	1
C3ar1	2900.02	1465.93	2359.9	2097.75	614.688	2287.03	1324.82	2223.44	1440.05	1136.37	3469.4	695.786	394.02	225.838	853.229	2224.69	1266.79	842.876	779.194	710	1369.75	1863.89	67.8869	597.109	93.1979	1595.02	276.426	-2.07149	0.00151396	-0.785659	0.0768925	-0.00101252	1	-0.218992	0.320215	-0.117699	0.575914
Cacna1a	191.486	246.629	723.768	631.761	320.499	136.659	448.986	654.064	327.703	226.964	360.778	205.673	341.881	638.403	244.862	99.2777	591.419	930.113	733.955	688.581	480.69	652.574	89.7355	147.762	368.245	339.144	187.231	-0.252053	0.394251	-0.115917	0.767232	-0.00258474	1	-1.25208	0.0080084	-0.195418	0.355889
Cacna1s	26.4119	10.0665	9.92596	6.24887	9.56713	10.0484	130.691	880.03	0	1.55455	0	5.00116	6.70355	1284.38	6.73159	13.1122	80.1764	14.7442	1.35042	6.34636	7.7988	3.38121	2.34093	3.78876	12.1233	4.74991	2.41069	-0.0731214	0.935135	-0.0135328	1	-5.62922	6.39e-05	-0.108408	0.672167	-0.442987	0.120581
Calhm6	76.5944	31.4578	41.3582	19.3715	16.7425	41.1986	24.241	9.53446	50.7708	34.2	108.728	26.2561	15.6416	7.56999	12.6217	44.3316	7.54602	9.82946	10.8034	11.8994	25.5233	21.1326	3.12124	7.57753	5.30394	0.949983	8.03564	-2.71514	0.000125361	-1.01412	0.0406511	-0.14714	0.160612	-0.133718	0.640488	-0.126684	0.514571
Car13	454.284	310.803	223.334	173.719	126.765	311.502	202.36	308.916	420.013	115.814	494.217	58.1385	104.277	117.335	119.486	336.545	165.069	159.729	72.2476	73.7765	141.796	194.42	92.0765	134.88	31.066	167.197	72.3208	-1.29637	0.0123367	-0.484546	0.177844	-0.00211434	1	-0.0329704	1	-0.115316	0.718618
Casp1	419.949	249.145	305.223	251.83	104.043	291.405	130.691	152.551	576.941	179.55	840.169	118.152	128.112	47.9433	171.656	468.291	101.871	144.985	116.812	134.86	158.812	190.193	61.6444	91.6881	64.405	149.147	73.9279	-1.66708	0.00198323	-0.769602	0.0789718	-0.00218289	1	-0.102065	0.923946	-0.0549712	0.9711
Casq1	18.4883	22.6496	16.5433	12.4977	52.6192	6.02907	157.04	879.077	27.6932	28.7591	24.7108	23.1304	33.5178	1136.76	21.8777	14.9853	107.531	30.7171	34.4358	27.7653	15.5976	17.7514	11.7046	15.1551	118.96	13.2998	40.9818	0.11943	0.753543	0.0272053	1	-1.56969	0.0225929	-0.044841	1	-0.11594	0.432123
Ccl11	272.042	195.038	46.3211	31.2444	86.1042	284.371	105.396	138.25	212.314	39.6409	558.465	28.1315	53.6284	103.457	105.181	88.0387	47.1626	52.8334	36.4614	34.1117	26.9413	33.8121	20.288	35.6144	40.9161	17.0997	36.964	-1.51998	0.00524672	-1.51826	0.00475035	-0.0725585	0.187887	-0.076488	1	0.00125624	1
Ccl12	702.555	478.158	183.63	79.3607	107.63	367.773	57.9676	30.5103	161.544	174.887	622.713	36.2584	102.043	10.0933	68.1574	182.946	71.6872	117.954	5.40169	4.75977	26.9413	77.7679	2.34093	8.33528	5.30394	28.4995	8.03564	-4.9105	1.01e-05	-1.89944	0.00837896	-0.0219027	0.673479	-0.177745	0.357237	-0.027095	0.99803
Ccl28	22.4501	20.133	65.3459	36.2435	25.1137	31.1502	69.5611	63.8809	36.9242	17.8773	0	14.3783	16.3865	36.5883	17.6704	25.5999	10.3758	11.0581	15.5299	19.0391	46.0838	67.6242	14.8259	25.0058	10.6079	18.9997	16.0713	-0.50358	0.101002	-0.283193	0.345053	-0.00405991	0.780798	0.062918	1	-1.13183	0.015661
Ccl3	458.246	398.884	371.396	128.102	89.6919	365.763	137.014	88.6705	60.0019	94.0501	133.439	86.27	32.0281	11.355	21.0362	142.985	648.957	160.957	45.9144	48.391	73.7341	85.3756	5.46216	9.09303	9.09248	162.447	8.83921	-2.91467	0.00155985	-0.734774	0.0658533	-0.000131696	1	-1.65338	0.0124123	-0.0304595	0.985644
Ccl4	489.94	324.644	160.47	61.2389	80.1247	429.069	137.014	30.5103	32.3087	118.923	138.381	92.5214	32.7729	7.56999	20.1948	128.624	200.913	132.698	12.829	17.4525	34.7401	26.2044	1.56062	5.30427	0	21.8496	10.4463	-4.44725	0.000257364	-0.875229	0.0435602	-0.0141719	0.877652	-0.483708	0.0868851	-0.0507662	0.797522
Ccl5	266.76	75.4986	76.9262	30.6195	13.1548	100.484	20.0252	5.72067	73.8485	96.3819	138.381	26.2561	30.5384	1.26167	16.829	160.468	5.65951	93.3799	7.42733	11.1061	30.4862	6.76242	2.34093	5.30427	3.78853	10.4498	10.4463	-3.66614	0.00163477	-0.256708	0.273047	-0.0449577	0.532943	-0.114069	0.584329	-0.0374529	0.89193
Ccl7	421.269	179.938	229.124	82.4851	75.3412	257.24	104.342	78.1825	184.621	175.664	1621.03	88.7706	158.651	18.925	79.0962	241.638	75.4602	160.957	5.40169	6.34636	85.7868	54.9447	3.12124	5.30427	1.51541	35.1494	13.6606	-4.31807	7.88e-05	-1.68319	0.0112185	-0.070193	0.365108	-0.320003	0.149321	-0.0684206	0.696102
Ccl8	87.1591	44.0409	229.951	163.096	45.4439	38.1841	11.5935	17.162	1024.65	21.7637	2332.7	3.75087	63.3113	7.56999	49.6455	41.834	33.0138	15.9729	3.37606	0.793296	135.415	271.342	0.780309	0	5.30394	23.7496	18.482	-4.42464	0.000156775	-4.02508	0.000918558	-0.00311001	1	-0.258065	0.198827	-0.0720696	0.651739
Ccl9	1250.6	512.132	340.791	334.315	260.704	738.561	326.727	176.387	1112.34	426.723	2515.56	215.675	134.816	103.457	269.264	611.276	166.956	154.814	92.504	82.5027	184.335	266.27	157.622	193.227	59.8588	261.245	278.837	-1.22697	0.0251781	-0.445103	0.198944	-0.000846448	1	0.107725	0.854654	-0.00876839	1
Ccna2	456.925	754.986	194.383	196.839	275.055	457.204	106.45	138.25	129.235	205.977	405.258	183.793	138.54	182.942	225.508	404.604	172.615	138.841	39.8375	49.9776	257.36	317.834	227.85	64.409	46.9778	98.7982	95.6242	-1.27533	0.0127694	-0.209457	0.479675	-0.00765285	0.666445	0.0956848	0.964456	-0.096956	0.801223
Ccnb1	149.227	149.739	39.7038	41.8674	40.6603	138.669	24.241	50.5326	4.61553	41.1955	69.1904	60.639	19.3658	35.3266	63.9501	101.775	36.7868	38.0892	11.4786	7.93296	95.0035	93.8286	14.8259	17.4283	6.06165	45.5992	16.0713	-1.15808	0.0272171	-0.168266	0.565257	-0.00367783	1	0.0236193	1	-0.120855	0.594361
Cd180	1057.79	330.936	473.137	364.934	174.6	620.994	408.935	356.589	346.165	446.932	1240.48	261.936	148.223	132.475	226.35	842.924	332.025	289.969	266.033	268.927	444.531	415.044	106.902	253.089	73.4975	127.298	168.749	-1.64959	0.00322827	-0.296854	0.329512	-0.022688	0.422594	-0.19137	0.474891	-0.199457	0.331499
Cd22	109.609	37.7493	157.161	184.342	32.2891	19.092	25.295	110.6	138.466	35.7546	444.795	43.135	45.4352	25.2333	53.0113	75.551	89.609	71.2636	123.564	119.788	177.954	121.724	4.68185	51.5272	26.5197	45.5992	45.8032	-1.3534	0.0167115	-0.145508	0.646516	-0.000422562	1	-0.374608	0.120269	-0.181041	0.36678
Cd274	1286.26	827.968	1305.26	573.646	479.553	800.861	737.77	495.792	138.466	761.728	380.547	507.618	496.063	211.96	344.994	610.652	945.139	657.345	413.905	425.206	472.182	406.591	193.517	232.63	190.942	533.89	164.731	-1.3954	0.00516327	-0.249057	0.401383	-0.000299656	1	-0.428633	0.0827063	-0.0733039	0.911232
Cd300c2	545.405	249.145	358.989	353.686	118.393	385.86	213.953	196.41	346.165	369.982	894.533	307.571	155.671	65.6066	316.385	692.446	199.026	328.058	233.623	195.151	435.315	327.978	44.4776	90.1726	124.264	265.045	179.998	-1.16588	0.0251781	-0.342197	0.273863	-0.00222189	1	-0.199166	0.444547	-0.106257	0.726531
Cd300ld	956.109	524.715	248.976	186.841	215.26	881.249	330.942	169.713	387.705	437.605	716.614	341.329	152.692	99.6716	322.275	788.602	199.969	137.612	106.683	107.095	246.726	209.635	88.9552	105.328	90.9248	70.2987	139.017	-1.57997	0.00876197	-0.763246	0.0840243	-0.110577	0.1701	-0.0598043	1	-0.0640876	0.888741
Cd300ld2	17.1677	3.77493	14.0618	14.9973	3.58767	9.0436	22.1331	23.8361	36.9242	13.9909	39.5373	9.37717	3.72419	2.52333	4.20724	5.61949	10.3758	50.376	4.05127	4.75977	16.3066	17.7514	0.780309	0.757753	3.03083	3.79993	2.41069	-1.07376	0.035031	-0.518242	0.122779	-0.00196116	1	-1.00796	0.0303282	-0.141454	0.323872
Cd300ld3	38.2972	21.3913	19.8519	7.49865	17.9384	43.2083	16.8633	8.58101	23.0777	20.9864	113.67	21.8801	11.1726	1.26167	22.7191	49.9511	16.0353	27.031	6.75211	4.75977	15.5976	11.8342	1.56062	1.51551	3.78853	3.79993	2.41069	-1.66037	0.0173713	-1.19513	0.0241941	-0.174143	0.172296	-0.366581	0.127371	-0.0546	0.848682
Cd4	134.7	65.4321	188.593	177.468	51.4233	49.2374	26.3489	85.8101	216.93	76.9501	469.506	36.2584	140.03	27.7566	122.01	146.107	44.3328	17.2016	27.6837	19.8324	236.091	390.53	14.0456	18.1861	13.6387	44.6492	24.1069	-2.44053	5.48e-06	-1.62913	0.00247678	-0.0269305	0.359546	-0.0840261	1	-0.463278	0.0762728
Cd48	581.061	186.23	268.001	335.564	58.5987	328.584	111.719	146.831	272.316	175.664	736.383	108.775	65.5458	30.28	177.546	450.808	129.226	157.271	143.82	111.855	197.097	207.945	46.0382	84.8683	32.5814	128.248	94.017	-1.97119	0.000921674	-0.406758	0.223728	-0.00237164	1	-0.141703	0.682016	-0.0865693	0.79359
Cd52	4017.24	1520.04	1036.44	995.445	408.995	1934.33	682.964	471.002	558.479	875.987	2031.23	409.47	195.148	114.812	348.36	1308.09	443.328	734.752	172.854	142	425.389	500.419	197.418	309.921	82.59	391.393	268.391	-2.33119	0.000495535	-0.300549	0.313028	-0.00201958	1	-0.0371953	1	-0.0619581	0.86954
Cd53	2642.51	1332.55	1124.94	1066.06	526.192	2007.68	1051.85	1031.63	775.409	678.56	1927.45	425.098	264.418	208.175	569.661	1585.95	971.55	588.539	402.426	372.849	621.068	845.303	308.222	494.813	94.7133	838.835	456.425	-1.34899	0.0182297	-0.302091	0.320401	-0.00077852	1	-0.0682679	1	-0.075859	0.833843
Cd5l	6.60296	5.03324	12.4074	14.3724	15.5466	2.00969	27.4029	49.5792	101.542	18.6546	261.935	13.128	9.68291	5.04666	13.4632	12.4878	6.60276	4.91473	43.2135	46.8044	24.8144	8.45303	0.780309	3.03101	7.57706	6.64988	3.21426	-0.3576	0.269234	-2.1327	0.00140468	-0.00842547	0.817405	-0.974779	0.0254215	-0.13315	0.502416
Cd69	276.004	108.215	172.05	97.4824	26.3096	121.586	70.6151	37.1844	18.4621	62.9592	103.786	36.8835	18.621	2.52333	47.1211	116.761	46.2194	49.1473	16.8803	21.419	29.7772	50.7182	4.68185	16.6706	3.78853	16.1497	12.857	-3.62974	1.73e-05	-0.429036	0.188505	-0.0403302	0.422594	-0.204632	0.323932	-0.0905619	0.652431
Cd72	1148.92	436.634	1928.12	1695.94	233.199	736.551	413.151	225.967	429.244	959.933	1373.92	1029.61	670.355	37.85	653.806	1906.88	372.585	448.469	274.136	303.832	640.21	771.762	14.8259	59.8625	78.0438	450.292	146.249	-3.09504	4.3e-05	-1.05548	0.0355826	-0.0160214	0.646926	-0.542653	0.0711281	-0.0905061	0.678066
Cd86	478.055	213.913	219.198	175.593	102.847	284.371	166.525	140.157	96.9261	112.705	390.431	95.6471	78.2081	30.28	97.6081	252.877	130.169	87.2365	64.8203	47.5977	143.923	234.994	34.3336	68.1977	32.5814	85.4985	130.177	-1.44403	0.013943	-0.208447	0.472302	-0.00114207	1	-0.0328507	1	-0.117849	0.621069
Cdk1	153.189	168.614	73.6175	87.4842	58.5987	140.678	50.5899	67.6946	50.7708	97.9365	163.092	108.15	52.8836	30.28	100.132	224.78	101.871	106.895	33.7606	26.9721	136.124	155.536	17.1668	31.8256	11.3656	38.9493	39.3747	-1.58145	0.00595826	-0.325364	0.29287	-0.0818403	0.187994	-0.206042	0.403705	-0.200572	0.305199
Cenpe	202.051	158.547	148.889	153.097	72.9494	227.095	86.4245	75.3222	64.6174	181.882	182.86	208.173	133.326	54.2516	158.192	211.668	111.304	195.361	67.5211	88.0558	237.509	333.049	25.7502	38.6454	42.4316	124.448	54.6424	-1.09812	0.0244657	-0.309777	0.313008	-0.00196245	1	-0.260267	0.272228	-0.18804	0.425355
Cfp	693.311	485.708	904.917	867.968	431.717	491.369	363.615	561.58	429.244	598.501	1571.61	575.133	394.02	182.942	489.723	945.948	382.017	213.791	194.461	168.972	658.644	627.215	78.8112	112.905	131.841	428.442	234.641	-1.74449	0.000213533	-1.05096	0.0258008	-0.00680922	0.649467	-0.143092	0.771749	-0.172673	0.533253
Cgas	270.722	195.038	173.704	105.606	108.826	240.158	103.288	62.9274	96.9261	132.914	192.745	141.908	89.3807	51.7283	124.534	222.282	103.758	90.9225	64.8203	80.9162	99.9664	103.127	38.2351	47.7384	33.3391	56.999	64.2852	-1.66137	0.000825713	-0.664591	0.102385	-0.0159479	0.445057	-0.191027	0.528279	-0.0740287	0.908124
Chrm4	9.24415	2.51662	2.48149	1.24977	5.97946	0	168.633	0	18.4621	2.33182	0	1.25029	2.23452	3.785	2.52435	1.24878	172.615	101.981	4.05127	1.58659	2.83593	0	0	0	2.27312	0.949983	1.60713	-0.24281	0.368884	-0.173483	0.340843	-0.015222	1	-6.57447	0.000315906	-0.0205468	0.978156
Ckap2l	323.545	273.053	56.2471	76.2362	99.259	342.652	74.8309	121.088	50.7708	88.6092	69.1904	99.398	49.1594	51.7283	98.4495	239.765	134.885	101.981	24.9828	19.0391	143.214	144.547	38.2351	43.9497	9.85018	34.1994	48.2139	-1.3647	0.0192694	-0.344686	0.268818	-0.0520067	0.287109	-0.0681806	1	-0.152147	0.443702
Clca1	40.9384	6.29155	40.531	3.12444	10.763	4.01938	3.16187	33.3706	9.23106	12.4364	93.9012	1.87543	112.471	2.52333	164.083	34.3413	0.943252	12.2868	3.37606	27.7653	28.3593	103.127	2.34093	0.757753	1.51541	0	22.4998	-1.56534	0.0256963	-0.215174	0.329512	-1.52125	0.0340138	-0.0635496	0.897855	-0.128596	0.323327
Clec12a	978.559	250.404	791.595	840.473	171.013	494.383	291.946	302.242	207.699	356.769	1047.74	289.442	198.872	80.7466	288.617	896.621	295.238	184.302	195.811	211.81	386.395	576.497	96.7583	161.401	74.2552	194.746	161.516	-1.99873	0.000433524	-0.278882	0.352205	-0.00601414	0.804193	-0.139271	0.716468	-0.150494	0.514571
Clec4a1	1693	591.406	1098.47	974.199	241.57	875.22	403.665	378.518	673.868	446.155	2080.65	343.83	183.23	83.2699	334.897	822.944	298.068	246.965	157.324	156.279	337.475	538.458	123.289	108.359	61.3742	546.24	165.534	-2.26942	0.00023804	-0.744857	0.0891609	-0.000593598	1	-0.0630348	1	-0.0537255	0.941661
Clec4a2	599.549	280.603	353.199	417.425	80.1247	376.817	130.691	118.227	350.78	177.218	874.764	128.78	87.891	25.2333	149.778	349.033	100.928	98.2946	54.6921	65.8435	132.58	243.447	28.8714	51.5272	27.2774	447.442	82.7671	-1.68899	0.00971795	-0.412461	0.209664	-5.41e-05	1	-0.00928897	1	-0.0170041	1
Clec4a3	913.85	335.969	681.583	551.775	129.156	529.553	259.273	167.806	572.326	397.187	1695.16	238.805	165.354	56.775	309.653	757.383	173.558	126.554	139.094	110.268	331.803	353.337	90.5159	90.9303	74.2552	249.845	165.534	-1.93933	0.00107398	-0.636291	0.119229	-0.00213149	1	-0.0325879	1	-0.0606383	0.913924
Clec4n	163.754	110.731	112.494	140.6	53.8151	81.3924	52.6978	41.9516	318.472	90.1637	993.376	55.6379	88.6358	10.0933	59.7429	139.239	85.8359	44.2326	20.9316	23.7989	108.474	238.375	11.7046	26.5213	9.85018	141.547	34.5533	-1.01588	0.0372419	-0.455496	0.179962	-0.000180158	1	-0.0690193	0.994661	-0.0627715	0.824381
Cmah	662.938	802.802	575.706	586.769	389.861	677.265	478.496	514.861	673.868	303.137	884.648	291.317	490.849	319.201	599.112	438.945	365.039	237.136	246.452	246.715	377.887	593.403	321.487	271.275	215.946	127.298	339.104	-1.33783	3.36e-05	-0.82637	0.0178309	-0.00778445	0.417624	-0.0457622	1	-0.189611	0.640807
Cmpk2	4262.87	2881.53	2554.28	1139.79	1533.13	2223.72	1286.88	453.84	235.392	1798.61	1225.66	1351.56	1275.16	401.21	873.424	1711.45	1177.18	1330.66	1049.28	1015.42	771.372	300.083	378.45	342.504	197.761	138.697	336.694	-2.69635	9e-06	-0.778227	0.0808235	-0.0854673	0.191235	-1.05014	0.0165485	-0.0486374	0.975777
Cngb3	51.5031	22.6496	37.2223	29.9946	19.1343	40.1938	50.5899	4.76723	0	19.4318	0	18.1292	49.1594	3.785	12.6217	25.5999	25.4678	23.345	0.675211	2.37989	7.08982	1.69061	1.56062	0.757753	2.27312	1.89997	1.60713	-2.97763	0.00228922	-0.603158	0.085742	-0.0983266	0.29528	-0.336044	0.136773	-0.0281226	0.993007
Col11a2	237.707	200.071	559.162	234.958	265.488	76.3682	181.281	62.9274	23.0777	1101.4	93.9012	510.743	469.249	79.4849	541.893	280.35	117.907	738.438	245.777	255.441	355.909	47.337	13.2653	20.4593	262.166	140.597	84.3743	-0.424029	0.213424	-0.166156	0.547108	-0.00214591	1	-1.00487	0.0264325	0.00286093	1
Col1a1	7603.97	12057.1	16597	15084.1	23705	8071.92	8178.7	9095.87	158308	54165.1	124251	23813.6	26434.3	13904.8	54679	23787.3	10835.1	11399.7	30240.7	33333.5	17440.9	13657.6	5849.98	9623.46	24276.9	9853.22	10128.9	-0.0884042	0.891685	-1.25609	0.0121445	-0.00141916	1	-0.203509	0.473336	0.123829	0.70468
Col1a2	5018.25	6807.46	18796.5	18184.8	16424.4	6018.01	7790.85	6787.58	154916	49683.3	88543.9	26938.1	28950.4	10108.5	47541	16719.9	8348.72	6756.53	28838.3	30245.2	20988	16124.2	5602.62	8587.61	24480	11867.2	11935.3	-0.0215339	0.963425	-1.04594	0.0259346	-0.000322825	1	-0.127002	0.84485	0.122271	0.730439
Coro1a	3032.08	1496.13	2305.3	2182.73	1008.14	2110.17	985.45	407.121	2289.3	3168.17	5480.86	2391.18	840.923	280.09	2269.39	4251.46	751.772	632.772	918.288	864.692	1784.51	1762.46	295.737	352.355	1003.96	1819.22	1227.04	-1.03582	0.0272171	-0.427844	0.209664	-0.00091287	1	-0.023572	1	-0.00138494	1
Cotl1	5232.19	3240.15	2263.12	2354.57	1522.37	3718.93	1019.18	1370.1	2792.4	2205.9	6271.61	1607.87	995.85	604.338	2248.35	4458.13	1239.43	1193.05	1163.39	1086.81	2036.9	1876.57	409.662	646.363	684.967	1891.42	901.599	-1.7482	0.000677553	-0.881427	0.0530898	-0.0017023	1	-0.0990735	0.948103	-0.0366106	1
Cpz	52.8237	44.0409	37.2223	49.3661	76.5371	46.2228	53.7518	74.3688	1716.98	66.8455	711.672	61.8893	41.711	40.3733	85.8278	42.4584	41.5031	33.1744	41.8631	46.0111	48.9197	34.6574	47.5989	37.8876	55.3126	20.8996	49.0174	-0.071549	0.948837	-1.3101	0.0165039	-8.75e-05	1	0.0148279	1	0.0701103	0.847917
Ctss	11309.6	4109.64	7782.78	7356.8	2150.21	6479.24	3041.72	4901.66	3803.2	6822.13	12063.8	4896.76	3634.81	709.056	7466.18	10510.9	3312.7	2606.04	6481.35	5981.45	7639.99	4524.06	478.329	2399.8	1444.95	9239.53	2264.44	-1.16127	0.0272171	-0.293299	0.330105	-0.000359006	1	-0.148037	0.63411	-0.0450634	0.984562
Ctxn3	3.96178	5.03324	3.30865	0.624887	2.39178	1.00484	30.5647	106.786	0	1.55455	0	1.25029	8.19323	208.175	0.841449	2.49755	15.092	0	5.40169	5.55307	0.708982	5.07182	4.68185	5.30427	0.757706	0	1.60713	-0.0561005	0.963425	0.0558219	0.941682	-1.74399	0.0273908	-0.109605	0.600856	-0.783697	0.091872
Cx3cr1	3528.62	1910.11	2828.9	2813.24	1047.6	3002.48	987.557	1090.74	1130.81	1318.26	1853.31	955.846	680.038	439.06	1286.58	1981.18	1287.54	561.508	1071.56	981.307	1629.95	2607.76	287.154	1026	395.523	1171.33	706.333	-1.7682	0.000424382	-0.521395	0.158398	-0.000308806	1	-0.128246	0.822801	-0.104019	0.786143
Cxcl10	2132.76	1399.24	2217.62	472.415	595.554	690.328	590.216	145.877	18.4621	1408.42	968.665	569.507	487.87	51.7283	212.887	857.285	328.252	799.872	23.6324	22.2123	253.106	112.425	9.36371	20.4593	12.881	56.999	42.5889	-4.46025	0.000342255	-0.310665	0.218661	-0.0813851	0.368958	-0.190509	0.294556	-0.0500374	0.793905
Cxcl13	1883.17	1728.92	2527.81	2065.88	338.437	449.165	163.363	1512.16	350.78	160.118	4808.73	151.285	902.745	171.587	612.575	785.48	67.9142	73.721	11.4786	17.4525	634.539	4451.37	23.4093	34.8566	47.7355	4428.82	43.3925	-2.06106	0.0127694	-0.208379	0.375443	-0.000180502	1	0.0959559	0.719378	-0.0530978	0.785129
Cxcl9	328.828	140.931	200.174	133.101	15.5466	53.2568	37.9424	20.0224	138.466	61.4046	543.639	26.8812	82.6771	1.26167	27.7678	76.1754	16.0353	99.5233	6.0769	2.37989	40.412	22.8232	0	3.78876	4.54624	30.3995	10.4463	-5.13057	5.14e-05	-0.432614	0.140543	-0.00249229	1	-0.187931	0.302787	-0.0429646	0.848682
Cybb	7148.37	2795.97	5156.54	5018.47	1531.94	4436.39	2605.38	3034.82	2196.99	2939.65	6592.85	2117.37	908.704	663.636	2247.51	3846.86	2013.84	995.233	1866.96	1759.53	2303.48	4056.61	889.552	1529.9	710.729	5102.36	1439.18	-1.16693	0.0226513	-0.247592	0.404255	2.68e-05	1	-0.0105269	1	-0.0562842	0.965332
Cygb	1370.78	1162.68	775.052	736.742	1143.27	1863.99	678.748	564.44	15397.4	1192.34	9859.63	990.229	1289.32	759.523	1701.41	1472.31	431.066	428.81	644.827	600.525	601.925	650.883	553.239	466.776	1449.49	696.337	895.171	-0.177155	0.5638	-1.28626	0.0147097	-0.000346244	1	0.10189	0.920996	0.155172	0.518178
Cyth4	3279.03	1945.35	2473.22	2444.56	1426.7	2571.4	1487.13	1045.93	3027.79	2278.19	5599.48	1961.7	1235.69	500.881	1546.58	2649.28	1613.9	1682.07	1406.47	1352.57	2028.4	2167.36	365.965	631.966	744.068	1931.32	939.367	-1.39237	0.00352676	-0.947838	0.036265	-0.000339065	1	-0.26015	0.292451	-0.072726	0.928006
Daxx	1719.41	1108.57	1545.14	832.35	861.042	1016.9	797.845	405.214	895.413	1794.72	1462.88	1195.28	1267.72	359.575	1082.1	1324.33	708.382	1137.76	854.142	887.698	699.056	406.591	294.177	283.4	484.932	643.138	425.889	-1.44257	0.000733205	-0.756496	0.0596149	-0.00223419	0.96075	-0.495468	0.0459515	0.0419267	1
Dck	2054.84	1019.23	550.064	428.673	374.314	1286.2	422.637	238.361	443.091	557.305	1102.1	340.079	301.66	107.242	460.272	1186.34	377.301	251.88	160.025	193.564	316.206	288.248	200.539	140.184	93.9556	145.347	172.766	-2.07624	0.000828606	-0.636933	0.117961	-0.04271	0.324603	-0.0831752	0.969132	-0.0421708	0.992015
Dcn	3576.17	3501.88	1359.03	858.595	2890.47	5653.26	2739.23	5013.22	38433.5	1592.63	14915.5	809.562	1146.31	5225.82	2089.32	2057.36	1302.63	767.927	1237.66	1230.4	1036.53	1261.19	1296.09	2119.43	1892.75	1223.58	1491.42	-0.114028	0.780799	-1.0376	0.0380602	-0.00139478	1	0.112824	0.833975	0.0411609	0.997926
Ddx58	5665.34	4368.85	4507.21	3013.83	2709.89	3660.65	3424.31	2292.08	1093.88	2487.28	2644.06	3014.45	3061.29	1556.9	1842.77	3161.28	3607.94	4172.61	1983.1	2003.07	2489.23	1448.85	1447.47	1563.24	802.411	1079.18	1386.15	-1.5315	8.25e-05	-0.287691	0.32235	-0.00422671	0.678375	-0.49444	0.0404447	-0.152441	0.692623
Ddx60	1257.2	956.316	3207.74	1660.33	1249.71	904.36	2619.08	1243.29	406.167	1005.01	983.492	1901.07	2119.07	864.241	413.993	749.89	2222.3	2637.98	1345.02	1393.82	1719.99	622.988	285.593	359.933	437.954	332.494	664.548	-1.66631	0.000209114	-0.451227	0.184085	-0.00408551	0.776072	-2.15719	7.9e-06	-0.384448	0.128751
Dhx58	1634.89	1113.6	1303.61	806.104	692.421	999.82	900.079	403.308	313.856	1094.4	993.376	1028.99	1015.22	232.146	545.259	1005.26	736.68	1027.18	572.579	483.91	753.648	216.398	134.213	154.582	164.422	176.697	245.087	-2.3256	8.58e-06	-1.10686	0.0259346	-0.0765326	0.177632	-1.43894	0.00391465	-0.120789	0.685834
Dio2	839.897	1314.93	146.408	76.2362	222.436	1154.57	257.165	348.008	138.466	248.728	182.86	71.2665	113.216	105.98	333.214	378.379	61.3114	93.3799	68.8716	80.9162	38.994	46.4917	66.3263	65.9245	99.2595	90.2484	52.2317	-1.8067	0.00457433	-0.709902	0.0959057	-0.00759412	0.811472	0.018177	1	0.0575534	0.898766
Dnaja1	2976.62	3047.63	3069.6	2985.71	1463.77	2436.75	1274.23	1468.31	1624.67	1002.68	1556.78	1813.54	1237.92	1119.1	2674.12	3962.99	1265.84	1290.12	1029.02	1008.28	1057.09	1304.3	1273.46	1075.25	659.962	860.684	1271.24	-1.45639	3.3e-05	-0.323023	0.258188	-0.0713405	0.102648	-0.0409887	1	0.00286908	1
Dnase1l3	310.339	132.123	134	109.98	51.4233	73.3536	11.5935	19.0689	9.23106	85.5001	93.9012	15.0035	72.2494	15.14	30.2922	56.1949	76.4034	33.1744	13.5042	11.8994	89.3317	262.889	8.5834	6.81977	15.9118	6.64988	51.4281	-2.57537	0.000847282	-0.122584	0.691764	-0.00136839	1	-0.0816005	0.908157	-0.112463	0.514571
Dock11	1097.41	689.554	783.324	799.231	356.376	888.283	526.978	527.255	955.415	379.309	1275.08	390.09	219.728	352.005	400.53	759.256	482.945	319.458	349.084	376.022	423.971	627.215	280.131	336.442	265.197	494.941	359.997	-1.19739	0.00161855	-0.480266	0.140964	-0.000483761	1	-0.0447184	1	-0.0991259	0.889182
Dock2	2485.36	1332.55	2340.87	2419.56	819.186	1841.88	1229.97	930.563	1818.52	1546.77	3578.13	1518.48	694.935	333.08	1157.83	2175.37	1519.58	1487.93	1286.95	1251.03	1744.09	1727.8	248.919	469.049	812.261	1155.18	1040.62	-1.44829	0.00258063	-0.56495	0.133542	-0.000445806	1	-0.36495	0.121573	-0.110547	0.782409
Dok2	129.418	117.023	100.087	56.8647	111.218	131.635	54.8058	52.4395	166.159	131.359	588.118	71.2665	61.0768	26.495	53.8527	80.5461	38.6733	45.4613	36.4614	28.5586	51.7557	60.8618	13.2653	13.6395	50.0086	46.5492	36.964	-1.45519	0.0043697	-1.53849	0.00287412	-0.000444509	1	-0.0856745	1	0.00410003	1
Dtx3l	5937.39	3854.2	3546.88	2363.32	2444.4	4050.53	2478.91	1765.78	1956.99	2428.98	3508.94	2198.01	2078.85	1251.57	2330.81	3561.51	2579.79	2330.81	1617.81	1469.18	1832.72	1287.4	1369.44	1220.74	625.108	1129.53	1010.88	-1.62664	4.51e-05	-0.783573	0.048001	-0.0103171	0.450287	-0.292713	0.234956	-0.0461456	1
E230029C05Rik	139.983	91.8566	100.914	76.2362	70.5576	92.4457	65.3453	41.9516	41.5398	50.5228	79.0747	51.887	27.559	29.0183	24.402	23.7267	43.3896	35.6318	39.8375	25.3855	73.7341	71.8507	38.2351	27.2791	21.9735	52.2491	59.4638	-1.09425	0.0070699	-0.251965	0.386272	0.0012068	1	0.0581862	1	-0.0923813	0.89193
E2f8	277.325	182.455	84.3707	71.862	87.3001	303.463	66.3993	73.4153	36.9242	129.027	128.496	105.649	75.2287	55.5133	107.705	237.267	84.8927	117.954	31.0597	30.9385	131.871	107.353	25.7502	23.4903	24.2466	48.4491	41.7854	-1.16398	0.0272171	-0.351155	0.263872	-0.017858	0.537069	-0.0947304	0.910363	-0.0901247	0.757652
Ebi3	260.157	70.4654	159.643	185.591	56.2069	148.717	54.8058	73.4153	55.3864	83.1683	148.265	66.8905	21.6003	23.9716	68.9988	118.009	86.7792	61.4341	53.3417	39.6648	65.2263	78.6132	29.6517	32.5834	18.9427	76.9486	30.5354	-1.81252	0.000546916	-0.521467	0.16119	-0.00032472	1	-0.160168	0.64376	-0.0320491	1
Efcab10	18.4883	12.5831	9.92596	8.12353	4.78357	4.01938	17.9173	55.2999	0	0.777274	0	5.6263	3.72419	15.14	0.841449	8.11705	12.2623	25.8023	4.72648	3.17318	17.7245	21.9779	28.0911	20.4593	9.85018	3.79993	8.03564	0.044964	0.963425	0.888203	0.0555786	0.000238877	1	0.098417	0.911477	-1.60275	0.0197033
Eif2ak2	3341.1	2568.21	2634.52	1891.53	1222.2	2429.71	1550.37	1162.25	1407.74	1442.62	2317.88	1463.46	1862.84	711.579	1375.77	2482.57	1532.78	1401.93	1239.69	1278	1291.06	982.242	565.724	628.935	419.769	575.69	759.368	-1.99506	2.08e-07	-1.03809	0.0138301	-0.110353	0.0898078	-0.540984	0.0284386	-0.149007	0.70468
Epsti1	929.697	474.383	487.199	324.316	247.55	560.703	360.453	233.594	341.549	384.75	1072.45	279.44	227.921	45.42	270.105	729.91	325.422	371.062	152.598	139.62	285.72	159.762	59.3035	69.7132	53.7972	77.8986	149.463	-2.29841	0.000260466	-0.842827	0.0665552	-0.115582	0.1701	-0.31397	0.165694	-0.0978181	0.703898
Evi2a	386.934	174.905	215.89	176.843	80.1247	279.347	119.097	86.7636	244.623	168.668	686.961	98.7729	91.6152	40.3733	114.437	266.614	97.155	66.3489	110.059	113.441	139.669	148.773	35.1139	73.502	24.2466	107.348	90.8028	-1.7716	0.0014103	-0.601443	0.129289	-0.00144033	1	-0.107623	0.883407	-0.0819814	0.836757
Exo1	33.0148	44.0409	17.3704	23.1208	34.6809	42.2035	24.241	20.0224	0	40.4182	4.94217	33.1327	16.3865	17.6633	24.402	42.4584	42.4463	22.1163	10.1282	13.486	31.9042	44.8011	6.24247	5.30427	7.57706	4.74991	12.0535	-1.02749	0.0295862	-0.37916	0.240895	-0.0678469	0.230794	-0.259526	0.241203	-0.174785	0.377675
F13a1	1706.21	810.352	431.779	465.541	766.567	1300.27	923.266	296.522	9309.53	1156.58	10665.2	420.097	263.673	295.23	768.243	596.915	446.158	283.826	517.887	476.771	538.826	694.839	261.404	247.785	480.386	764.736	560.888	-0.407083	0.210628	-1.43421	0.0106878	2.03e-05	1	0.00853029	1	0.0486638	0.972831
F830016B08Rik	355.24	266.762	712.188	436.796	180.58	266.284	561.759	288.894	240.008	126.696	276.761	328.201	236.114	166.54	85.8278	167.336	459.364	286.283	294.392	260.201	305.571	124.26	138.115	165.19	51.524	82.6485	127.767	-1.68267	0.000132377	-0.381581	0.229701	-0.000572211	1	-0.897455	0.00824315	-0.228081	0.37472
F9	72.6326	23.9079	14.0618	17.4968	4.78357	38.1841	17.9173	9.53446	0	8.55001	24.7108	3.12572	8.19323	3.785	3.3658	29.9706	2.82976	8.60078	8.10254	7.13966	6.38083	10.1436	3.12124	11.3663	1.51541	2.84995	4.82139	-1.71886	0.0157755	-0.0893284	0.816884	-0.00502985	1	-0.0390136	1	-0.0774865	0.674411
Fbln7	33.0148	15.0997	12.4074	19.3715	37.0726	42.2035	31.6187	61.0205	2686.24	19.4318	434.911	18.7543	19.3658	37.85	31.1336	19.356	10.3758	8.60078	19.5811	15.8659	19.1425	17.7514	14.0456	14.3973	41.6738	4.74991	30.5354	-0.0598778	0.963425	-1.52459	0.0112872	-0.000613148	1	0.0449896	1	0.0316475	0.99803
Fcer1g	5871.36	2733.05	1618.76	1561.59	917.249	3475.76	1402.82	1340.54	1033.88	1270.84	3251.95	856.448	435.731	292.706	1014.79	2586.84	1381.86	1268	648.878	578.313	916.004	953.502	402.639	638.028	200.034	1268.23	372.854	-1.88721	0.00175415	-0.483839	0.179962	-0.00117646	1	-0.121876	0.784089	-0.0482034	0.973594
Fcgr1	1402.47	504.582	995.905	534.278	252.333	794.832	339.374	163.993	549.248	1036.88	2011.46	693.286	425.303	30.28	498.138	1572.21	265.054	224.849	173.529	131.687	523.937	162.298	11.7046	37.1299	35.6122	208.996	94.8206	-3.45663	5.51e-05	-1.6158	0.0100488	-0.0877846	0.265143	-0.245312	0.236043	-0.0582519	0.832922
Fcgr3	1500.19	980.224	841.225	864.844	315.715	1179.69	439.5	482.444	1412.35	672.342	2767.61	458.231	302.405	155.185	789.279	1094.55	386.733	604.512	417.281	360.156	637.375	676.242	185.714	289.462	158.361	1445.87	310.979	-1.00156	0.0282485	-0.431044	0.20841	-4.69e-05	1	-0.0395865	1	-0.000207673	1
Fcgr4	1031.38	504.582	350.717	242.456	143.507	559.698	250.842	115.367	272.316	340.446	672.135	198.796	93.8497	46.6816	220.46	433.95	115.077	148.671	62.7947	65.0502	142.505	98.9004	108.463	62.1357	31.066	209.946	77.1422	-1.80257	0.00503149	-0.439295	0.198259	-0.00131295	1	0.00409876	1	0.00135784	1
Fcrl5	23.7707	13.8414	33.0865	19.9964	3.58767	17.0824	18.9712	6.67412	13.8466	13.2136	69.1904	16.8789	8.19323	2.52333	4.20724	62.4388	6.60276	6.14341	3.37606	1.58659	10.6347	2.53591	2.34093	0	0	0	0	-4.77473	0.00128714	-1.00015	0.036265	-2.94569	0.0154588	-0.246892	0.183937	-0.0866153	0.504116
Fcrls	147.906	190.005	1144.79	1443.49	169.817	221.066	69.5611	227.874	484.631	164.782	1052.68	97.5226	110.981	50.4666	162.4	186.068	278.259	168.33	213.367	207.05	457.293	560.436	9.36371	60.6202	43.947	107.348	65.0887	-3.13943	1.36e-07	-1.95627	0.000503792	-0.00078109	1	-1.96122	0.00118607	-0.18011	0.386216
Fermt3	1851.47	879.559	976.88	976.074	602.729	1225.91	575.46	468.142	1126.19	1105.28	2392.01	786.432	522.877	257.38	890.253	1445.46	479.172	426.353	482.101	472.011	809.657	731.187	204.441	243.996	387.188	1186.53	504.638	-1.03208	0.0251781	-0.508087	0.163241	-0.000283076	1	-0.0233119	1	0.00140747	1
Fgd3	728.967	566.24	847.842	683.002	303.756	661.188	376.263	215.479	793.871	725.973	1111.99	674.531	335.178	113.55	497.296	864.153	590.476	298.57	422.682	356.983	631.703	592.557	73.3491	117.452	239.435	566.19	268.391	-1.33238	0.0117347	-0.819192	0.0671719	-0.000502249	1	-0.27003	0.242579	-0.0476134	0.99594
Fgl2	1401.15	851.876	1785.02	1269.77	655.349	913.404	779.928	537.743	1158.5	1097.51	1660.57	620.769	590.657	541.255	801.059	919.099	585.76	361.233	633.348	648.123	572.857	750.629	578.989	720.623	674.359	431.292	660.53	-1.00226	0.000924308	-0.25485	0.349251	-0.00026164	1	0.0418839	1	0.0436356	1
Fhl3	684.067	624.122	333.347	313.693	352.788	570.752	294.054	690.295	309.241	279.818	429.969	194.42	193.658	1621.24	280.202	465.794	332.968	200.275	141.794	138.033	160.939	256.127	126.41	175.041	126.537	263.145	110.892	-1.08498	0.0146327	-0.32436	0.282886	-1.76215	0.00286303	-0.0214911	1	-0.126926	0.739656
Folr2	68.6708	65.4321	92.6423	62.4887	64.5781	75.3633	41.1043	55.2999	221.545	55.1864	622.713	24.3806	71.5045	42.8966	75.7304	128	66.0276	49.1473	15.5299	17.4525	128.326	122.569	3.12124	25.0058	31.8237	31.3494	12.0535	-0.973872	0.0362961	-1.34539	0.0158576	-0.0196625	0.533836	-0.166724	0.520315	-0.106614	0.653137
Fpr1	433.155	192.521	536.829	488.037	69.3617	168.814	67.4532	127.762	50.7708	101.046	380.547	66.2653	35.0074	23.9716	161.558	98.6533	133.942	27.031	39.1623	36.4916	77.279	278.95	24.9699	24.2481	12.1233	468.342	26.5176	-1.54319	0.0188557	-0.230933	0.397742	0.000473154	1	-0.0386192	1	-0.00124158	1
Fpr2	787.073	415.242	507.878	391.179	118.393	323.56	173.903	122.994	101.542	209.864	558.465	107.525	63.3113	32.8033	116.961	216.038	200.913	110.581	49.2904	36.4916	115.564	263.735	63.9853	28.0368	18.9427	676.388	41.7854	-1.0783	0.0325436	-0.176437	0.513245	0.000623773	1	-0.0151843	1	-0.000899598	1
Fscn1	1831.66	1921.44	1101.78	1166.04	1221.01	1147.53	404.719	495.792	3706.27	1353.23	4324.4	744.547	1037.56	830.176	1020.68	1735.17	581.043	458.299	503.708	614.011	863.54	1227.38	671.846	574.377	686.482	335.344	631.602	-1.18361	0.0095211	-0.577044	0.123216	-0.00245694	0.975276	0.0566273	1	0.00371628	1
Fxyd2	47.5413	52.849	30.605	20.6213	20.3302	62.3004	13.7014	75.3222	156.928	6.21819	128.496	6.25145	16.3865	22.71	15.9875	24.9755	11.319	35.6318	20.9316	11.8994	20.5605	53.2541	5.46216	7.57753	7.57706	10.4498	8.03564	-1.86745	0.00241508	-1.73111	0.00306531	-0.0073005	0.802476	-0.187777	0.445692	-0.158739	0.433509
Fxyd6	385.613	314.578	300.26	310.569	490.316	324.565	323.565	412.842	4583.22	338.114	1265.2	297.569	487.125	420.135	666.427	380.252	272.6	289.969	328.828	322.078	331.094	314.453	151.38	307.648	381.884	332.494	167.141	-0.0917759	0.875812	-1.05909	0.0326398	-0.000488566	1	-0.0224779	1	0.0604777	0.94154
Fyb	3120.56	1552.75	3082.01	3320.65	693.617	2223.72	1192.03	1199.43	2058.53	1770.63	5396.85	1450.96	821.557	317.94	1550.79	2677.38	1694.08	2341.87	1232.26	1182.01	1444.9	2338.11	256.722	369.783	390.219	1730.87	560.888	-1.98718	0.000209114	-0.909808	0.0518199	-0.000955916	1	-0.677966	0.033742	-0.0972053	0.784174
G530011O06Rik	161.112	134.639	15.7161	10.6231	45.4439	157.761	8.43165	8.58101	73.8485	42.75	138.381	21.8801	14.8968	6.30833	28.6093	79.2973	15.092	20.8876	4.72648	1.58659	27.6503	10.1436	3.12124	6.06202	0.757706	14.2497	2.41069	-2.87737	0.0021082	-1.68458	0.0109495	-0.0118681	0.877652	-0.0497567	1	-0.0101587	1
Gatm	8277.48	3635.26	2346.66	2260.84	1055.97	4449.45	824.194	1348.17	1606.2	1049.32	3464.46	603.265	741.86	375.976	1783.03	3472.22	1048.9	739.667	892.63	918.636	1000.37	2485.19	203.661	578.165	217.462	1963.61	351.961	-2.70162	2.93e-05	-0.865221	0.0625724	-0.00142203	1	-0.113631	0.80558	-0.048905	0.960197
Gbp10	137.342	367.427	433.434	239.332	165.033	80.3876	345.698	22.8827	106.157	245.618	187.802	183.167	76.7184	27.7566	67.3159	45.5803	240.529	361.233	123.564	140.413	85.0778	27.895	7.02278	69.7132	20.4581	14.2497	44.9996	-2.73934	5.14e-05	-0.715628	0.0944196	-0.00113901	1	-2.50659	0.00058054	-0.0578593	0.892612
Gbp2	2740.23	2422.25	2191.16	1288.52	1417.13	1928.3	1644.17	962.98	1176.96	1877.89	1621.03	1387.2	1631.2	849.101	1035.82	1681.48	1351.68	1314.69	738.681	761.564	928.057	634.822	960.561	1016.9	587.98	958.533	575.352	-1.13557	0.00175467	-0.331987	0.248888	-0.000616731	1	-0.122974	0.915078	0.0296852	1
Gbp2b	1689.04	1660.97	1732.08	796.731	624.255	1193.76	1021.28	567.3	489.246	1053.21	1210.83	804.561	992.126	432.751	563.771	1163.86	828.175	912.911	570.554	548.961	488.488	442.939	590.694	504.663	258.378	444.592	338.301	-1.49088	0.000296469	-0.220487	0.452323	-0.00209068	0.967033	-0.243123	0.379225	-0.0496122	1
Gbp3	3651.44	2665.1	2508.79	1558.47	1392.02	2611.59	1751.68	673.133	752.332	2282.85	1477.71	1876.68	2827.41	548.825	1430.46	2385.16	1499.77	1464.59	1020.92	1024.94	1073.4	443.784	426.049	384.938	403.857	404.693	378.479	-2.25136	4.56e-06	-1.27727	0.0111571	-0.186921	0.0827592	-0.89771	0.0130895	-0.0517633	0.994747
Gbp4	1549.06	2275.02	1950.45	1315.39	1028.47	1133.46	1890.8	621.647	216.93	1934.63	1364.04	1562.86	1166.42	971.483	1055.18	974.045	2196.83	2758.39	2029.01	2065.74	1077.65	816.563	763.142	1069.95	543.275	257.445	806.779	-0.97389	0.0205088	-0.0201241	1	-0.00225734	0.975276	-1.63707	0.000276162	-0.135825	0.715633
Gbp5	1706.21	1294.8	1909.92	656.756	568.049	1081.21	1014.96	365.17	281.547	1186.9	1037.86	698.912	833.475	291.445	399.688	919.099	797.991	1084.93	335.58	345.084	367.961	214.707	262.964	241.723	167.453	302.095	171.159	-2.00718	5.49e-05	-0.462122	0.187207	-0.00711197	0.678375	-0.461197	0.0711281	-0.0375998	1
Gbp6	1572.83	819.16	861.904	534.903	424.542	988.767	375.209	233.594	235.392	701.878	444.795	815.814	1186.53	305.323	458.59	949.694	681.971	619.256	305.871	363.329	375.051	181.74	209.123	163.675	96.9864	144.397	123.749	-2.22522	7.91e-06	-0.847736	0.0581283	-0.306879	0.0530078	-0.815513	0.0178776	-0.0464032	1
Gbp7	4957.51	3685.59	2799.95	1859.66	1576.19	3111	2241.77	1200.39	1218.5	1809.49	1690.22	1659.13	2124.28	1246.53	1528.07	2341.46	2061.95	1900.77	1571.22	1676.23	1166.27	799.657	1436.55	1254.84	606.165	620.339	785.082	-1.6049	3.3e-05	-0.357885	0.235481	-0.00871116	0.480399	-0.371236	0.113645	-0.0322955	1
Gbp8	106.968	65.4321	160.47	134.976	65.774	84.4069	124.367	104.879	13.8466	111.15	54.3639	154.411	115.45	36.5883	88.3521	113.014	146.204	362.461	149.897	177.698	180.081	113.271	27.3108	39.4031	62.8896	77.8986	61.0709	-0.388702	0.195078	-0.102016	0.835319	-0.000531993	1	-1.84282	0.000451946	-0.195388	0.420065
Gdf3	109.609	46.5575	28.1236	14.3724	21.526	94.4554	36.8885	19.0689	50.7708	35.7546	113.67	78.7682	11.1726	3.785	49.6455	167.336	69.8007	38.0892	20.2563	13.486	57.4275	60.8618	2.34093	3.78876	6.06165	14.2497	5.62495	-1.53368	0.0226513	-0.889767	0.0469142	-0.205242	0.158853	-0.413093	0.109483	-0.0852594	0.626995
Glipr1	430.513	241.596	311.841	296.196	105.238	330.594	174.957	227.874	263.085	156.232	306.414	135.031	78.2081	68.1299	199.423	441.442	143.374	217.477	160.025	137.24	222.62	327.978	85.834	140.184	53.7972	194.746	152.677	-1.27209	0.00765726	-0.245199	0.407949	-0.00107433	1	-0.0984601	0.971596	-0.153229	0.608666
Gm10800	794349	67392.6	13.2346	14.3724	221.24	3350.15	1127.73	480.537	101.542	3.88637	64.2482	3.75087	6.70355	127.428	8.41449	7.49266	6486.74	464.442	4.05127	3.96648	3.54491	10.9889	142.016	190.954	8.33477	4.74991	5.62495	-7.78682	3.7e-06	-0.192584	0.32789	-0.000176166	1	-0.0487382	0.974857	0.00961352	1
Gm10801	42512.5	4058.05	1.65433	1.24977	28.7014	361.744	85.3705	35.2775	0	0.777274	0	0.625145	0.744839	22.71	0.841449	0	445.215	63.8915	1.35042	0	0	0	9.36371	17.4283	0	1.89997	0.803564	-4.3731	0.00871961	-0.0638684	0.806106	0.00330653	1	-0.0161386	1	0.0307987	0.803166
Gm11639	36.9766	16.358	57.0743	38.1181	16.7425	3.01453	22.1331	22.8827	0	8.55001	0	41.2596	52.8836	10.0933	7.57304	11.8634	11.319	41.7752	8.10254	8.72625	27.6503	22.8232	7.02278	8.33528	8.33477	8.54985	6.42852	-1.2633	0.0251781	-0.0117995	1	-0.000466242	1	-0.186923	0.436709	-0.165414	0.376187
Gm12185	180.921	106.956	178.667	84.9846	71.7535	78.3779	110.665	57.2067	9.23106	77.7274	29.653	98.1477	93.1049	36.5883	38.7066	74.9266	128.282	152.357	102.632	122.168	84.3688	38.8839	41.3564	56.8315	25.0043	18.0497	49.821	-1.44089	0.00440748	-0.0836344	0.91581	-0.00102261	1	-1.0963	0.00761084	-0.134018	0.65517
Gm13822	19.8089	28.9411	50.457	31.2444	10.763	15.0727	6.32374	0	9.23106	43.5273	24.7108	29.3818	12.6623	0	14.3046	42.4584	15.092	12.2868	16.2051	13.486	11.3437	4.22651	0	0	3.03083	3.79993	0.803564	-4.40874	0.000190775	-1.00538	0.0331533	-0.0575384	0.433357	-2.35199	0.00633082	-0.020845	1
Gm14085	25.0913	44.0409	81.062	48.1163	9.56713	18.0872	27.4029	22.8827	4.61553	43.5273	108.728	38.759	6.70355	12.6167	23.5606	35.5901	20.7515	4.91473	8.10254	11.1061	23.3964	20.2873	7.80309	6.81977	10.6079	26.5995	12.857	-1.34711	0.0132493	-0.0718779	0.956651	-0.001714	1	-0.0124488	1	-0.0880289	0.80513
Gm14461	19.8089	6.29155	17.3704	32.4941	5.97946	10.0484	6.32374	43.8585	55.3864	0.777274	64.2482	2.50058	8.93807	0	11.7803	11.239	28.2976	52.8334	60.769	61.8771	20.5605	20.2873	0.780309	11.3663	3.78853	21.8496	15.2677	-0.422071	0.210494	-0.259835	0.366088	0.000549067	1	-1.47514	0.00902097	-0.0642603	0.852255
Gm15056	72.6326	52.849	38.8767	16.2471	5.97946	11.0533	14.7554	3.81378	0	55.1864	54.3639	7.50174	53.6284	1.26167	5.89014	155.473	3.77301	18.4302	0	0	17.7245	20.2873	1.56062	0	0.757706	7.59986	0	-2.62854	0.0127694	-0.0947261	0.677265	-0.134471	0.30173	-0.0625679	0.861941	-0.0801407	0.505571
Gm15523	18.4883	11.3248	29.7779	31.2444	2.39178	11.0533	5.26978	3.81378	18.4621	7.77274	24.7108	13.128	9.68291	1.26167	10.0974	6.86827	7.54602	17.2016	7.42733	7.93296	24.1054	20.2873	2.34093	1.51551	3.78853	5.6999	4.01782	-2.19625	0.000514195	-0.376894	0.23666	-0.000242904	1	-0.352217	0.134765	-0.100264	0.692775
Gm21188	451.643	201.33	348.236	282.449	186.559	259.25	200.252	128.715	230.777	271.268	672.135	200.671	86.4013	37.85	235.606	423.96	155.637	173.244	118.837	95.9888	147.468	136.939	25.7502	24.2481	43.1893	152.947	71.5172	-2.12738	0.000217081	-1.43402	0.010397	-0.00958618	0.673479	-0.330348	0.151222	-0.0481403	0.982841
Gm21738	62833.8	5355.37	3.30865	4.9991	56.2069	269.298	92.7482	59.1136	0	0.777274	14.8265	0	3.72419	47.9433	1.6829	0.624388	410.315	44.2326	0	2.37989	1.41796	2.53591	28.8714	28.7946	1.51541	6.64988	5.62495	-2.50666	0.0165035	0.047304	0.975389	0.00411805	1	0.0644664	0.842282	0.0163273	1
Gm34589	25.0913	22.6496	28.9507	28.7448	10.763	8.03876	30.5647	11.4413	4.61553	13.9909	14.8265	16.2538	0.744839	2.52333	0.841449	4.99511	20.7515	12.2868	14.8547	16.6592	18.4335	24.5138	7.02278	9.85078	7.57706	4.74991	15.2677	-1.29091	0.00993904	0.0141158	1	0.00183567	1	-0.22519	0.382607	-0.35283	0.128751
Gm35154	56.7855	15.0997	9.92596	14.9973	11.9589	18.0872	11.5935	5.72067	13.8466	19.4318	14.8265	11.2526	8.93807	1.26167	3.3658	17.4829	9.43252	3.68605	6.75211	10.3128	10.6347	6.76242	1.56062	0	4.54624	6.64988	5.62495	-1.72942	0.0146327	-0.411818	0.184562	-0.00110751	1	-0.0995244	0.766457	-0.0364552	0.967528
Gm36161	879.515	402.659	210.099	188.716	241.57	457.204	341.482	12.3948	240.008	294.587	859.937	116.277	53.6284	70.6533	170.814	584.427	212.232	281.368	129.641	118.994	107.765	87.0662	18.7274	33.3411	15.1541	85.4985	40.1782	-2.70226	0.000632221	-1.05093	0.0342012	-0.116701	0.211389	-0.417265	0.108472	-0.0521127	0.878068
Gm4070	392.216	226.496	408.619	258.078	74.1453	238.148	131.745	58.1602	166.159	251.837	499.159	139.407	195.148	80.7466	310.495	455.803	137.715	57.7481	157.999	161.832	112.019	110.735	73.3491	60.6202	24.2466	32.2994	89.9992	-2.21417	7.34e-05	-0.485563	0.179962	-0.558626	0.0360607	-0.248185	0.281943	-0.0466073	0.992003
Gm45418	18.4883	7.54986	42.1853	19.9964	21.526	13.063	32.6727	14.3017	4.61553	24.0955	19.7687	36.8835	30.5384	7.56999	12.6217	14.3609	30.1841	24.5737	8.77775	14.2793	20.5605	2.53591	1.56062	4.54652	3.78853	3.79993	8.83921	-1.02197	0.0346404	-0.429948	0.196452	-0.00626239	0.946941	-0.702664	0.0466703	-0.0632695	0.851587
Gm4841	72.6326	55.3656	69.4817	31.8692	35.8767	31.1502	36.8885	28.6034	36.9242	45.0819	84.0169	30.6321	31.2832	12.6167	24.402	19.356	33.9571	47.9186	18.2307	15.8659	12.7617	13.5248	6.24247	12.124	9.09248	2.84995	6.42852	-2.6463	9.67e-09	-1.68954	0.000412371	-0.0551716	0.182497	-1.76465	0.000307354	-0.090363	0.870755
Gm4951	616.717	298.22	858.596	446.794	215.26	295.424	379.424	223.106	161.544	260.387	336.067	425.098	458.076	128.69	181.753	344.662	432.009	453.384	228.221	245.128	388.522	141.166	70.2278	83.3528	34.0968	71.2487	85.9814	-2.60062	1.12e-07	-1.05684	0.0266296	-0.184345	0.0830397	-2.09451	7.7e-05	-0.258245	0.241782
Gm5431	1443.41	607.764	918.151	439.296	273.859	711.43	541.734	381.378	235.392	333.45	617.771	374.462	322.515	80.7466	273.471	642.495	404.655	514.818	216.068	212.603	467.928	153	62.4247	120.483	37.1276	134.898	152.677	-2.60417	4.43e-05	-0.662822	0.109296	-0.0206616	0.513506	-0.359243	0.131019	-0.124689	0.56235
Gm6377	165.074	69.2071	67.8274	65.6131	28.7014	100.484	30.5647	38.1378	18.4621	29.5364	168.034	11.2526	6.70355	17.6633	10.9388	54.9462	39.6166	14.7442	9.45296	7.93296	17.7245	54.9447	14.0456	25.0058	6.06165	39.8993	21.6962	-1.23932	0.0266202	-0.112014	0.75683	-0.000149844	1	0.05333	1	-0.0528876	0.918208
Gm9801	18.4883	3.77493	23.1606	21.2462	32.2891	8.03876	79.0468	24.7896	9.23106	25.65	4.94217	46.8859	40.2213	40.3733	10.0974	4.37072	62.2546	90.9225	92.504	84.0893	34.7401	10.9889	15.6062	9.85078	67.4359	2.84995	40.9818	0.0463229	0.963425	0.00511464	1	-0.000127166	1	-1.27507	0.0138923	-0.0458416	0.95763
Gpr141	661.617	225.238	271.31	210.587	137.528	302.458	254.004	40.9982	101.542	251.059	434.911	190.669	55.8629	50.4666	183.436	335.921	102.814	65.1202	107.359	110.268	109.183	79.4585	64.7657	90.1726	43.947	96.8982	133.392	-1.28404	0.0244657	-0.201233	0.484019	-0.00228846	1	-0.0247345	1	-0.00252389	1
Gpr162	81.8768	23.9079	142.272	136.85	25.1137	14.0678	18.9712	88.6705	64.6174	66.8455	148.265	65.6402	37.2419	17.6633	83.3034	124.253	37.7301	33.1744	143.145	124.547	142.505	98.0551	0.780309	12.124	62.1319	27.5495	24.1069	-1.68576	0.00516327	-0.374553	0.245035	-0.0144237	0.590974	-0.931381	0.0220384	-0.183782	0.338394
Gpr176	42.259	66.6904	70.3089	70.6122	50.2274	27.1308	53.7518	58.1602	2155.45	41.9728	1037.86	55.0127	58.0974	30.28	54.6942	98.6533	46.2194	27.031	23.6324	28.5586	68.0622	87.0662	3.90155	17.4283	14.3964	54.149	44.196	-0.727438	0.0817405	-1.40018	0.0149251	-0.00324682	1	-0.0926648	0.854585	-0.0575823	0.855426
Gpr18	122.815	39.0076	62.0372	65.6131	5.97946	56.2713	26.3489	20.0224	27.6932	20.2091	74.1325	28.1315	8.93807	6.30833	20.1948	29.3462	22.6381	4.91473	10.8034	9.51955	34.0311	25.3591	10.144	10.6085	2.27312	30.3995	20.0891	-1.57117	0.0147831	-0.212753	0.441834	-0.000116642	1	0.0289899	1	-0.0335221	1
Gpr31b	76.5944	32.7161	66.1731	41.8674	11.9589	42.2035	24.241	3.81378	9.23106	31.8682	39.5373	11.2526	8.19323	1.26167	9.25594	21.2292	16.9785	11.0581	4.05127	3.96648	13.4707	10.9889	0	1.51551	2.27312	20.8996	4.01782	-2.14013	0.00861582	-0.355763	0.200435	-0.000392263	1	-0.0923903	0.769176	-0.0132039	1
Gpr65	569.176	314.578	234.914	239.332	112.414	443.136	177.065	146.831	152.313	152.346	479.39	84.3945	55.8629	32.8033	99.291	248.506	194.31	129.012	72.2476	76.1564	153.14	177.514	57.7429	78.8063	21.2158	132.998	65.0887	-1.81083	0.00231823	-0.502735	0.171336	-0.000560866	1	-0.11669	0.815114	-0.081855	0.807323
H2-T22	3532.59	1916.41	1688.24	1238.53	1286.78	2587.47	1385.95	764.663	1495.43	2310.83	2021.35	2666.24	2525	691.393	1825.1	3457.86	1226.23	2028.56	1345.02	1380.33	1771.75	814.872	479.11	455.409	811.504	911.984	642.852	-1.24495	0.0146202	-0.621287	0.119229	-0.0123843	0.533836	-0.330369	0.152341	-0.0392737	1
H2-T24	5839.66	5349.08	4107.69	3068.82	3988.3	4836.32	2657.02	942.004	752.332	4688.51	1947.21	3596.46	5128.96	1720.91	4088.6	4116.59	3058.02	1947.46	3503	3786.4	2055.34	770.071	1376.47	894.906	1126.71	632.689	1145.08	-1.71024	0.00128559	-0.693126	0.0984703	-0.0208049	0.415758	-0.710711	0.0282894	0.037248	1
Has2	46.2208	55.3656	67.8274	57.4896	55.011	37.1792	37.9424	50.5326	87.6951	45.0819	103.786	14.3783	63.3113	46.6816	40.3895	32.4682	16.9785	17.2016	7.42733	14.2793	65.2263	69.3148	14.0456	18.1861	21.2158	32.2994	29.7319	-1.24393	0.00138722	-0.834701	0.0353834	-0.00282603	0.801448	0.246663	0.361728	-0.284051	0.293582
Hcar2	184.883	270.537	413.582	192.465	87.3001	187.906	177.065	137.296	83.0796	151.568	49.4217	152.535	46.18	51.7283	47.9626	155.473	662.163	81.0931	37.8118	30.9385	156.685	188.503	24.9699	22.7326	25.0043	89.2984	40.1782	-1.47662	0.0209703	-0.293477	0.306626	-0.000945406	1	-0.425885	0.10436	-0.0920168	0.653538
Hcls1	2568.55	1244.47	2148.97	1854.66	629.039	1697.18	654.507	415.702	1693.9	1894.22	3790.64	1275.3	808.895	199.343	1455.71	2793.51	613.114	629.086	629.297	568.793	1161.31	1295	136.554	221.264	399.311	1567.47	477.317	-1.82997	0.00203465	-0.803342	0.073928	-0.0010106	1	-0.115475	0.823571	-0.0206604	1
Herc6	1896.37	1434.47	4033.25	2117.12	1509.22	1157.58	2171.15	999.211	230.777	1563.87	859.937	2256.15	2492.23	833.961	1076.21	1247.53	1818.59	2527.4	1540.16	1432.69	1220.16	601.856	429.95	401.609	499.328	554.79	675.798	-1.6477	0.000523321	-0.343795	0.266985	-0.00410853	0.802476	-1.60771	0.000895754	-0.0950016	0.834787
Hist1h1b	315.622	276.828	132.346	154.972	120.785	330.594	46.3741	65.7878	73.8485	293.032	375.605	215.05	157.161	39.1116	259.166	571.315	66.0276	126.554	22.9572	46.8044	266.577	282.331	26.5305	34.8566	37.1276	105.448	84.3743	-1.00647	0.0346154	-0.223105	0.432957	-0.0139637	0.646926	-0.00467313	1	-0.0735415	0.804566
Hist1h2ab	120.174	95.6316	82.7163	98.7322	32.2891	127.615	15.8094	23.8361	50.7708	194.318	168.034	164.413	96.0842	18.925	201.948	443.316	34.9003	66.3489	16.8803	30.9385	166.611	148.773	5.46216	10.6085	18.185	56.999	49.0174	-1.19918	0.0272171	-0.235103	0.401199	-0.075492	0.265143	-0.0797143	0.941333	-0.0746256	0.779982
Hist1h2ae	126.777	91.8566	58.7286	53.1154	25.1137	149.722	23.187	34.324	23.0777	109.596	103.786	156.911	76.7184	25.2333	118.644	262.867	36.7868	81.0931	9.45296	9.51955	100.675	80.3038	13.2653	15.1551	4.54624	25.6495	27.3212	-1.21639	0.0272171	-0.183363	0.501509	-0.231162	0.118936	-0.0607772	1	-0.100958	0.608666
Hist1h2af	96.4033	99.4065	67.8274	82.4851	53.8151	130.63	33.7266	34.324	50.7708	147.682	177.918	156.286	101.298	17.6633	164.083	325.306	30.1841	105.667	23.6324	39.6648	209.15	137.784	8.5834	9.85078	12.881	58.8989	35.3568	-1.10785	0.0281101	-0.436006	0.197675	-0.0596212	0.2909	-0.149945	0.576338	-0.123776	0.5291
Hist1h2ak	409.384	351.069	138.963	147.473	141.115	487.35	61.1295	76.2757	78.464	326.455	227.34	332.577	205.576	51.7283	339.104	603.159	55.6519	183.074	34.4358	34.1117	295.645	190.193	35.8942	40.9186	34.8545	111.148	61.8745	-1.15462	0.0272171	-0.316235	0.29287	-0.0183586	0.573301	-0.00734053	1	-0.0597301	0.883934
Hist1h2bb	301.095	262.987	149.717	184.342	102.847	367.773	57.9676	61.974	92.3106	391.746	336.067	305.696	219.728	39.1116	350.884	799.841	77.3467	254.337	59.4186	61.8771	358.036	270.497	25.7502	47.7384	35.6122	88.3484	98.8384	-1.08921	0.028829	-0.233376	0.413164	-0.0757816	0.243524	-0.0967394	0.871332	-0.096375	0.678066
Hist1h2bl	363.163	231.529	58.7286	75.6113	106.434	364.759	64.2914	61.0205	23.0777	145.35	153.207	132.531	81.1874	40.3733	146.412	402.106	66.0276	184.302	19.5811	21.419	150.304	132.713	13.2653	37.8876	9.09248	63.6489	25.7141	-1.18688	0.0272171	-0.259113	0.354717	-0.0527162	0.34623	-0.0738583	0.967116	-0.0906698	0.662661
Hist1h2bm	137.342	111.99	76.9262	94.9828	66.9699	223.075	53.7518	39.0913	0	134.468	14.8265	235.68	35.7523	35.3266	125.376	281.599	51.8789	82.3217	14.8547	19.8324	239.636	103.972	5.46216	3.03101	2.27312	22.7996	25.7141	-1.81165	0.014162	-0.488179	0.140562	-0.303452	0.118936	-0.147498	0.482983	-0.127686	0.37472
Hist1h2bn	141.303	123.314	70.3089	83.7349	38.2685	218.051	21.0791	29.5568	23.0777	99.491	143.323	104.399	49.9042	27.7566	127.9	258.497	32.0706	97.0659	20.2563	18.2458	124.072	92.9833	10.144	12.8818	9.85018	41.7992	18.482	-1.6854	0.0092169	-0.431619	0.198944	-0.0532	0.31022	-0.119551	0.739618	-0.0826075	0.755807
Hist1h3d	312.981	290.67	81.8892	64.9883	114.806	356.72	38.9964	81.0429	36.9242	121.255	197.687	166.914	94.5946	65.6066	144.729	304.077	69.8007	165.872	23.6324	23.7989	146.05	107.353	50.7201	38.6454	18.185	38.9493	33.7497	-1.25295	0.0251781	-0.276489	0.350357	-0.0582739	0.263837	-0.0517546	1	-0.0802378	0.803166
Hist1h3i	657.655	497.033	87.6793	68.7376	222.436	766.696	123.313	109.646	32.3087	188.1	197.687	149.41	108.746	80.7466	177.546	367.765	87.7224	293.655	19.5811	24.5922	153.849	120.033	59.3035	51.5272	19.7004	64.5988	21.6962	-1.23597	0.0272171	-0.36758	0.241477	-0.0336282	0.424941	-0.0525241	1	-0.0651485	0.840738
Hist1h4j	227.142	111.99	75.2719	74.9865	71.7535	273.318	40.0504	61.974	46.1553	147.682	98.8434	206.298	39.4765	29.0183	120.327	279.726	43.3896	114.267	41.1879	43.6313	179.372	104.818	23.4093	33.3411	14.3964	44.6492	40.1782	-1.23245	0.0251781	-0.417881	0.212271	-0.0200002	0.529024	-0.105629	0.84474	-0.102728	0.67564
Hoxc10	0	0	0	0	0	0	0	0	613.866	0	261.935	0	0	0	0	0	0	0	0	0	0	0	0	0	0	0	0	0	1	-6.87718	0.0334824	0	1	0	1	0	1
Hoxc8	5.28237	2.51662	0	0	0	0	0	0.953446	1181.58	0	617.771	0	0	1.26167	0	0	0	0	0.675211	0	0	0	0	0	0	0	0	-25.7857	1.28e-05	-15.6518	0.0107147	-19.5973	0.00849602	-21.1372	0.00143458	0	1
Hpgds	474.093	265.503	408.619	446.169	130.352	439.117	238.194	400.447	581.557	143.018	1116.93	101.899	146.733	54.2516	176.704	398.36	288.635	222.392	282.914	246.715	331.803	696.53	23.4093	125.029	59.8588	387.593	102.856	-1.60392	0.00439924	-0.951577	0.0471662	-0.000261188	1	-0.305859	0.180501	-0.162978	0.46597
Hsh2d	212.615	78.0152	92.6423	73.1118	68.1658	103.499	109.612	35.2775	13.8466	92.4955	69.1904	96.2723	59.5871	20.1867	40.3895	96.7802	87.7224	84.7791	52.6665	50.7709	82.2419	23.6685	21.8487	18.9438	20.4581	25.6495	52.2317	-1.07798	0.027628	-0.196972	0.489434	-0.00194577	1	-0.209116	0.358071	-0.0625093	0.883027
Hspa1a	1004.97	991.548	1390.46	1266.65	403.015	394.904	69.5611	95.3446	23.0777	87.8319	29.653	853.948	329.219	95.8866	845.656	1087.06	467.853	2183.37	155.299	179.285	124.781	78.6132	75.69	62.1357	152.299	64.5988	87.5885	-2.54605	0.000637709	-0.154609	0.584326	-0.0205756	0.594986	-1.25668	0.0173529	0.0591546	0.847595
Hspa1b	1475.1	1635.8	2079.49	1956.52	534.564	507.446	89.5863	132.529	69.233	127.473	103.786	1284.05	386.571	118.597	1156.15	1480.42	650.844	4047.28	204.589	241.162	194.97	86.2209	76.4703	64.409	175.788	67.4488	81.9636	-3.35269	3.92e-05	-0.270194	0.336937	-0.0614664	0.317892	-2.70654	0.000953967	0.0412773	0.959761
Hspe1-rs1	9.24415	1.25831	0.827163	1.24977	0	5.02422	9.48561	2.86034	32.3087	4.66364	108.728	23.1304	14.1519	1.26167	22.7191	60.5656	2.82976	2.45737	10.8034	12.6927	0.708982	0	1.56062	0.757753	0.757706	0.949983	6.42852	-0.140269	0.657744	-0.183703	0.405089	-1.05394	0.0472049	-0.120083	0.538235	0.0172893	1
Hsph1	931.018	1207.98	1865.25	1694.69	725.906	674.251	322.511	511.047	609.25	441.491	513.986	1121.51	717.28	317.94	1780.51	2337.08	400.882	705.264	295.067	333.977	528.9	559.591	319.927	263.698	347.787	417.992	401.782	-1.69398	0.000154632	-0.441443	0.188932	-0.0861101	0.128079	-0.106018	0.94881	0.0257052	1
Htr7	58.1061	20.133	25.6421	14.9973	14.3507	20.0969	16.8633	15.2551	23.0777	23.3182	74.1325	18.7543	8.19323	12.6167	17.6704	38.7121	3.77301	7.3721	5.40169	7.13966	21.2694	16.9061	2.34093	6.81977	13.6387	4.74991	16.8749	-1.31998	0.0209855	-0.210673	0.464667	-0.0273405	0.422594	0.0648582	1	-0.102072	0.701125
I830077J02Rik	427.872	210.138	202.655	116.229	90.8878	232.119	169.687	86.7636	101.542	174.887	390.431	116.277	45.4352	63.0833	118.644	177.951	108.474	52.8334	73.598	79.3296	158.103	124.26	86.6143	67.44	64.405	67.4488	124.552	-1.10185	0.0212595	-0.183155	0.543178	-0.000798453	1	0.0156581	1	-0.0812788	0.878666
Ifi202b	2687.41	1162.68	1363.99	914.21	343.221	1339.46	660.831	381.378	1269.27	659.905	2505.68	451.98	620.451	151.4	551.99	1771.39	466.91	471.814	203.239	232.436	380.014	229.922	59.3035	97.7501	36.3699	249.845	163.124	-3.71843	7.86e-07	-1.79843	0.00350865	-0.365054	0.0755751	-0.287579	0.193592	-0.071022	0.815525
Ifi203	5524.04	2837.49	2698.21	2033.38	1155.23	3108.99	1882.37	1084.07	2723.16	1268.51	3301.37	1159.02	1311.66	912.184	1340.43	2624.93	2172.31	1803.71	1670.47	1794.43	1084.03	921.38	781.089	894.906	373.549	199.496	636.423	-2.32009	2.97e-06	-1.08595	0.02513	-0.212429	0.0749425	-0.973028	0.0107008	-0.0986096	0.805164
Ifi204	3172.06	1361.49	1368.13	752.364	492.707	1576.6	826.302	326.078	1587.74	850.337	2634.18	543.251	697.914	123.643	538.527	1816.35	531.994	694.206	249.828	259.408	436.733	166.525	53.061	103.054	58.3434	153.897	137.41	-3.95094	6.25e-07	-2.21934	0.000983547	-0.928683	0.029744	-0.554228	0.068077	-0.0690357	0.812291
Ifi205	499.184	255.437	253.939	123.728	129.156	336.623	179.173	95.3446	863.104	171.777	1359.1	95.022	139.285	103.457	112.754	349.033	83.0062	154.814	42.5383	62.6704	65.9353	31.2762	17.1668	27.2791	40.1584	109.248	69.1065	-2.06399	0.0020934	-1.35163	0.0159738	-0.0170751	0.600422	-0.11582	0.763885	0.0155941	1
Ifi206	476.734	104.44	55.4199	11.248	17.9384	108.523	38.9964	8.58101	4.61553	51.3001	69.1904	20.0046	11.9174	1.26167	10.0974	96.1558	22.6381	61.4341	4.72648	2.37989	17.0156	0.845303	0	0.757753	0	0.949983	2.41069	-6.91706	5.2e-05	-0.483527	0.0980061	-3.04225	0.0178926	-0.338076	0.122272	-0.0761111	0.515028
Ifi207	7240.81	3042.59	1573.26	1029.19	832.341	4058.57	1498.73	987.77	2940.09	976.256	4640.7	511.994	564.588	358.313	1034.14	2385.79	1262.07	1786.5	427.409	472.804	651.554	421.806	112.365	273.549	127.295	738.137	205.713	-3.04375	5.04e-05	-1.72151	0.00556959	-0.0116536	0.739956	-0.267025	0.2172	-0.0266672	1
Ifi209	1147.6	397.626	501.261	238.707	124.373	430.073	295.108	92.4842	110.773	375.423	726.499	220.676	157.906	20.1867	178.387	637.5	210.345	281.368	122.888	87.2625	146.759	55.79	26.5305	23.4903	16.6695	23.7496	49.0174	-4.00225	4.6e-06	-0.948328	0.0459554	-2.14479	0.0110477	-0.899817	0.0332277	-0.0898944	0.65517
Ifi211	352.598	163.58	473.965	234.958	96.8672	239.153	135.96	78.1825	318.472	351.328	894.533	285.691	351.564	44.1583	222.142	420.838	125.453	173.244	127.615	120.581	170.865	68.4695	11.7046	15.1551	31.066	66.4988	47.4103	-3.1012	4.28e-07	-2.20506	0.000161186	-0.839301	0.0256683	-1.91111	0.00186182	-0.0817938	0.817851
Ifi213	72.6326	20.133	55.4199	20.6213	10.763	25.1211	35.8345	5.72067	4.61553	15.5455	14.8265	15.6286	5.95871	7.56999	4.20724	9.99021	17.9218	23.345	8.77775	6.34636	7.08982	1.69061	1.56062	6.06202	1.51541	0.949983	3.21426	-3.3427	2.57e-05	-0.425109	0.190382	-0.0115861	0.763409	-0.696052	0.049691	-0.0571363	0.860164
Ifi214	389.575	118.281	181.976	69.3625	27.5055	143.693	102.234	18.1155	32.3087	90.1637	123.554	82.5191	67.0355	2.52333	38.7066	232.272	57.5384	84.7791	31.0597	32.5251	53.8826	2.53591	0.780309	2.27326	1.51541	0.949983	12.857	-6.18028	3.7e-06	-1.38784	0.0191511	-5.28955	0.00169392	-2.19902	0.00778509	-0.112169	0.385887
Ifi27l2a	6365.26	4105.87	2816.49	1913.4	2211.2	5576.89	2419.88	1462.59	1172.34	2687.03	2836.8	2703.75	2979.36	871.811	2160.84	5665.07	2154.39	5994.74	588.784	557.687	2752.98	413.353	156.062	225.81	317.479	135.848	493.389	-3.09776	7.34e-05	-1.23325	0.0232052	-3.23608	0.00303878	-1.32609	0.0156574	-0.127559	0.447263
Ifi35	1397.19	1080.89	1453.33	1035.44	1067.93	997.811	822.086	613.066	383.089	1417.75	820.4	1279.05	1695.25	533.685	1009.74	1211.31	806.481	1138.99	896.681	831.374	799.022	459.845	323.048	337.958	668.297	524.391	486.96	-1.15965	0.00188958	-0.484882	0.134966	-0.00278364	0.776072	-0.525992	0.0265687	0.00257186	1
Ifi44	14222.8	6161.94	5258.28	2931.35	3497.98	6688.24	4474.05	1727.64	849.258	2666.83	3350.79	2082.98	2858.69	669.944	2176.83	5161.82	3872.05	3758.54	1205.25	1163.76	1632.08	483.513	330.071	377.361	149.268	261.245	448.389	-4.06021	7.71e-08	-1.91811	0.00200808	-2.93013	0.00248088	-2.00461	0.00299602	-0.102541	0.654601
Ifi44l	1971.65	654.321	956.201	567.397	376.706	949.578	451.093	155.412	258.47	502.896	1121.87	416.972	353.054	47.9433	384.542	1234.42	349.947	226.078	209.991	214.983	405.538	66.7789	21.8487	25.7636	29.5505	39.8993	106.071	-4.54507	4.28e-07	-2.43618	0.00113535	-2.78159	0.00591643	-0.924262	0.0319737	-0.0814118	0.702604
Ifi47	2554.03	1550.24	1249.02	717.995	632.627	1431.9	643.968	336.566	627.712	735.301	1339.33	532.623	607.789	315.416	610.892	1378.02	777.24	557.822	457.118	466.458	525.355	324.596	503.299	359.175	130.325	272.645	261.962	-1.92632	0.000241587	-0.464493	0.187514	-0.0103396	0.60037	-0.182973	0.535696	-0.020031	1
Ifih1	4797.71	3012.39	4303.73	2538.92	1850.04	2937.16	2544.25	1470.21	996.955	2089.31	2184.44	2021.09	2311.98	1019.43	1677.01	2934	2289.27	2490.54	1330.84	1454.11	1678.87	1176.66	1110.38	1138.9	575.099	1042.13	1025.35	-1.59736	0.000188255	-0.292255	0.323411	-0.00370396	0.776072	-0.295773	0.223335	-0.0846925	0.901778
Ifit1	7630.39	4724.95	5122.62	2175.86	1891.9	3908.85	2590.63	1406.33	724.638	2090.87	1937.33	1917.32	2171.21	378.5	1418.68	3253.69	2298.71	2169.85	927.74	924.189	1126.57	389.685	356.601	378.119	121.991	317.294	372.854	-3.5925	1.19e-07	-1.4505	0.0107147	-0.675772	0.0346258	-1.15744	0.0146401	-0.0865807	0.775343
Ifit1bl1	1097.41	364.91	378.014	89.9837	83.7124	263.269	140.176	61.0205	46.1553	295.364	331.125	76.2677	67.0355	27.7566	34.4994	394.613	68.8574	90.9225	43.2135	60.2905	70.1892	27.0497	49.1595	37.1299	17.4272	18.9997	30.5354	-3.31911	5.19e-05	-0.241379	0.377551	-0.17115	0.160612	-0.113506	0.725042	-0.0584031	0.843269
Ifit1bl2	252.233	329.677	144.754	79.3607	107.63	210.012	114.881	81.9963	18.4621	160.118	118.612	103.774	100.553	42.8966	53.0113	121.756	170.729	87.2365	71.5724	59.4972	74.4431	32.9668	58.5232	33.3411	46.2201	17.0997	50.6246	-1.45962	0.0111321	-0.201236	0.48851	-0.00193145	1	-0.21358	0.370661	-0.0401413	1
Ifit2	6999.14	2873.98	3772.69	1377.88	908.878	2564.36	1561.96	779.919	1421.58	1973.5	3548.48	991.48	1193.98	358.313	836.4	2917.77	1244.15	1398.24	927.74	864.692	847.942	463.226	509.542	500.117	306.871	387.593	535.977	-2.61941	1.17e-05	-0.547994	0.152972	-0.0256173	0.422594	-0.248529	0.271358	-0.0454579	0.988437
Ifit3	9238.87	4828.14	8652.96	3767.44	2192.07	4625.3	3461.19	1390.12	1384.66	4716.5	2392.01	4305.37	5974.35	449.153	2329.97	5411.57	2935.4	3913.35	2000.65	1949.13	2579.98	890.949	429.95	517.545	355.364	1111.48	695.083	-2.91812	7.91e-06	-1.0247	0.0402471	-0.0310583	0.405862	-1.08189	0.0173529	-0.0743738	0.823775
Ifit3b	5040.7	2828.68	2675.87	1163.54	1014.12	2452.83	1261.59	479.583	461.553	1890.33	1467.82	1327.81	1923.92	180.418	767.401	2111.68	1243.21	1290.12	620.519	594.178	797.604	231.613	225.509	197.773	200.034	147.247	250.712	-3.25687	3.7e-06	-1.05851	0.036265	-0.244511	0.0988745	-0.767117	0.0370684	-0.0597984	0.89193
Ifitm3	18119.9	14021.3	9461.09	7196.2	6566.64	13401.6	6659.95	3809.02	5626.33	8740.44	10235.2	7569.88	8694.51	3821.59	8268.92	13589.2	6457.5	7177.96	2758.24	2848.72	4696.29	2774.28	4197.28	3862.27	1665.44	2775.85	2837.39	-1.63249	0.000589464	-0.48561	0.169668	-0.0461195	0.211086	-0.130283	0.833481	-0.00559308	1
Ighm	2309.72	1166.45	914.843	1091.68	502.274	1963.47	564.921	434.771	1878.52	659.905	1487.59	524.496	324.75	155.185	583.124	1494.79	594.249	567.651	480.751	472.804	761.446	735.414	117.046	288.704	176.546	53.199	265.176	-2.68508	2.02e-05	-1.60168	0.00556959	-0.0942278	0.187887	-0.338835	0.145285	-0.110404	0.651905
Igtp	1118.54	728.562	1301.13	665.505	413.779	629.033	438.446	297.475	226.161	618.71	751.21	633.272	592.147	191.773	558.722	744.895	464.08	605.741	316.674	308.592	421.844	213.016	242.676	209.897	125.022	198.546	191.248	-1.90497	2.43e-05	-0.421868	0.202646	-0.0101059	0.530911	-0.353653	0.131288	-0.0391631	1
Iigp1	3852.17	2278.8	2689.11	1500.35	1085.87	2115.2	2073.13	999.211	849.258	832.46	1625.97	1048.37	1377.95	622.001	761.511	1537.87	1746.9	1378.58	661.707	743.318	821.001	557.9	806.059	679.704	171.999	362.893	437.943	-2.08852	9e-06	-0.548291	0.140964	-0.0149315	0.444241	-0.336402	0.148555	-0.104921	0.798548
Ikzf1	2255.57	1186.59	991.769	946.704	519.017	1538.42	628.158	463.375	1024.65	859.665	2248.69	573.258	329.964	209.437	705.976	1572.83	530.108	328.058	456.443	459.318	709.691	753.165	301.98	322.045	247.77	614.639	497.406	-1.52354	0.00410778	-0.481962	0.179898	-0.000979833	1	-0.030124	1	-0.0457645	1
Il10ra	1267.77	478.158	1148.93	1080.43	520.213	714.444	777.82	426.19	766.178	895.419	1398.63	885.205	359.012	171.587	476.26	741.149	753.658	706.493	707.622	606.871	936.565	735.414	131.092	190.196	358.395	694.437	576.156	-1.15878	0.014011	-0.497439	0.163241	-9.28e-05	1	-0.338821	0.146779	-0.098916	0.820042
Il12b	55.4649	10.0665	23.9877	21.2462	9.56713	43.2083	14.7554	3.81378	13.8466	18.6546	29.653	12.5029	8.93807	1.26167	8.41449	42.4584	16.0353	17.2016	8.77775	6.34636	17.0156	16.0608	4.68185	3.78876	1.51541	0.949983	7.23208	-1.50501	0.0251781	-0.30138	0.259339	-0.0230922	0.646926	-0.146872	0.475759	-0.0638015	0.756009
Il18	294.492	99.4065	110.84	73.7367	90.8878	147.712	101.18	115.367	175.39	42.75	276.761	66.2653	56.6078	66.8683	68.9988	113.014	74.5169	153.585	46.5896	30.9385	51.0467	64.243	45.2579	67.44	26.5197	57.949	35.3568	-1.15703	0.0201136	-0.512014	0.162724	-0.00125048	1	-0.111243	0.889132	-0.0346263	1
Il1b	1016.86	1358.97	2816.49	1609.08	399.428	1055.09	877.946	228.827	581.557	1556.1	993.376	1277.17	366.461	242.24	555.356	1630.28	2293.99	1008.75	613.767	561.653	873.465	1251.89	263.744	214.444	266.713	839.785	566.513	-1.01131	0.0320734	-0.132155	0.687562	-0.000622875	1	-0.360546	0.130302	-0.0601726	0.895532
Il1rn	1792.04	1556.53	1670.87	589.269	263.096	1354.53	533.302	273.639	235.392	602.387	864.879	271.938	163.865	42.8966	183.436	863.529	1336.59	342.802	74.9485	63.4636	280.048	472.524	52.2807	90.1726	34.0968	383.793	96.4277	-2.19949	0.00595826	-0.316694	0.251357	-0.00108128	1	-0.176887	0.373352	-0.0363549	0.95745
Il21r	401.46	173.647	282.063	233.708	117.197	234.129	135.96	89.6239	166.159	231.628	469.506	196.921	127.367	32.8033	117.803	333.423	156.58	152.357	112.085	72.9832	260.196	230.768	7.02278	34.0989	43.1893	86.4484	86.785	-2.07483	0.00103091	-0.685616	0.102385	-0.00535355	0.946427	-0.283994	0.202139	-0.126383	0.549207
Il27	36.9766	8.80817	23.1606	11.8729	8.37124	8.03876	8.43165	2.86034	0	27.9818	29.653	15.6286	5.21387	3.785	9.25594	9.36582	12.2623	6.14341	4.05127	7.13966	9.21676	7.60773	2.34093	0	6.81936	3.79993	4.01782	-1.73528	0.0080647	-0.200923	0.461433	-0.00252417	1	-0.190202	0.386101	-0.0337969	1
Il2ra	246.951	85.5651	23.1606	5.62398	21.526	171.828	49.536	18.1155	41.5398	40.4182	29.653	33.7578	36.4971	8.83166	27.7678	128.624	17.9218	19.6589	6.0769	5.55307	29.0682	3.38121	3.90155	9.09303	10.6079	0.949983	11.2499	-1.2494	0.0272171	-0.372259	0.184085	-0.471157	0.0963454	-0.0381392	1	-0.0298383	0.975777
Ipcef1	303.736	167.355	170.396	158.096	81.3206	209.008	119.097	68.6481	207.699	159.341	266.877	104.399	51.3939	37.85	130.425	176.077	112.247	54.062	99.9313	82.5027	92.8766	135.248	46.8185	50.7694	53.7972	102.598	117.32	-1.23379	0.0127176	-0.447615	0.194744	-0.00033427	1	-0.0696856	1	-0.0177661	1
Irf5	2720.42	1097.25	930.559	842.973	597.946	1833.84	650.291	410.935	913.875	973.146	2214.09	823.941	400.723	244.763	705.134	1655.88	627.263	640.144	487.503	440.279	732.378	584.104	221.608	362.206	354.607	740.987	445.978	-1.15149	0.0251781	-0.363572	0.257053	-0.000660618	1	-0.0658064	1	-0.0057201	1
Irf7	27014.1	12154	10005.4	4721.02	6417.15	17115.5	7424.07	2209.13	3780.12	11938.9	9676.77	11645.8	12442.5	929.848	8873.92	18551.2	3927.7	11369	1814.29	1792.85	5627.9	519.016	257.502	289.462	281.109	634.589	707.94	-4.55443	3.7e-06	-2.57169	0.00150877	-3.8164	0.00224773	-1.65537	0.0107493	-0.0836214	0.65298
Irf9	2712.5	2215.88	1895.03	1577.84	1882.33	2409.62	1685.28	1039.26	1066.19	1372.67	1472.77	1699.14	1728.77	990.408	1304.25	2001.16	1737.47	1904.46	1164.74	1228.81	1350.61	728.651	714.763	716.076	405.373	588.039	756.154	-1.53575	2.68e-05	-0.952506	0.0160299	-0.040467	0.169065	-0.601051	0.0159602	-0.103188	0.876451
Irgm1	4441.15	2691.53	2966.21	1826.54	1103.81	2696	1566.18	982.049	1264.66	1542.11	2406.84	1569.74	1756.33	571.535	1257.97	3024.54	1507.32	2075.25	977.706	1001.93	1215.19	584.95	555.58	578.923	318.237	539.59	582.584	-2.17178	1.87e-05	-0.694932	0.0962902	-0.0547422	0.211086	-0.400006	0.100268	-0.0764116	0.889182
Irgm2	3543.15	2292.64	2181.23	1313.51	1052.38	2197.59	986.504	580.648	673.868	1080.41	1467.82	1160.89	1149.29	545.04	1213.37	2116.68	1230.94	722.465	1010.12	940.849	808.239	431.95	681.21	572.103	234.131	379.993	409.014	-1.98931	5.68e-05	-0.56839	0.136752	-0.0179094	0.424941	-0.283883	0.225832	-0.00335378	1
Isg15	3647.48	2699.08	1955.41	1014.19	1708.93	2137.3	1271.07	520.581	272.316	1752.75	1665.51	1535.36	1717.6	471.863	1611.37	2239.68	900.806	2233.75	318.7	295.106	1010.3	257.817	324.609	93.9613	103.806	122.548	236.248	-2.88725	3.15e-05	-0.964475	0.0469142	-2.21529	0.00734709	-0.52654	0.0716033	-0.0777925	0.788392
Kcnab2	705.197	380.01	409.446	415.55	208.085	541.611	229.763	225.013	650.79	371.537	1196	312.572	175.037	83.2699	365.189	641.247	177.331	195.361	274.136	268.134	338.893	380.386	53.061	121.24	181.85	617.489	192.052	-1.00808	0.0272171	-0.542833	0.153425	-0.000159619	1	-0.0581734	1	-0.00993981	1
Kcnj10	171.677	96.8899	134	151.848	59.7946	75.3633	48.482	96.298	115.388	50.5228	168.034	28.1315	63.3113	49.205	76.5718	75.551	44.3328	28.2597	89.1279	95.1955	146.759	201.182	20.288	46.9807	28.7928	116.848	36.964	-1.54247	0.000320829	-0.410763	0.204082	-0.000253871	1	-0.0985921	0.989743	-0.246976	0.338394
Kif11	287.889	222.721	115.803	149.348	99.259	331.599	95.9101	96.298	46.1553	200.537	207.571	175.041	112.471	71.9149	222.142	337.794	116.963	105.667	45.2392	52.3575	222.62	218.088	27.3108	36.3721	31.066	94.0483	77.9458	-1.0712	0.0272171	-0.312179	0.307269	-0.0173746	0.524892	-0.0735927	1	-0.117407	0.647922
Kif15	139.983	144.706	100.087	93.7331	98.0631	180.872	70.6151	65.7878	32.3087	92.4955	88.959	116.277	96.8291	55.5133	79.0962	156.097	129.226	132.698	35.7862	35.6983	151.722	157.226	21.8487	25.7636	25.0043	43.6992	50.6246	-1.04992	0.0272171	-0.330783	0.285609	-0.00735763	0.726029	-0.219159	0.370661	-0.165612	0.467399
Kif2c	109.609	110.731	61.2101	58.1145	45.4439	102.494	28.4568	40.0447	50.7708	66.8455	207.571	66.2653	37.2419	23.9716	81.6205	134.868	41.5031	51.6047	17.5555	19.0391	100.675	122.569	5.46216	13.6395	5.30394	63.6489	23.3034	-1.58552	0.00993416	-0.492897	0.173305	-0.00637087	0.867535	-0.103139	0.855623	-0.116636	0.604584
Klra2	606.152	196.296	371.396	266.827	96.8672	289.395	166.525	84.8567	87.6951	231.628	350.894	212.549	92.36	34.065	103.498	317.189	107.531	158.5	90.4783	75.3631	121.945	114.961	69.4475	79.564	28.0351	115.898	95.6242	-1.70181	0.00488558	-0.156801	0.606999	-0.000890424	1	-0.06685	1	-0.0469096	0.978156
Klrk1	198.089	41.5242	51.2841	19.3715	19.1343	66.3197	79.0468	11.4413	78.464	18.6546	187.802	32.5075	20.1107	8.83166	10.0974	109.268	57.5384	11.0581	16.2051	15.0726	34.7401	11.8342	3.12124	9.85078	6.06165	0.949983	27.3212	-1.92185	0.0124757	-0.321625	0.24036	-0.325346	0.11699	-0.145239	0.481585	-0.0775835	0.648219
Lacc1	898.003	508.357	379.668	330.565	284.622	545.631	415.259	339.427	456.938	257.278	642.482	231.304	203.341	273.781	266.739	438.32	472.569	464.442	212.692	177.698	248.853	290.784	159.183	221.264	108.352	253.645	272.408	-1.07628	0.012449	-0.28102	0.342759	-0.00138598	1	-0.167972	0.682894	-0.0918611	0.876655
Lag3	113.571	42.7825	114.149	79.9855	68.1658	51.2471	57.9676	43.8585	69.233	113.482	138.381	91.2711	122.898	35.3266	91.7179	66.8095	43.3896	76.1783	52.6665	53.1508	98.5485	70.1601	21.0683	17.4283	50.7663	43.6992	44.9996	-1.10622	0.00588469	-0.670475	0.0771001	-0.00133603	1	-0.32446	0.173226	-0.0995899	0.873952
Lair1	1011.57	459.283	718.805	702.998	210.477	670.231	430.014	410.935	452.322	347.441	850.053	287.567	195.893	104.718	271.788	596.915	412.201	262.938	311.948	280.033	419.717	619.607	85.834	197.773	88.6516	322.044	221.784	-1.85972	0.000217178	-0.572712	0.135416	-0.000745855	1	-0.213787	0.422681	-0.1675	0.514571
Lama1	105.647	269.278	181.976	216.211	196.126	116.562	76.9388	94.3911	92.3106	273.6	59.306	324.45	355.288	148.877	225.508	125.502	66.9709	122.868	62.7947	74.5698	233.964	255.281	63.205	59.1047	71.9821	68.3988	98.8384	-1.24645	0.00080733	-0.408153	0.186545	-0.0073605	0.48931	-0.0426579	1	-0.212971	0.518178
Laptm5	9600.71	4450.64	3712.31	3558.73	2681.19	6578.72	2690.75	2580.02	3143.18	4188.73	7146.38	3194.49	1611.83	922.278	3566.9	5811.18	3061.8	1827.05	2532.04	2367.99	3444.23	2928.13	884.09	1679.18	1201.72	3599.48	1821.68	-1.16304	0.0214479	-0.450659	0.195112	-0.000398888	1	-0.0951187	0.962476	-0.0254507	1
Lcp1	14451.2	11527.4	9265.06	9402.05	4119.85	15747.9	4853.47	4372.5	6332.51	9230.12	15894	5308.73	3460.52	2206.65	7244.87	13024.7	4717.2	2452.45	3588.07	3454.01	6831.04	9117.44	3338.16	4017.6	2153.4	6745.83	4249.25	-1.09015	0.0226513	-0.305291	0.31629	-0.000389867	1	0.0436724	1	-0.0456512	1
Lcp2	2062.77	1089.7	1363.17	1204.78	519.017	1395.73	622.888	531.069	664.636	883.76	2352.47	601.389	408.917	199.343	599.953	1287.49	736.68	568.88	447.665	370.469	694.093	982.242	180.251	226.568	231.858	1143.78	324.64	-1.54037	0.00566747	-0.445183	0.199242	-0.000217427	1	-0.120998	0.821955	-0.0462463	0.994747
Lemd1	14.5265	12.5831	57.9014	41.2425	11.9589	8.03876	40.0504	30.5103	0	10.8818	0	48.1361	21.6003	2.52333	8.41449	7.49266	49.0491	63.8915	28.3589	34.1117	76.57	59.1712	2.34093	3.78876	6.06165	26.5995	17.6784	-0.293256	0.350389	-0.0656271	0.961312	0.000373131	1	-1.03465	0.0232529	-0.194397	0.231249
Lgals3bp	6984.62	4683.43	10870.6	7199.95	6399.22	3988.23	6114	4141.77	1513.89	11449.2	4151.42	9693.49	8679.61	2435.01	7131.28	5985.38	5248.25	3224.06	3778.48	3638.05	7980.3	3139.46	1449.81	1597.34	1664.68	4622.62	2184.89	-1.14713	0.0145433	-0.533297	0.146631	-0.0017081	1	-0.268418	0.269268	-0.070447	0.937239
Lgals9	9639.01	8346.37	4398.85	3095.69	3647.47	6702.31	2919.46	2094.72	2926.25	4288.22	3845.01	3541.44	4390.83	1739.84	4091.97	5733.13	3044.82	3629.53	1891.94	1869.8	2828.13	1592.55	1901.61	1826.94	1100.95	1465.82	1335.52	-1.70405	9.01e-05	-0.671233	0.088579	-0.014494	0.414645	-0.195129	0.55392	-0.0120692	1
Lilra5	320.904	140.931	100.087	99.9819	39.4644	225.085	107.504	66.7412	60.0019	78.5046	108.728	73.1419	32.0281	61.8216	112.754	121.756	70.7439	71.2636	43.2135	30.1452	102.093	114.961	63.9853	37.8876	25.0043	55.099	53.0353	-1.13721	0.0243811	-0.221555	0.452703	-0.00174699	1	-0.00284419	1	-0.0887222	0.818962
Lpxn	718.403	283.12	246.495	190.591	127.96	614.965	182.335	144.924	203.083	287.591	573.292	203.172	150.457	35.3266	203.631	740.524	162.239	258.023	89.1279	78.5363	211.986	172.442	31.2124	62.8935	36.3699	268.845	73.9279	-1.18152	0.0272171	-0.378799	0.227229	-0.00253887	1	-0.0933384	0.85879	-0.0390233	0.979322
Lrrc4	143.945	71.7237	105.05	90.6086	27.5055	38.1841	32.6727	36.2309	9.23106	26.4273	59.306	25.6309	36.4971	23.9716	25.2435	23.1024	20.7515	24.5737	14.1794	18.2458	48.2108	48.1823	22.629	22.7326	13.6387	41.7992	22.4998	-1.82629	6.21e-06	-0.0526452	1	4.4e-05	1	0.109737	0.94	-0.149796	0.678066
Lrrc55	56.7855	89.34	50.457	41.8674	32.2891	36.1744	10.5396	24.7896	9.23106	11.6591	177.918	9.37717	14.1519	25.2333	20.1948	32.4682	5.65951	3.68605	7.42733	9.51955	28.3593	41.4198	4.68185	28.0368	15.9118	15.1997	11.2499	-1.58106	0.0028929	-0.127781	0.721086	-0.000825923	1	0.225259	0.340679	-0.0957308	0.798548
Lst1	787.073	363.652	363.125	316.818	147.095	480.316	201.306	112.507	304.625	409.623	780.863	270.063	133.326	54.2516	205.314	644.369	153.75	215.019	128.29	100.749	190.716	172.442	76.4703	68.1977	74.2552	82.6485	90.8028	-2.0766	0.000458087	-0.669882	0.107762	-0.0239468	0.440873	-0.152686	0.62331	-0.0568973	0.935341
Lum	186.204	169.872	158.815	104.356	200.91	399.928	279.299	544.418	8875.67	129.027	3820.3	54.3876	84.1668	459.246	140.522	114.263	126.396	58.9768	127.615	120.581	121.236	150.464	76.4703	177.314	163.665	21.8496	125.356	-0.124436	0.737378	-1.253	0.0220154	-0.00321776	1	-0.00523591	1	-0.0213554	1
Ly6a	14179.2	14929.8	7727.36	6358.23	7676.43	10100.7	7462.01	3111.09	2589.31	7239.53	3647.32	6280.83	8313.15	5111.01	6684.47	9110.45	6349.97	4946.68	3449.66	3723.73	4701.97	3079.44	5083.71	4137.33	2583.02	3994.68	2389	-1.15934	0.00432826	-0.214642	0.464353	-0.00304935	0.799745	-0.111656	0.946266	0.0190325	1
Ly6c2	2406.12	724.787	495.471	305.57	432.913	1133.46	643.968	167.806	170.775	990.246	1023.03	468.859	224.197	151.4	408.103	1444.21	319.762	377.206	233.623	215.776	297.772	93.8286	142.016	115.178	119.718	169.097	139.82	-1.65451	0.0113881	-0.367258	0.241137	-0.0581965	0.303986	-0.1211	0.719868	-0.0159911	1
Ly6e	41046.7	29951.6	21630.3	17372.5	26276.1	28587.8	20050.5	12343.3	5261.71	26802.7	10857.9	22306.4	19751.6	11387.8	19717.7	22860.1	19527.2	12993.3	11051.2	11247.3	14853.9	4009.27	9318.45	7932.91	5432.75	7301.57	7506.9	-1.38577	0.00352676	-0.517065	0.15452	-0.00658672	0.649467	-0.219516	0.430642	0.0166436	1
Ly6m	18.4883	10.0665	15.7161	17.4968	17.9384	9.0436	63.2374	45.7654	0	24.8728	0	24.3806	12.6623	23.9716	5.89014	18.7316	18.865	28.2597	27.6837	33.3184	65.9353	39.7292	38.2351	35.6144	19.7004	16.1497	34.5533	0.282892	0.315211	0.537602	0.153425	0.000204246	1	0.0188124	1	-1.37589	0.0118477
Ly86	718.403	296.961	471.483	501.784	144.703	503.427	196.036	184.015	392.32	232.405	706.73	237.555	155.671	54.2516	235.606	628.134	213.175	140.07	228.897	249.095	293.518	305.154	61.6444	135.638	47.7355	142.497	135.802	-2.10046	0.000127153	-0.733405	0.089911	-0.00458863	0.887161	-0.200751	0.439153	-0.108074	0.720379
Ly9	492.581	108.215	464.866	446.794	76.5371	238.148	116.989	235.501	193.852	146.905	598.002	138.782	95.3394	27.7566	180.07	429.579	173.558	235.907	322.076	249.888	326.841	263.735	7.80309	99.2656	42.4316	163.397	77.9458	-2.16948	0.000568431	-0.404347	0.223127	-0.00155787	1	-0.532233	0.068077	-0.12972	0.540164
Ly96	105.647	80.5318	68.6546	91.2335	32.2891	74.3585	57.9676	50.5326	92.3106	21.7637	69.1904	23.1304	25.3245	31.5416	40.3895	53.073	54.7086	46.6899	24.9828	26.1788	42.5389	63.3977	44.4776	33.3411	16.6695	47.4991	23.3034	-1.08539	0.0132493	-0.287398	0.336047	-0.000180642	1	-0.0358016	1	-0.0805887	0.911347
Maf	3211.68	2218.4	1816.45	1711.57	1426.7	2636.71	1322.72	1457.82	4597.07	1383.55	4828.5	808.937	974.249	957.604	1650.08	1820.09	1370.55	1167.25	1126.25	964.647	1134.37	1404.89	930.909	1055.55	616.015	1122.88	711.958	-1.22526	0.00150763	-1.20559	0.00328834	-0.000498117	1	-0.109934	0.962476	0.0128579	1
2021-03-01	15.8471	2.51662	1.65433	4.9991	11.9589	2.00969	20.0252	26.6965	212.314	10.1046	24.7108	5.00116	5.95871	11.355	9.25594	4.99511	7.54602	11.0581	6.75211	1.58659	9.92574	10.1436	9.36371	3.78876	34.8545	1.89997	13.6606	0.038366	0.963425	-0.195064	0.42106	-0.000102002	1	0.00362854	1	-0.00218247	1
2021-03-01	1183.25	479.416	680.755	587.394	222.436	800.861	356.237	263.151	696.945	355.991	1428.29	245.057	209.3	78.2233	307.97	723.666	313.16	190.446	208.64	205.464	280.048	455.618	139.675	184.892	100.017	545.29	240.266	-1.26761	0.0218651	-0.382875	0.240895	-0.000168848	1	-0.0151153	1	-0.0189822	1
Marcksl1	3034.72	2384.5	2533.6	1693.44	1008.14	1921.26	732.5	650.25	2603.16	1990.6	4680.23	1041.49	784.315	403.733	1069.48	2343.33	1456.38	798.644	494.255	472.011	930.184	1284.02	443.996	411.46	334.149	1021.23	417.05	-1.89674	0.000624429	-0.875811	0.0585683	-0.00120707	1	-0.136225	0.744666	-0.0156122	1
Marco	11.8853	15.0997	84.3707	63.7385	2.39178	1.00484	14.7554	39.0913	32.3087	10.8818	341.01	6.25145	10.4277	0	5.04869	6.24388	48.1059	1.22868	387.571	328.424	9.21676	322.906	0	1.51551	3.78853	274.545	1.60713	-0.367069	0.237594	-0.0869398	0.75123	0.00410625	1	-1.59917	0.0161675	-0.0697138	0.581196
Mcm6	487.299	588.889	306.878	316.818	251.137	541.611	199.198	229.78	166.159	467.141	607.887	403.843	275.59	182.942	328.165	786.105	292.408	136.384	122.888	150.726	400.575	570.579	133.433	107.601	106.079	219.446	155.892	-1.03277	0.0251781	-0.264061	0.374063	-0.0135337	0.485101	-0.0513553	1	-0.159429	0.555817
Mefv	237.707	288.153	458.248	323.067	123.177	192.93	173.903	90.5773	161.544	280.596	721.557	229.428	60.332	32.8033	128.742	234.77	349.947	153.585	54.6921	54.7374	190.007	230.768	60.8641	40.9186	49.2509	149.147	114.106	-1.09094	0.0272171	-0.208546	0.468319	-0.0003034	1	-0.163279	0.544498	-0.0542319	0.928133
Melk	114.892	60.3989	38.0495	42.4923	40.6603	97.4699	40.0504	44.8119	18.4621	67.6228	69.1904	56.8882	27.559	17.6633	39.5481	106.146	48.1059	45.4613	9.45296	13.486	90.0407	59.1712	11.7046	9.85078	6.81936	18.9997	26.5176	-1.08062	0.0289982	-0.289447	0.327538	-0.0223654	0.517595	-0.0896812	0.913937	-0.147771	0.430453
Milr1	401.46	168.614	226.643	214.336	80.1247	266.284	112.773	74.3688	129.235	131.359	395.373	121.278	74.4839	25.2333	130.425	282.848	65.0844	111.81	62.7947	73.7765	121.945	149.619	24.1896	52.2849	21.2158	151.997	49.0174	-1.9073	0.00178513	-0.475573	0.183516	-0.00120873	1	-0.0928817	0.924503	-0.0623011	0.894719
Mlkl	485.978	411.467	437.569	294.322	208.085	373.802	255.058	218.339	336.934	401.073	509.043	358.208	465.524	171.587	286.934	337.794	283.919	481.644	241.726	255.441	278.63	242.602	128.751	122.756	171.242	205.196	197.677	-1.18571	0.000748544	-0.401935	0.182096	-0.00118329	1	-0.428052	0.0614848	-0.0947239	0.914684
Mndal	2064.09	1036.85	1598.08	1199.16	517.821	1176.67	1089.79	472.909	1301.58	551.087	1873.08	765.177	899.021	348.22	479.626	1057.09	1245.09	1569.03	783.92	859.932	657.935	420.116	234.093	327.349	178.061	116.848	345.533	-2.49527	1.97e-07	-1.23453	0.0123625	-0.191486	0.0784817	-2.06746	7.38e-05	-0.170268	0.53122
Mrgpra2b	35.656	84.3068	70.3089	32.4941	27.5055	43.2083	35.8345	5.72067	13.8466	39.6409	4.94217	15.0035	3.72419	8.83166	17.6704	25.5999	69.8007	19.6589	2.70085	4.75977	9.21676	23.6685	11.7046	3.03101	2.27312	10.4498	8.83921	-1.24686	0.0272171	-0.190886	0.461433	-0.00171202	1	-0.123409	0.628816	-0.0210339	1
Ms4a14	129.418	81.7902	149.717	151.848	11.9589	84.4069	116.989	202.13	73.8485	64.5137	182.86	72.5168	34.2626	13.8783	34.4994	127.375	137.715	215.019	81.0254	73.7765	112.019	298.392	3.12124	44.7074	11.3656	166.247	13.6606	-1.17735	0.0272171	-0.178395	0.519532	-0.000393556	1	-0.770602	0.0409699	-0.228541	0.179684
Ms4a4b	67.3502	30.1994	14.0618	8.12353	14.3507	17.0824	13.7014	0	9.23106	20.2091	39.5373	8.75203	8.19323	5.04666	8.41449	21.8536	5.65951	2.45737	0.675211	8.72625	11.3437	3.38121	4.68185	3.78876	0	2.84995	9.64277	-1.54494	0.0238947	-0.144686	0.571177	-0.0362642	0.532608	0.0139201	1	-0.0417012	0.897053
Ms4a4c	4596.98	1253.28	972.744	494.911	337.241	1810.73	877.946	230.734	230.777	960.71	1803.89	482.612	304.639	70.6533	459.431	1723.94	389.563	497.617	118.162	124.547	336.766	84.5303	104.561	71.9865	25.0043	30.3995	138.213	-4.20429	1.17e-05	-0.742792	0.0717816	-3.53673	0.00340112	-0.182965	0.370084	-0.0783398	0.682833
Ms4a6b	2318.96	894.659	1105.09	867.968	355.18	1194.76	617.619	284.127	687.714	644.36	1798.95	484.487	363.481	78.2233	482.992	1223.18	360.322	477.958	194.461	182.458	549.461	518.171	82.7128	140.942	61.3742	457.892	220.177	-2.41369	0.000418035	-0.641001	0.111818	-0.00310586	1	-0.105041	0.822801	-0.068506	0.822537
Ms4a6c	4756.78	1697.46	1825.55	1727.81	615.884	2334.25	947.507	566.347	1223.12	1182.23	3662.15	762.051	615.982	138.783	1037.51	2957.1	602.738	678.233	357.862	333.977	974.141	1038.03	187.274	272.791	140.933	912.934	445.175	-2.34354	0.000560289	-0.536275	0.152051	-0.00434638	1	-0.0603453	1	-0.0601208	0.875515
Ms4a6d	3508.82	1478.51	1479.8	1259.77	464.006	1630.86	795.737	612.112	530.786	719.755	2199.26	427.599	413.386	128.69	681.574	1802.61	495.207	745.81	253.879	226.883	671.406	587.486	64.7657	186.407	65.9205	923.383	198.48	-2.56292	0.000355693	-0.521917	0.15452	-0.00241366	1	-0.114093	0.755055	-0.060537	0.853071
Ms4a7	2101.06	666.904	1644.4	1704.07	249.941	1164.61	513.277	921.029	530.786	607.828	1892.85	588.886	417.855	85.7933	631.928	1687.72	595.192	958.373	600.938	576.726	1027.31	1409.12	22.629	233.388	66.6782	1233.08	150.267	-2.52475	0.000409519	-0.503126	0.161476	-0.00109529	1	-0.375517	0.123559	-0.112169	0.555817
Mybpc2	51.5031	45.2992	71.136	48.1163	44.248	34.1647	262.435	1410.15	0	104.932	0	79.3934	74.4839	2320.2	78.2547	50.5754	163.183	63.8915	49.2904	47.5977	85.0778	101.436	33.5533	28.7946	91.6825	69.3487	38.5711	0.0297704	0.963425	0.102779	0.773041	-4.1042	0.00078263	-0.056046	1	-0.935174	0.0539211
Myh1	6.60296	5.03324	0	0.624887	1.19589	1.00484	867.406	9096.83	9.23106	0.777274	0	0.625145	2.97936	15220.7	0	1.87316	964.947	2.45737	1.35042	6.34636	0.708982	0.845303	1.56062	2.27326	4.54624	0.949983	3.21426	0.0453052	0.963425	0.0452413	0.951505	-2.88102	0.0269478	-0.0867384	0.61339	-1.37322	0.091872
Myh2	26.4119	8.80817	1.65433	1.24977	2.39178	2.00969	91.6942	2888.94	0	0	9.88434	0.625145	0.744839	1143.07	2.52435	0.624388	94.3252	0	0.675211	0.793296	2.12694	0	0.780309	0	0	0.949983	0.803564	-0.286558	0.286593	-0.0843284	0.640004	-8.87473	0.00133523	-0.0923618	0.544498	-0.0914881	0.427425
Myl2	7.92356	2.51662	0.827163	1.87466	0	0	0	45.7654	4.61553	3.10909	0	1.25029	0	841.531	2.52435	3.12194	0.943252	57.7481	17.5555	23.0056	0.708982	0	0.780309	0.757753	3.03083	0	0.803564	-0.0940247	0.803636	0.0392596	0.987709	-7.26163	0.00248088	-0.532012	0.0716033	-0.0428866	0.691991
Mylk2	9.24415	0	0.827163	3.74932	13.1548	9.0436	41.1043	342.287	0	4.66364	4.94217	2.50058	10.4277	389.855	1.6829	4.99511	28.2976	0	13.5042	16.6592	3.54491	3.38121	4.68185	2.27326	9.09248	0.949983	1.60713	0.0519775	0.963425	-0.069106	0.881378	-1.01874	0.047803	-0.115009	0.579341	-0.106006	0.397855
Mylpf	5.28237	21.3913	11.5803	6.87376	4.78357	13.063	219.223	1779.13	9.23106	6.21819	14.8265	13.128	11.1726	2614.17	14.3046	21.8536	300.897	19.6589	5.40169	8.72625	14.1796	9.29833	7.80309	9.09303	9.85018	15.1997	7.23208	0.00710936	0.992276	0.00795017	1	-5.74089	0.000119555	-0.140648	0.484001	-0.515033	0.107427
Myo1f	2884.18	1616.93	2054.67	2019.64	1035.64	2056.92	1287.94	881.937	1333.89	2063.66	4309.57	1781.04	700.893	389.855	1447.29	2520.03	1454.49	1739.81	1508.42	1412.86	2078.73	1625.52	331.631	510.725	841.054	1346.13	1011.69	-1.20978	0.0116332	-0.409263	0.214447	-0.000526248	1	-0.314967	0.1786	-0.0915334	0.84704
Myo3b	31.6942	26.4245	28.1236	54.3652	22.7219	16.0775	26.3489	61.0205	0	9.32728	4.94217	30.6321	27.559	17.6633	21.0362	13.1122	53.7654	121.64	127.615	119.788	60.9724	49.0276	16.3865	16.6706	20.4581	57.949	33.7497	-0.0722857	0.950137	0.0584895	1	0.000377192	1	-1.307	0.00474994	-0.148151	0.573556
Naip5	264.119	124.573	171.223	171.219	76.5371	136.659	138.068	153.505	69.233	153.123	276.761	196.921	75.2287	47.9433	111.071	160.468	101.871	116.725	197.162	169.765	241.054	194.42	39.7958	50.7694	75.0129	136.798	98.8384	-1.04672	0.0132062	-0.217154	0.461433	-0.000306507	1	-0.309576	0.197088	-0.255547	0.311305
Ncf1	2781.17	1418.12	2038.96	2036.51	660.132	1743.41	752.525	769.431	1500.05	1175.24	3009.78	1099	631.623	210.698	1253.76	1933.73	1036.63	823.217	914.236	812.335	1142.88	1615.37	247.358	431.161	450.835	2152.66	579.37	-1.3837	0.00985942	-0.437989	0.202276	-2.51e-05	1	-0.130924	0.785113	-0.0174824	1
Nckap1l	5138.43	2744.37	2841.31	2796.99	1325.05	3671.7	1760.11	1591.3	2769.32	1888	5673.61	1737.28	1002.55	572.796	1830.99	3492.83	1952.53	1768.07	1707.61	1570.73	2251.02	2437.01	376.109	919.154	793.319	2690.35	1100.88	-1.3986	0.00753603	-0.526529	0.158398	-0.000301853	1	-0.170692	0.599922	-0.0625369	0.947489
Neb	67.3502	50.3324	63.6916	58.7394	129.156	28.1356	2006.73	18280.4	13.8466	35.7546	19.7687	58.1385	37.2419	23820.2	37.0237	18.1073	1840.28	101.981	154.623	192.771	65.9353	58.3259	51.5004	39.4031	475.84	78.8486	78.7493	0.118762	0.740851	0.0885498	0.775158	-5.22543	0.00211209	-0.103204	0.646387	-0.578466	0.108875
Nfatc2	1234.75	804.06	668.348	692.375	469.985	983.743	357.291	436.678	1043.11	429.055	1962.04	388.215	298.68	383.546	408.103	646.242	407.485	403.008	298.443	293.519	489.197	465.762	163.865	220.506	361.426	468.342	315.801	-1.30892	0.00233168	-0.79362	0.0518199	-0.000403374	1	-0.0622855	1	-0.0121732	1
Nlrc4	231.104	111.99	93.4695	111.855	37.0726	131.635	62.1834	81.9963	170.775	83.9455	281.704	66.8905	29.7936	30.28	79.0962	152.975	89.609	57.7481	64.1451	60.2905	88.6227	89.6021	11.7046	20.4593	20.4581	94.9983	55.4459	-1.68453	0.00361065	-0.614755	0.125644	-0.00151867	1	-0.17361	0.536658	-0.0781175	0.837635
Nlrc5	1024.78	763.794	2282.97	1217.28	1029.66	575.776	1212.05	475.769	189.237	1406.09	864.879	1618.5	1351.14	325.51	635.294	697.442	1064.93	1779.13	1024.97	936.089	1220.87	560.436	127.19	156.097	343.241	532.94	327.854	-1.54024	0.00303162	-0.57892	0.134402	-0.000969208	1	-2.06392	0.000194447	-0.115468	0.724362
Nlrp3	443.719	408.951	1035.61	586.144	190.147	366.768	279.299	96.298	249.239	503.673	469.506	420.097	125.878	68.1299	202.789	362.77	778.183	255.566	285.614	271.307	294.936	346.574	61.6444	58.347	143.964	432.242	192.855	-1.15645	0.0262053	-0.262361	0.374063	2.69e-05	1	-0.436091	0.0915229	-0.0122623	1
Nmral1	241.669	134.639	128.21	86.2344	69.3617	104.504	72.723	59.1136	60.0019	104.155	187.802	98.7729	89.3807	44.1583	56.3771	162.341	84.8927	133.926	89.1279	63.4636	93.5856	89.6021	36.6745	34.8566	57.5857	45.5992	58.6602	-1.27044	0.00900268	-0.142291	0.677009	-0.00181914	1	-0.259218	0.289259	-0.113075	0.764122
Nod2	455.605	329.677	508.705	324.316	288.21	289.395	252.95	118.227	96.9261	411.178	232.282	335.703	214.514	122.382	182.594	226.653	261.281	213.791	220.794	253.061	270.831	180.05	95.1977	92.4458	161.391	225.146	180.802	-1.12267	0.00655368	-0.254338	0.380591	-6.45e-05	1	-0.260413	0.32007	-0.0137175	1
Ntpcr	414.666	251.662	424.335	377.432	137.528	327.579	112.773	142.063	692.33	328.787	919.243	268.187	257.714	97.1483	359.299	615.647	140.545	205.19	250.503	236.402	303.444	311.917	73.3491	103.812	146.237	338.194	119.731	-1.24039	0.00796125	-0.739591	0.0738956	-0.000880888	1	-0.15661	0.71474	-0.00871355	1
Nuf2	96.4033	115.765	38.0495	43.1172	28.7014	84.4069	22.1331	27.6499	9.23106	39.6409	64.2482	38.1338	26.8142	23.9716	55.5356	83.0436	45.2761	44.2326	14.8547	8.72625	75.1521	88.7568	5.46216	13.6395	8.33477	24.6996	20.8927	-1.33581	0.02094	-0.165205	0.574418	-0.00864861	0.746294	-0.0886836	0.937653	-0.138158	0.514571
Nxpe5	31.6942	57.8823	45.494	37.4932	62.1864	34.1647	27.4029	51.4861	373.858	46.6364	513.986	27.5064	43.2007	17.6633	38.7066	41.2096	57.5384	29.4884	20.2563	16.6592	80.1149	109.889	7.02278	18.9438	13.6387	46.5492	22.4998	-0.376849	0.245487	-1.20099	0.0245282	-0.000206568	1	-0.105529	0.840323	-0.0718742	0.827714
Oas1a	2149.93	1172.75	1875.18	1157.29	703.184	1285.2	972.802	484.35	433.86	1404.53	1497.48	1532.85	1550.75	172.848	1008.9	2056.11	862.132	1495.31	637.4	606.871	1086.87	334.74	81.1521	88.6571	148.51	226.096	268.391	-2.86608	1.01e-05	-1.33256	0.0159738	-0.625635	0.0389815	-1.98195	0.00236044	-0.119136	0.591432
Oas1g	653.694	398.884	1036.44	624.887	515.429	441.127	685.072	306.056	55.3864	680.892	489.275	842.695	907.959	123.643	445.968	663.725	698.007	1181.99	322.076	329.218	599.798	132.713	24.1896	43.1919	56.828	87.3984	116.517	-2.49944	0.00030033	-1.07779	0.0340345	-0.222486	0.114956	-2.86564	0.00016612	-0.121274	0.533253
Oas2	1912.22	1431.96	4765.29	2373.32	1979.2	996.806	2703.4	1037.35	92.3106	1573.2	677.077	3337.02	2272.5	688.869	1155.31	1374.28	3696.61	4782.03	1670.47	1639.74	2425.43	443.784	90.5159	86.3838	241.708	280.245	346.336	-2.71993	9.01e-05	-1.10215	0.0317875	-0.120859	0.182238	-3.62114	2.51e-06	-0.135749	0.461167
Oas3	6630.7	2950.74	4232.59	1965.89	2803.17	2913.04	1872.88	845.706	521.555	3261.44	3321.14	2518.08	2099.7	744.383	2410.75	3413.53	1546.93	1968.35	693.442	627.497	2226.91	398.983	301.199	81.8373	156.845	628.889	343.122	-2.98793	2.29e-05	-1.46207	0.0114038	-0.192981	0.124661	-0.515029	0.07414	-0.0530207	0.9175
Oasl1	2841.92	1835.87	2273.04	852.971	688.834	1539.42	780.982	318.451	373.858	1724.77	1467.82	1117.13	758.246	73.1766	687.464	1840.7	860.246	1084.93	428.084	398.234	667.152	183.431	49.1595	56.8315	48.4932	127.298	94.017	-4.48172	7.71e-08	-2.21212	0.0012033	-1.67115	0.0150676	-2.59512	0.000832304	-0.0943453	0.661154
Oasl2	9670.7	5881.34	8133.5	4661.66	4673.54	5945.66	6469.19	2850.8	1490.82	4826.87	2994.95	5920.12	6744.52	1566.99	3534.93	5301.68	6248.1	8595.86	2929.07	2876.49	3872.46	994.922	709.301	713.045	681.936	786.586	1204.54	-2.54529	4.67e-06	-1.38254	0.0106517	-0.441752	0.0430664	-2.2876	0.000129168	-0.123802	0.653137
Ogfr	1391.91	995.323	1568.3	1175.41	1010.53	1009.87	706.151	439.538	1486.2	1925.31	1907.68	1382.82	1542.56	403.733	1504.51	1908.13	672.539	857.621	1200.53	1212.95	1090.41	677.088	344.116	358.417	768.314	978.482	604.28	-1.04383	0.00482431	-0.886798	0.0230862	-0.00129466	1	-0.357885	0.126651	0.0693993	0.986181
Olfr56	254.874	142.189	142.272	60.614	52.6192	122.591	96.964	25.743	64.6174	87.0546	168.034	41.2596	84.1668	21.4483	38.7066	110.517	51.8789	54.062	37.1366	42.0447	30.4862	31.2762	26.5305	20.4593	20.4581	36.0993	29.7319	-1.98718	0.000602948	-0.388711	0.237081	-0.00272684	1	-0.138269	0.708922	-0.0169447	1
Osm	121.495	56.624	124.074	119.353	58.5987	84.4069	65.3453	32.4172	73.8485	72.2864	69.1904	64.3899	26.0694	27.7566	63.1087	111.141	362.209	60.2055	60.0938	51.5642	59.5545	54.0994	5.46216	9.09303	18.185	49.3991	51.4281	-1.00997	0.0361558	-0.421708	0.202248	-0.00205993	1	-1.1929	0.0174922	-0.0265442	1
P2ry10b	151.868	70.4654	56.2471	55.615	29.8973	114.552	94.8561	57.2067	152.313	33.4228	177.918	24.3806	11.9174	13.8783	26.9264	73.6778	39.6166	24.5737	20.2563	12.6927	32.6132	38.0386	20.288	27.2791	3.78853	25.6495	19.2855	-1.59482	0.00963794	-0.928831	0.0522307	-0.00197527	1	-0.0393964	1	-0.0776127	0.803966
P2ry13	299.775	211.396	168.741	100.607	72.9494	166.804	111.719	81.0429	36.9242	104.932	207.571	65.6402	56.6078	32.8033	92.5594	111.765	99.0415	70.0349	56.7178	53.1508	133.289	156.381	28.8714	65.9245	25.762	96.8982	60.2673	-1.30924	0.0128697	-0.144223	0.661771	-0.000266722	1	-0.0628894	1	-0.118263	0.691991
P2ry6	1545.09	971.415	781.669	761.112	623.06	1184.71	602.863	455.747	646.174	600.055	1314.62	536.374	338.157	369.668	537.686	994.026	572.554	368.605	332.879	361.743	629.576	627.215	299.639	453.136	230.343	635.539	368.033	-1.05649	0.0127099	-0.35333	0.249311	-0.000452844	1	0.00135711	1	-0.0562967	0.99803
Parp10	953.468	863.201	1660.12	1021.69	1432.68	684.299	1014.96	460.514	498.477	2214.45	953.839	1632.25	1573.84	634.618	1075.37	861.031	1131.9	1180.76	1469.94	1465.22	1018.1	579.878	332.412	357.659	953.952	627.939	578.566	-0.686009	0.0224666	-0.599267	0.0627722	-0.000628553	1	-1.34988	3.57e-05	0.0409503	1
Parp11	1139.67	690.812	991.769	604.266	517.821	643.1	533.302	338.473	498.477	548.755	504.101	672.656	607.044	305.323	414.834	712.427	538.597	688.062	476.699	465.665	552.297	296.701	259.063	262.182	262.924	274.545	359.997	-1.44199	7.1e-05	-0.438487	0.162268	-0.00209959	0.882978	-0.413485	0.0735515	-0.0755103	0.969106
Parp12	4746.21	3248.96	2931.47	1945.27	2028.23	3131.1	2430.42	1398.7	932.337	2287.52	1966.98	2299.91	2351.46	1247.79	1924.39	2752.93	2267.58	2091.22	1819.69	1796.02	1737.01	1020.28	1182.95	1179.06	960.772	916.733	1234.28	-1.24766	0.0020934	-0.271224	0.349701	-0.00312282	0.782562	-0.308664	0.204474	-0.0436834	1
Parp14	7667.36	6541.95	12217.2	7181.2	4740.51	5519.61	6008.61	3563.03	1896.98	6203.42	4759.31	7301.07	7929.56	2464.03	4569.91	5488.37	6416.94	6430.93	5284.2	5344.43	5310.98	3225.68	2260.56	2416.47	1927.6	3197.64	2536.05	-1.45425	9.47e-05	-0.353492	0.23276	-0.000989139	1	-0.805775	0.00495638	-0.103822	0.870703
Parp9	3231.49	2496.49	2291.24	1632.83	1131.31	2346.31	1498.73	1003.98	1089.27	1399.87	1917.56	1395.95	1710.15	664.898	1236.93	2120.42	1459.21	1285.2	1095.87	1116.17	1272.62	873.198	759.241	726.685	431.893	775.186	725.619	-1.61008	6.81e-05	-0.491455	0.150658	-0.00332332	0.781294	-0.280979	0.263198	-0.0838014	0.918208
Pbk	145.265	114.506	28.9507	36.8683	50.2274	116.562	23.187	28.6034	4.61553	32.6455	29.653	53.1373	29.7936	16.4017	45.4382	118.009	48.1059	27.031	9.45296	6.34636	69.4802	67.6242	10.9243	12.8818	9.85018	16.1497	6.42852	-1.44408	0.0190022	-0.320815	0.281022	-0.0288399	0.450785	-0.0738635	0.989743	-0.100147	0.662661
Pcdh15	40.9384	22.6496	114.149	62.4887	8.37124	7.03391	10.5396	54.3464	46.1553	3.88637	14.8265	1.87543	78.9529	23.9716	14.3046	13.1122	3.77301	13.5155	0	2.37989	112.019	151.309	0	6.81977	18.185	0	8.03564	-2.73083	0.00392494	-0.186458	0.43252	-0.0532336	0.450785	-0.00939563	1	-3.63023	0.0185254
Pclaf	192.807	210.138	54.5928	59.3643	82.5165	176.853	44.2662	42.9051	32.3087	90.941	123.554	51.887	23.8348	21.4483	88.3521	196.682	69.8007	33.1744	7.42733	11.8994	66.6443	103.127	14.0456	12.8818	5.30394	37.0493	10.4463	-2.01705	0.00324794	-0.692164	0.0959057	-0.060868	0.297482	-0.0843741	0.921395	-0.0871501	0.711223
Pf4	192.807	173.647	162.951	147.473	153.074	234.129	65.3453	81.0429	410.782	220.746	904.417	118.777	125.878	78.2233	185.96	147.356	120.736	108.124	56.7178	85.6759	114.855	212.171	39.0155	28.7946	103.806	124.448	81.9636	-0.818652	0.0323507	-1.17749	0.0159738	-0.000377652	1	-0.113095	0.90066	0.0170227	1
Phf11a	555.97	220.204	112.494	64.3634	55.011	215.037	96.964	35.2775	55.3864	114.259	222.398	59.3887	52.8836	13.8783	39.5481	239.765	60.3681	108.124	31.7349	26.9721	46.7928	23.6685	13.2653	12.8818	9.09248	11.3998	31.339	-3.22549	0.000127127	-0.434434	0.183516	-0.338473	0.0974845	-0.185636	0.372165	-0.0692186	0.769984
Phf11b	2344.05	972.674	591.422	324.941	266.684	1030.97	349.914	145.877	346.165	529.323	854.995	295.693	360.502	83.2699	293.666	1226.3	261.281	508.675	177.581	175.318	226.165	107.353	86.6143	71.2288	33.3391	35.1494	76.3386	-3.7302	3.7e-06	-1.1098	0.0309164	-2.69953	0.00512735	-0.446885	0.0951614	-0.0742791	0.782841
Phf11d	3547.11	1965.48	2069.56	1338.51	1088.26	1978.54	1506.1	769.431	567.71	1046.99	1126.81	1167.15	1564.91	484.48	760.67	1732.05	1413.93	2064.19	702.22	783.776	932.311	468.298	475.208	453.894	211.4	247.946	448.389	-2.20103	1.17e-05	-0.578546	0.134195	-0.081493	0.161322	-0.71992	0.0249869	-0.123082	0.692091
Pi16	859.706	997.84	615.41	375.557	1006.94	1032.98	753.579	530.116	3955.51	1234.31	3469.4	662.028	385.827	710.318	1454.02	743.022	401.825	379.663	627.271	626.704	430.352	229.922	344.116	335.684	1162.32	475.941	557.674	-0.200401	0.484469	-1.20401	0.0110442	-0.000704893	1	-0.0082662	1	0.234732	0.344317
Pik3ap1	6143.4	2846.3	5120.97	4356.71	1346.57	3847.55	1696.87	1299.55	2926.25	2997.17	6978.34	2041.1	1290.81	434.013	1889.89	4157.18	2293.05	1865.14	1621.18	1538.2	2536.74	2599.31	499.398	691.828	515.24	1829.67	910.439	-2.18319	3.78e-05	-0.969381	0.0434246	-0.00115479	1	-0.295512	0.199223	-0.0839268	0.8382
Pik3cd	1438.13	880.817	1253.15	1067.31	675.679	904.36	717.745	352.775	886.182	1228.87	2194.32	1005.23	475.207	322.986	819.571	1181.97	695.177	756.869	704.246	674.301	911.75	715.972	287.154	327.349	459.928	754.286	506.246	-1.18263	0.00300879	-0.474874	0.153629	-0.000479451	1	-0.264281	0.315706	-0.0380285	1
Pik3cg	1744.5	898.433	962.818	1092.3	418.562	1414.82	511.169	448.119	923.106	603.942	1853.31	403.843	309.108	214.483	525.905	951.568	495.207	262.938	408.503	355.396	643.755	884.187	240.335	344.02	209.885	674.488	393.747	-1.50028	0.00228717	-0.590293	0.125207	-0.000167253	1	-0.0149491	1	-0.0564236	0.985073
Pik3r5	1691.68	889.625	2077.83	2108.37	663.72	996.806	557.543	720.805	683.099	873.655	2920.82	845.196	499.042	215.745	1023.2	1271.25	884.77	765.469	1016.19	876.592	1092.54	1404.05	128.751	316.741	438.712	2546.9	427.496	-1.12947	0.0225457	-0.332059	0.282886	0.000146167	1	-0.215963	0.409732	-0.0179564	1
Pip4k2a	3042.65	1941.57	1229.99	1296.64	913.661	2443.78	956.993	815.196	1943.14	997.242	2896.11	831.442	716.535	764.569	1162.04	2000.54	851.757	792.5	769.066	801.229	896.862	1007.6	1019.86	809.28	475.082	663.088	797.136	-1.09189	0.0088106	-0.385376	0.218869	-0.0011995	1	0.00329683	1	-0.00948015	1
Pira2	130.739	71.7237	116.63	100.607	31.0932	82.3972	36.8885	45.7654	32.3087	101.823	296.53	71.2665	17.1313	10.0933	62.2672	99.2777	22.6381	8.60078	25.658	30.9385	64.5173	71.8507	20.288	19.7016	29.5505	90.2484	44.196	-1.07571	0.0269953	-0.187556	0.527074	-5.58e-05	1	0.135306	0.745993	-0.0252163	1
Pkib	282.607	110.731	112.494	104.356	56.2069	217.046	108.558	110.6	272.316	59.8501	316.299	41.2596	34.2626	15.14	53.8527	146.731	123.566	108.124	89.1279	65.8435	95.0035	107.353	39.0155	56.8315	23.4889	70.2987	74.7315	-1.05838	0.0272171	-0.501386	0.171774	-0.000244849	1	-0.151079	0.636886	-0.0714929	0.86026
Pla2g2d	56.7855	33.9744	247.322	213.711	32.2891	25.1211	11.5935	16.2086	143.081	6.21819	153.207	1.25029	135.561	29.0183	56.3771	96.1558	13.2055	7.3721	5.40169	13.486	319.751	660.182	0	4.54652	14.3964	9.49983	25.7141	-3.84007	7.71e-08	-1.66559	0.00477483	-1.45514	0.0146482	-0.0800375	0.967743	-4.8485	0.000536609
Pla2g4c	85.8385	39.0076	37.2223	20.6213	29.8973	26.126	23.187	18.1155	83.0796	18.6546	148.265	26.2561	23.8348	12.6167	11.7803	13.1122	26.4111	34.4031	10.8034	9.51955	17.7245	16.9061	4.68185	6.81977	9.85018	19.9496	14.4642	-1.36879	0.0183315	-0.51314	0.164377	-5.91e-05	1	-0.128196	0.738617	-0.0116907	1
Plac8	4550.76	2267.47	1536.87	1087.3	1463.77	2863.81	1831.78	585.416	2843.17	2826.17	5461.1	1792.29	1311.66	502.143	1353.89	3070.74	1093.23	1543.23	628.622	524.368	980.522	573.961	599.277	442.528	366.73	238.446	524.728	-1.92514	0.00105816	-1.16057	0.0259346	-0.246151	0.0881189	-0.20028	0.417555	-0.0429339	0.99594
Pld4	2815.5	1141.29	1478.14	1415.99	892.135	1785.61	1226.81	694.108	1029.26	1554.55	2668.77	1533.48	593.637	310.37	1075.37	1925.61	930.047	1189.36	636.049	594.972	1418.67	912.082	280.911	475.869	403.857	615.589	652.494	-1.44706	0.00577084	-0.491958	0.173582	-0.00251171	1	-0.177352	0.570189	-0.0959361	0.801223
Plek	4809.6	2949.48	2708.13	2158.98	1011.72	3737.02	1346.96	1530.28	3526.27	1749.64	7067.3	976.476	895.296	386.07	1589.5	4225.23	1779.92	922.741	1002.69	988.446	1456.96	2376.99	403.42	656.214	432.65	2067.16	850.975	-1.66381	0.00491953	-0.680411	0.104685	-0.000970783	1	-0.105754	0.870022	-0.0526074	0.959274
Plekha4	612.755	728.562	406.964	229.334	646.977	550.655	403.665	137.296	604.635	711.205	746.267	452.605	640.562	301.538	440.078	384.623	264.111	398.093	226.871	210.223	171.574	94.6739	80.3718	91.6881	360.668	134.898	134.195	-1.40783	0.00366029	-1.44367	0.00348755	-0.00925538	0.573189	-0.298701	0.205895	0.128756	0.698446
Pml	2658.35	1889.98	2479.01	1537.85	1478.12	1580.62	1276.34	819.963	1920.06	1723.22	2095.48	1745.4	1516.49	856.671	1089.68	1446.71	1379.03	1464.59	1216.73	1179.63	1276.17	753.165	672.626	747.902	749.372	577.59	836.511	-1.51182	1.48e-07	-0.905485	0.00477483	-0.00229253	0.723871	-0.515817	0.0157494	-0.0337057	1
Pnp	1645.46	1238.18	941.312	772.36	550.11	1191.75	504.845	418.563	996.955	804.478	1680.34	680.783	818.578	422.658	796.011	1279.37	454.648	477.958	386.896	419.653	544.498	540.994	505.64	457.683	385.673	529.14	466.871	-1.09019	0.00582106	-0.284633	0.327107	-0.000980763	1	0.0588492	1	0.040566	1
Pou2f2	1603.2	537.298	1195.25	1285.39	420.954	985.752	459.525	427.144	761.563	774.164	1571.61	629.521	219.728	133.737	575.551	918.475	489.548	390.721	564.477	502.156	518.266	714.281	131.872	172.768	241.708	586.139	274.819	-1.9587	2.71e-05	-1.20045	0.0138559	-0.000390257	1	-0.279445	0.241113	-0.0499509	1
Ppfia4	1044.59	432.859	445.841	468.665	251.137	690.328	270.867	127.762	683.099	603.942	914.301	441.977	283.039	117.335	430.822	811.705	221.664	273.996	426.058	381.575	440.278	273.033	85.834	118.967	212.915	226.096	212.945	-1.64292	0.00276619	-0.838876	0.0649281	-0.00239208	1	-0.208935	0.414841	-0.0162716	1
Prex1	3580.13	2454.96	2809.05	3040.08	2097.59	2542.26	1596.74	1272.85	2076.99	3398.24	4541.85	2206.14	1809.21	1532.92	2649.72	3181.88	2095.91	1796.33	2451.02	2446.52	2159.56	2241.74	1072.14	1020.69	1611.64	1709.02	1235.08	-1.12303	9.53e-06	-0.649321	0.0165039	-0.00407455	0.474925	-0.478225	0.0169338	-0.0370085	1
Prkcb	2136.72	1205.46	1552.59	1779.68	577.616	1689.14	524.87	503.419	1241.58	776.496	1907.68	510.118	326.239	214.483	854.912	1650.26	611.227	481.644	650.229	575.933	731.669	1068.46	156.842	215.96	302.325	658.338	352.765	-2.24049	3.7e-06	-1.45821	0.00348755	-0.0019275	1	-0.253549	0.302787	-0.0639948	0.959551
Prnd	126.777	167.355	117.457	226.834	92.0837	54.2616	66.3993	119.181	32.3087	104.932	202.629	60.639	59.5871	71.9149	33.658	76.1754	137.715	88.4652	118.837	126.134	132.58	204.563	57.7429	105.328	48.4932	24.6996	77.9458	-1.05557	0.014162	0.0515025	1	-5.85e-05	1	-0.252769	0.331764	-0.439954	0.0980518
Prol1	2.64119	5.03324	0	0	0	0	0	27814.9	0	0	0	0	0	0	0	0	0	0	0	0	0	0	0	0	0	0	0	-6.36064	0.0287079	-0.0617791	0.606999	0	1	0	1	0	1
Psmb8	1636.21	1114.86	1710.57	1287.89	679.266	1237.97	684.018	448.119	1264.66	1909.76	2322.82	1790.41	1573.84	375.976	1445.61	3052.01	599.908	1011.21	829.835	847.24	1361.95	812.336	284.033	295.524	597.83	727.687	629.191	-1.37174	0.00451858	-0.523519	0.153425	-0.0233999	0.335661	-0.239269	0.353506	-0.0620462	0.967945
Ptpn6	2948.88	1532.62	2101.82	1898.41	823.969	1876.04	1023.39	740.827	1440.05	1671.92	4724.71	1309.05	688.976	283.875	1099.77	2712.34	1039.46	979.26	731.929	683.028	1397.4	1531.69	329.29	448.59	495.54	1173.23	658.119	-1.5371	0.00366029	-0.457485	0.190851	-0.000957613	1	-0.137382	0.763954	-0.0776314	0.876451
Ptpn7	311.66	221.463	94.2966	96.2326	94.4754	297.434	91.6942	98.2049	198.468	135.246	395.373	111.901	54.3732	41.635	128.742	262.243	66.9709	81.0931	45.2392	69.0167	109.183	146.237	26.5305	80.3218	44.7047	96.8982	62.678	-1.06075	0.0272171	-0.443532	0.199514	-0.00198865	1	0.00194626	1	-0.0629805	0.925818
Ptprc	5010.33	2534.24	5811.65	4989.72	1870.37	3374.27	3972.36	2032.75	1610.82	2666.83	4942.17	2687.5	929.559	1021.95	1838.57	2786.02	3306.1	1941.32	1945.28	1834.89	3039.4	3633.96	1125.99	1420.03	1075.19	2288.51	2240.34	-1.11793	0.0116664	-0.188795	0.531308	-0.000117763	1	-0.158392	0.720261	-0.146367	0.669544
Pvalb	7.92356	2.51662	4.96298	3.74932	4.78357	2.00969	25.295	1304.31	0	2.33182	4.94217	0.625145	15.6416	203.128	12.6217	27.4731	16.9785	0	0	0.793296	8.50778	17.7514	0	0.757753	0.757706	0.949983	1.60713	-0.199378	0.469366	-0.132462	0.489434	-7.94152	7.78e-05	-0.0667884	0.825938	-6.67411	0.0118477
Rab39	36.9766	31.4578	38.0495	28.7448	13.1548	39.1889	9.48561	12.3948	83.0796	7.77274	153.207	7.50174	13.4071	2.52333	20.1948	55.5705	18.865	19.6589	16.2051	22.2123	26.2323	27.895	5.46216	12.8818	5.30394	19.9496	15.2677	-1.11481	0.0272171	-0.417404	0.212894	-0.00079511	1	-0.117758	0.782097	-0.0353635	1
Rab3il1	1298.14	1016.71	851.978	790.482	560.873	1147.53	406.827	502.466	2713.93	772.61	3380.44	481.987	531.815	357.051	905.399	1241.91	442.385	453.384	526.665	483.117	825.964	789.513	259.843	288.704	381.884	660.238	306.962	-1.32742	0.00341399	-1.34005	0.00429839	-0.00100124	1	-0.0970089	0.991249	-0.0124608	1
Rac2	2567.23	1405.53	1873.52	1914.03	631.431	1827.81	595.486	512.954	1915.45	1291.83	3533.65	888.331	350.074	203.128	938.215	1822.59	773.467	446.012	458.469	468.044	869.212	1304.3	304.321	254.605	291.717	1127.63	398.568	-1.87891	0.000632221	-1.0005	0.040142	-0.000380976	1	-0.0842441	0.999592	-0.0208963	1
Racgap1	264.119	222.721	145.581	130.601	104.043	273.318	94.8561	76.2757	115.388	191.987	202.629	196.295	119.174	65.6066	196.058	316.565	106.587	133.926	65.4955	74.5698	238.218	244.293	42.1367	51.5272	39.4007	95.9483	98.8384	-1.15161	0.0199513	-0.350819	0.265256	-0.0113586	0.54731	-0.104176	0.926997	-0.147948	0.585144
Radx	85.8385	40.2659	100.087	106.856	7.17535	48.2325	28.4568	29.5568	18.4621	6.99546	14.8265	12.5029	15.6416	1.26167	26.9264	29.9706	23.5813	2.45737	14.1794	11.1061	10.6347	73.5414	3.90155	13.6395	1.51541	72.1987	9.64277	-1.10084	0.0325618	-0.14615	0.577648	0.000372554	1	-0.0227872	1	-0.0227523	1
Rasal3	129.418	104.44	150.544	131.226	70.5576	132.639	102.234	68.6481	207.699	181.105	256.993	159.412	87.1462	25.2333	120.327	164.838	106.587	190.446	172.854	160.246	170.865	126.795	16.3865	39.4031	80.3169	98.7982	62.678	-1.01182	0.0210987	-0.941574	0.0351384	-0.000544309	1	-1.23603	0.00275715	-0.115132	0.783356
Rasgrp1	442.399	211.396	187.766	210.587	72.9494	260.255	79.0468	92.4842	110.773	158.564	375.605	80.0185	45.4352	29.0183	68.9988	190.438	60.3681	46.6899	33.0854	24.5922	73.0251	125.95	21.8487	55.3159	18.185	50.3491	40.1782	-2.54165	7.39e-06	-0.761221	0.0839531	-0.00316198	1	-0.0152745	1	-0.0999304	0.756412
Rassf4	3420.34	1278.44	2324.33	2667.64	883.764	2104.14	1249.99	1253.78	1786.21	1051.65	4210.73	1055.87	332.198	365.883	876.79	1466.06	1213.02	861.307	1072.24	1034.46	1059.93	1676.24	417.465	717.592	492.509	1378.43	1008.47	-1.53966	0.000585814	-0.492394	0.160373	8.33e-06	1	-0.132321	0.840244	-0.078658	0.918208
Rgs10	912.53	520.94	398.693	415.55	271.467	792.822	244.518	243.129	821.564	322.569	1107.05	282.565	287.508	186.727	424.09	799.841	206.572	492.702	320.05	287.173	406.246	407.436	132.653	178.072	162.907	329.644	182.409	-1.30257	0.0088106	-0.738125	0.0813648	-0.00180895	1	-0.158684	0.681394	-0.0434944	1
Rgs18	203.371	75.4986	52.1113	48.7412	21.526	115.557	74.8309	23.8361	87.6951	32.6455	123.554	21.2549	20.1107	12.6167	28.6093	68.0583	48.1059	28.2597	28.3589	35.6983	22.6874	24.5138	30.4321	27.2791	9.09248	16.1497	37.7675	-1.34176	0.0222022	-0.269248	0.358154	-0.00147292	1	-0.0724291	1	-0.0252495	1
Rhoh	85.8385	71.7237	71.9632	46.2416	29.8973	66.3197	37.9424	17.162	143.081	61.4046	187.802	48.1361	37.9868	21.4483	44.5968	83.668	61.3114	29.4884	30.3845	28.5586	64.5173	52.4088	5.46216	14.3973	21.9735	15.1997	35.3568	-1.72535	0.00307429	-0.81404	0.071675	-0.0185067	0.49393	-0.264252	0.240414	-0.0943159	0.76924
Rnf180	316.942	157.289	247.322	248.08	87.3001	235.134	118.043	154.458	156.928	110.373	153.207	104.399	81.1874	47.9433	125.376	186.692	154.693	187.988	108.709	142	152.431	206.254	19.5077	82.595	59.1011	170.047	90.8028	-1.39411	0.00595826	-0.342269	0.271421	-0.000241684	1	-0.245213	0.317132	-0.100557	0.798548
Rnf213	25892.9	20947.1	40971.9	22764.6	19082.8	14877.7	22346	10205.7	3664.73	20248	12009.5	26804.3	23292.6	8525.08	10970.8	11625.5	21928.7	23541.6	18179.4	17723	17761.4	7610.26	5085.27	5844.55	7755.88	6132.14	8811.89	-1.64122	0.00011379	-0.375003	0.230064	-0.000811938	1	-1.3577	0.00108603	-0.104979	0.826352
Rptn	15.8471	12.5831	28.1236	15.6222	19.1343	4.01938	26.3489	272.685	0	13.9909	0	19.3795	17.1313	657.328	13.4632	4.37072	21.6948	4.91473	4.72648	5.55307	25.5233	29.5856	11.7046	21.2171	9.85018	1.89997	19.2855	-0.0777962	0.918415	0.0752467	0.874647	-1.78825	0.0216639	0.0521136	1	-0.495163	0.107192
Rtp4	3512.78	2356.81	1765.17	1343.51	1138.49	2703.03	1429.17	881.937	687.714	1053.21	1443.11	1147.14	1232.71	492.05	1130.91	2239.68	1509.2	1333.12	702.22	706.033	1021.64	360.099	351.919	374.33	120.475	253.645	314.194	-2.56072	2.97e-06	-1.39943	0.00943182	-0.954052	0.0182274	-0.837147	0.0205078	-0.112129	0.715633
Runx3	1398.51	848.101	244.013	189.966	332.458	1037	228.709	112.507	309.241	443.046	602.945	273.813	210.045	80.7466	330.689	774.241	263.167	218.706	103.983	134.86	253.815	144.547	37.4548	80.3218	81.8323	292.595	205.713	-1.01207	0.0377432	-0.298794	0.300146	-0.0016684	1	-0.023366	1	0.00723455	1
Ryr1	112.25	23.9079	18.1976	18.1217	13.1548	24.1163	509.061	4658.54	27.6932	27.2046	14.8265	24.3806	23.8348	6110.25	31.9751	32.4682	311.273	9.82946	14.8547	11.1061	20.5605	19.442	10.144	10.6085	15.9118	7.59986	23.3034	-0.109543	0.788254	-0.0689431	0.91311	-6.75649	5.79e-07	-0.0964566	0.749222	-2.43571	0.0300042
Saa4	11.8853	54.1073	29.7779	16.872	11.9589	14.0678	10.5396	3.81378	0	22.5409	0	24.3806	53.6284	0	19.3533	39.9608	10.3758	14.7442	2.02563	0.793296	7.7988	17.7514	2.34093	0.757753	1.51541	8.54985	0	-1.32343	0.0272171	-0.204866	0.369078	-0.00839602	1	-0.125666	0.530134	-0.0346492	0.946585
Samd3	23.7707	16.358	19.8519	19.9964	3.58767	17.0824	9.48561	8.58101	0	7.77274	0	13.7532	17.8761	3.785	5.04869	12.4878	13.2055	17.2016	6.75211	7.93296	18.4335	10.1436	3.12124	8.33528	0.757706	4.74991	1.60713	-1.61421	0.0124949	-0.0966548	0.809104	-0.00151025	1	-0.260068	0.226319	-0.138882	0.438654
Samd9l	3976.31	2571.99	3450.1	2657.02	1097.83	2669.87	2276.55	1762.92	1241.58	1027.56	2421.66	1149.64	1088.21	907.138	858.278	2200.97	2131.75	1105.81	1424.7	1498.54	1289.64	1489.42	1466.98	1449.58	429.62	664.038	1178.03	-1.4526	0.00152983	-0.138492	0.694878	-0.000621493	1	-0.158619	0.71474	-0.138939	0.685194
Samsn1	574.458	489.483	394.557	341.188	144.703	529.553	172.849	120.134	290.778	281.373	449.737	155.036	141.519	47.9433	223.825	638.749	280.146	121.64	95.2048	97.5754	196.388	225.696	92.8568	75.0175	57.5857	260.295	121.338	-1.24708	0.0251781	-0.334109	0.277136	-0.00103415	1	-0.0596767	1	-0.0138636	1
Sap30	459.566	229.012	233.26	183.717	138.723	274.323	89.5863	90.5773	221.545	345.109	355.836	209.423	192.168	73.1766	318.068	507.003	102.814	158.5	139.769	157.866	146.759	138.63	57.7429	69.7132	98.5018	183.347	89.9992	-1.25035	0.0130616	-0.39334	0.230064	-0.00358696	0.919624	-0.125154	0.833975	0.0340524	1
Sash3	863.668	372.46	287.853	316.193	171.013	565.727	211.845	121.088	549.248	351.328	1067.51	264.436	128.857	61.8216	250.752	605.656	198.083	142.527	174.205	176.905	318.333	229.077	90.5159	138.669	121.991	187.147	178.391	-1.17302	0.0251781	-0.417474	0.216979	-0.000909769	1	-0.0412515	1	-0.024116	1
Scgb2b26	2.64119	1.25831	0	0	0	0	0	5308.79	0	0	0	0	0	0	0	0	0	0	0	0	0	0	0	0	0	0	0	-5.57301	0.0327054	-0.0501332	0.683733	0	1	0	1	0	1
Scimp	287.889	114.506	59.5558	34.3688	51.4233	155.751	52.6978	17.162	36.9242	120.477	232.282	76.8928	59.5871	3.785	62.2672	140.487	31.1273	38.0892	9.45296	10.3128	50.3377	10.9889	9.36371	9.85078	9.09248	9.49983	16.0713	-2.09056	0.00594071	-0.477945	0.155653	-0.101558	0.249424	-0.0647463	0.988729	-0.0311517	0.995776
Serpinf1	552.008	580.081	420.199	339.939	734.277	872.205	535.41	778.965	19865.2	665.346	8994.75	450.729	469.993	874.334	734.585	404.604	365.039	420.21	422.007	448.212	509.049	390.53	425.268	365.995	608.438	195.696	458.032	-0.0936001	0.864467	-1.36451	0.0145167	-0.000694082	1	-0.00932443	1	0.0395947	0.997122
Sfi1	328.828	538.557	1009.97	857.97	1097.83	193.935	941.183	853.334	152.313	1127.82	301.472	1433.46	1874.76	577.843	817.047	296.584	2733.54	2574.09	2729.88	2462.39	1073.4	929.833	356.601	372.814	1304.01	1014.58	1033.38	0.0646377	0.963425	0.0338196	1	0.000256014	1	-1.06234	0.0135472	-0.0233552	1
Sfrp1	1121.18	1351.43	1234.13	1132.92	906.486	1254.05	1127.73	1089.79	8141.8	850.337	4764.25	885.205	958.608	676.253	837.242	878.514	690.461	552.907	355.161	338.737	933.02	1116.65	407.321	848.683	528.121	657.388	553.656	-0.492225	0.131718	-1.09624	0.0259346	-0.000277479	1	0.0623063	1	-0.0333405	1
Sfrp4	72.6326	66.6904	55.4199	31.2444	45.4439	173.838	116.989	137.296	203.083	47.4137	345.952	17.5041	20.8555	69.3916	39.5481	43.7072	40.5598	29.4884	26.3332	21.419	29.7772	32.1215	14.8259	20.4593	53.0394	1.89997	28.9283	-0.692403	0.0744256	-1.67123	0.00306531	-0.0294276	0.385134	-0.119966	0.805098	-0.0837505	0.807858
Sgk3	1480.38	992.807	794.904	767.361	496.295	1046.04	686.126	533.93	576.941	443.823	1082.33	366.96	318.791	434.013	433.346	897.246	511.243	394.407	345.708	423.62	468.637	557.9	465.845	437.223	319.752	426.542	453.21	-1.09476	0.00213486	-0.202606	0.487288	-0.000695814	1	0.0287653	1	-0.095881	0.908162
Sh2d1b1	283.927	143.447	60.3829	78.7358	45.4439	231.114	76.9388	68.6481	23.0777	56.741	49.4217	55.0127	36.4971	13.8783	95.9252	180.448	29.2408	31.9458	45.2392	42.0447	47.5018	54.9447	39.7958	31.0679	16.6695	33.2494	32.1426	-1.26948	0.0251781	-0.264897	0.36062	-0.00454907	1	-0.0217132	1	-0.0372191	0.997122
Sh3bp2	1255.88	650.546	996.732	829.85	458.026	808.9	575.46	499.606	586.172	820.024	1364.04	713.29	451.372	176.633	569.661	925.343	585.76	837.962	557.049	572.759	754.356	623.834	134.213	237.934	289.444	877.784	304.551	-1.14196	0.0173713	-0.418065	0.210025	-0.000208368	1	-0.290776	0.218473	-0.0664854	0.947389
Shisa3	254.874	385.043	75.2719	53.1154	101.651	255.23	37.9424	54.3464	9.23106	73.0637	9.88434	28.1315	77.4633	40.3733	127.9	158.595	33.0138	45.4613	10.8034	11.1061	72.3161	83.685	21.0683	12.124	15.9118	22.7996	10.4463	-2.34704	0.000176348	-0.706158	0.0980061	-0.132178	0.151559	-0.0246232	1	-0.0774574	0.810891
Siglec1	5597.99	2020.85	7183.91	4116.13	2388.2	2887.92	2550.58	1618	895.413	2934.98	3538.59	2398.68	2152.58	428.966	1993.39	1989.3	2822.21	1874.97	1019.57	970.994	3313.07	1339.81	28.0911	379.634	268.986	1782.17	403.389	-2.26539	0.00139017	-1.0045	0.0409023	-0.000910832	1	-0.412391	0.108688	-0.0521467	0.90068
Siglece	548.046	270.537	1028.16	1044.81	191.343	365.763	182.335	217.386	244.623	373.091	523.87	352.582	137.795	63.0833	305.446	311.57	279.203	114.267	180.957	162.626	263.741	499.574	63.205	90.9303	97.7441	690.638	150.267	-1.48236	0.00648025	-0.401072	0.227355	0.000286622	1	-0.0857338	0.99612	-0.00216111	1
Sirpb1a	445.04	145.964	168.741	132.476	84.9083	274.323	187.604	70.555	193.852	150.014	518.928	178.166	44.6903	41.635	108.547	345.287	72.6304	84.7791	44.564	39.6648	126.908	58.3259	44.4776	60.6202	43.947	38.9493	81.9636	-1.36715	0.0195922	-0.385626	0.236951	-0.0241691	0.464874	-0.0207208	1	-0.0577713	0.911347
Sla	1840.91	1006.65	1162.99	1202.28	420.954	1110.35	462.687	251.71	840.027	603.164	1443.11	521.371	356.778	128.69	769.926	1277.5	402.769	227.306	362.589	358.57	543.789	606.082	152.941	222.779	272.774	1368.93	687.851	-1.02085	0.02837	-0.221266	0.449264	-3.5e-06	1	0.0561904	1	0.0351747	1
Slamf6	133.38	45.2992	76.9262	52.4905	13.1548	36.1744	24.241	46.7188	55.3864	13.9909	59.306	13.7532	27.559	10.0933	21.0362	81.1705	32.0706	13.5155	14.8547	11.1061	55.3006	83.685	2.34093	7.57753	5.30394	56.049	21.6962	-1.87429	0.0062735	-0.221001	0.422799	-0.00110497	1	-0.0487618	1	-0.113689	0.540164
Slamf7	199.41	79.2735	150.544	106.856	26.3096	119.576	102.234	98.2049	129.235	88.6092	395.373	81.894	40.2213	21.4483	35.3408	198.555	113.19	101.981	104.658	100.749	138.96	55.79	27.3108	62.1357	20.4581	18.9997	98.0349	-1.17855	0.0272171	-0.1272	0.706026	-0.00409169	1	-0.229715	0.300088	-0.157472	0.404711
Slamf8	194.127	84.3068	124.902	106.856	22.7219	62.3004	32.6727	35.2775	83.0796	75.3955	212.513	46.2607	52.1387	10.0933	74.0475	165.463	15.092	17.2016	14.8547	23.7989	100.675	113.271	4.68185	19.7016	18.9427	59.8489	43.3925	-2.19498	0.000329915	-0.238581	0.412431	-0.0037866	1	0.0719611	1	-0.121096	0.599586
Slamf9	1253.24	402.659	559.99	461.792	175.796	703.391	226.601	160.179	443.091	419.728	756.152	383.839	233.879	59.2983	281.885	912.855	173.558	280.14	128.965	114.235	206.314	366.016	28.0911	87.8993	72.7398	163.397	140.624	-2.53693	0.000159148	-0.650498	0.110276	-0.0154928	0.620418	-0.126117	0.71474	-0.0654008	0.848682
Slc15a3	1918.82	1431.96	1686.59	1139.79	914.857	1374.63	785.198	401.401	327.703	1777.62	1457.94	1094.63	930.304	418.873	1061.07	1403	1123.41	761.783	817.681	765.53	882.682	648.347	282.472	324.318	359.153	1091.53	344.729	-1.28488	0.00950519	-0.341787	0.271399	-0.000559847	1	-0.275693	0.242628	0.00688292	1
Slc28a2	150.548	201.33	285.371	173.719	129.156	104.504	151.77	108.693	106.157	216.859	316.299	108.775	57.3526	73.1766	84.9863	108.019	106.587	81.0931	29.0341	28.5586	131.871	77.7679	27.3108	22.7326	64.405	146.297	25.7141	-1.36438	0.0100331	-0.628741	0.119229	-0.000433186	1	-0.0940512	0.962327	-0.0464439	0.997837
Slfn1	2168.41	889.625	917.324	496.16	348.004	972.689	523.817	162.086	235.392	772.61	1284.96	535.124	203.341	88.3166	361.823	1015.26	513.129	242.051	293.042	279.24	344.565	163.989	110.804	81.0795	53.7972	173.847	142.231	-2.71762	6.35e-05	-0.781317	0.0773818	-0.0278324	0.455367	-0.249073	0.249855	-0.0442756	0.969106
Slfn2	3473.16	1780.51	2673.39	1730.31	755.804	1890.11	895.863	531.069	1283.12	1828.92	3706.63	1490.97	1214.09	185.465	1357.26	3050.76	1095.12	867.45	738.681	775.843	1244.26	742.176	164.645	186.407	211.4	1672.92	466.067	-2.06596	0.00152983	-0.662916	0.107762	-0.00150022	1	-0.191234	0.41076	-0.0195142	1
Slfn3	437.116	294.445	282.89	193.09	120.785	243.172	115.935	63.8809	69.233	167.891	163.092	127.53	242.073	64.345	145.571	218.536	119.793	82.3217	184.333	218.95	134.707	89.6021	61.6444	56.8315	35.6122	100.698	58.6602	-1.98405	9.8e-05	-0.439208	0.200566	-0.00170951	1	-0.332821	0.150749	-0.0306114	1
Slfn4	3652.76	3935.99	12587.8	4296.72	2500.61	2010.69	7032	1484.51	276.932	7634.38	3024.61	7142.28	2316.45	315.416	1363.15	2141.65	8871.29	6255.22	2248.45	2036.39	3091.87	781.905	139.675	92.4458	169.726	607.039	353.568	-3.49771	1.17e-05	-1.30576	0.0185387	-0.0217535	0.571325	-3.8971	2.51e-06	-0.11915	0.509828
Slfn5	20772.9	17310.6	8655.44	6320.73	6732.87	16403.1	6443.89	3117.77	12032.7	7600.96	15528.3	4954.27	6904.66	4332.56	7956.74	12507.7	7038.55	3946.53	7118.08	7610.08	3966.75	2608.6	4424.35	4038.82	2896.71	2298.01	2697.57	-1.67733	0.000854027	-0.853058	0.0565559	-0.00794223	0.642521	-0.233873	0.355885	0.0606743	0.964216
Slfn8	948.186	400.143	1014.93	568.647	234.395	555.679	504.845	265.058	978.493	481.91	2001.58	503.242	273.356	73.1766	221.301	513.871	447.102	282.597	452.392	421.24	433.188	169.906	20.288	48.4962	73.4975	139.647	103.66	-3.28866	1.72e-08	-2.5976	6.03e-06	-0.0360463	0.30696	-2.40362	6.24e-05	-0.140695	0.577598
Slfn9	2138.04	989.032	1617.93	928.582	527.388	1365.58	1118.25	655.017	304.625	792.819	751.21	833.318	370.93	180.418	366.03	987.782	1100.78	663.489	650.229	604.491	830.927	513.099	90.5159	155.339	103.048	208.996	225.802	-2.77455	1.49e-06	-1.36853	0.0114003	-0.0325051	0.339989	-1.79037	0.00199077	-0.209986	0.289652
Smtnl1	13.2059	3.77493	9.92596	3.74932	0	0	20.0252	171.62	0	3.88637	0	6.25145	2.97936	242.24	6.73159	2.49755	24.5246	3.68605	0.675211	1.58659	0.708982	13.5248	1.56062	0	3.03083	6.64988	5.62495	-0.072637	0.914098	0.0961504	0.603093	-2.44245	0.0265841	-0.0337741	1	-0.275748	0.189304
Snx20	507.108	265.503	365.606	301.82	166.229	321.55	157.04	109.646	267.701	387.859	588.118	241.931	116.195	46.6816	227.191	474.535	190.537	148.671	156.649	164.212	253.815	229.077	62.4247	81.0795	111.383	217.546	150.267	-1.27484	0.0135129	-0.387947	0.236951	-0.000577223	1	-0.123159	0.833975	-0.0307698	1
Socs1	344.675	308.286	128.21	84.3598	307.344	144.698	246.626	86.7636	147.697	266.605	84.0169	135.656	121.409	136.26	95.0837	106.146	144.318	250.651	81.0254	95.1955	87.9137	45.6464	111.584	132.607	32.5814	32.2994	39.3747	-1.33688	0.00226574	-0.678071	0.0839531	-0.00610722	0.629083	-0.368543	0.116535	-0.0358128	1
Sp100	5987.57	3954.87	5321.14	3669.96	2706.3	4124.89	4378.14	2211.04	2201.61	3584.79	4235.44	3954.04	4600.13	1859.7	3096.53	4575.52	4673.81	5506.96	3426.7	3264.41	3266.99	1409.12	1071.36	1021.45	1221.42	1235.93	1697.93	-1.68649	2.43e-05	-0.83034	0.0404636	-0.123495	0.0853434	-1.6263	0.000113613	-0.136002	0.744505
Sp110	1247.96	738.628	1158.03	744.865	473.573	694.348	658.723	411.889	549.248	1085.07	1606.2	903.959	954.884	286.398	764.036	1070.2	750.829	1516.19	795.399	670.335	718.907	409.972	260.623	226.568	316.721	291.645	443.568	-1.43966	0.00126048	-0.352235	0.253515	-0.0122231	0.450409	-1.22294	0.00235148	-0.0991608	0.843144
Sp140	965.353	528.49	917.324	611.14	230.807	600.897	438.446	324.172	710.792	719.755	1398.63	594.513	617.472	234.67	387.908	977.792	399.939	858.849	513.836	481.53	565.058	462.381	213.024	215.202	241.708	396.143	388.122	-1.20819	0.00950519	-0.201298	0.49539	-0.00172935	1	-0.299799	0.207031	-0.113983	0.779603
Spi1	3730.68	2064.89	1282.1	1172.91	802.443	2468.9	785.198	620.693	1329.27	1477.6	3158.05	919.588	496.808	247.286	964.3	2280.89	917.784	862.535	461.169	413.307	909.623	1003.37	310.563	435.708	300.052	1214.08	419.461	-1.44577	0.0129662	-0.434975	0.204424	-0.000616318	1	-0.0566602	1	-0.0174417	1
Spib	190.165	118.281	166.26	154.972	47.8357	90.436	36.8885	20.9758	332.318	111.15	301.472	75.0174	140.03	20.1867	98.4495	274.106	70.7439	33.1744	23.6324	24.5922	192.134	352.491	24.1896	34.0989	31.066	79.7986	81.16	-1.11017	0.0272171	-0.231446	0.418015	-0.0017864	1	0.00640516	1	-0.0846967	0.750944
Spic	56.7855	45.2992	52.1113	38.743	15.5466	35.1696	8.43165	19.0689	106.157	18.6546	182.86	6.87659	32.0281	5.04666	22.7191	53.6974	13.2055	3.68605	8.77775	5.55307	53.8826	96.3645	3.90155	6.06202	3.78853	25.6495	6.42852	-2.31898	0.000605394	-1.17126	0.02612	-0.00129584	1	-0.0036372	1	-0.110816	0.602874
Spn	1179.29	451.733	1269.7	1231.65	331.262	684.299	278.245	202.13	300.01	660.682	815.458	709.539	297.191	152.662	753.097	851.041	220.721	78.6357	267.384	241.162	637.375	896.021	131.872	137.911	316.721	650.738	324.64	-1.55216	0.0020934	-0.408715	0.218869	-0.000236245	1	0.0835289	1	-0.020903	1
St18	67.3502	12.5831	158.815	190.591	11.9589	25.1211	17.9173	87.717	13.8466	6.21819	93.9012	8.12688	17.1313	5.04666	14.3046	39.3365	36.7868	29.4884	41.8631	52.3575	34.7401	146.237	3.12124	14.3973	7.57706	113.048	8.03564	-1.59666	0.014162	-0.110353	0.74998	0.000307437	1	-0.259628	0.225832	-0.119598	0.514571
Stap1	570.496	225.238	260.556	259.953	111.218	481.321	185.496	151.598	152.313	141.464	306.414	128.78	72.2494	51.7283	106.864	347.784	170.729	163.415	75.6237	87.2625	138.251	256.972	30.4321	66.6822	36.3699	62.6989	70.7137	-2.25021	0.000112151	-0.790535	0.0768925	-0.0159619	0.53747	-0.217872	0.356431	-0.148373	0.504116
Stat1	9436.96	5901.47	7563.58	4884.12	3757.49	5082.5	4294.87	2240.6	1375.43	4408.7	3765.93	4608.57	4635.88	1585.91	2921.51	5289.19	4021.08	4786.95	2905.43	2905.05	3746.26	1857.98	1599.63	1675.39	1158.53	1116.23	1884.36	-1.85689	5.11e-05	-0.362454	0.249382	-0.00913264	0.557131	-0.442483	0.0721556	-0.105892	0.801369
Stat2	4730.36	3934.74	5171.43	3278.78	3444.17	2857.78	3656.18	1598.93	1389.27	4186.4	3128.39	4544.18	4865.29	1384.05	2917.3	2858.45	3699.43	5685.12	2721.1	2864.59	2480.73	1047.33	916.863	1026	1213.09	1120.98	1203.74	-1.65132	2.33e-05	-0.824729	0.0380692	-0.00903889	0.474694	-1.69183	4.54e-05	-0.0506281	1
Stra6l	80.5562	31.4578	57.0743	69.9874	14.3507	27.1308	46.3741	120.134	23.0777	48.9682	74.1325	68.7659	30.5384	12.6167	46.2797	85.5412	88.6657	110.581	163.401	138.033	202.06	54.0994	6.24247	23.4903	26.5197	106.398	28.1248	-0.268484	0.376067	-0.0463229	1	-0.000375811	1	-1.01762	0.0185047	-0.200105	0.273868
Syt13	9.24415	20.133	38.0495	52.4905	5.97946	3.01453	1.05396	1.90689	0	6.21819	0	2.50058	32.0281	6.30833	26.9264	23.1024	0	1.22868	2.70085	6.34636	39.703	77.7679	4.68185	4.54652	8.33477	15.1997	8.03564	-1.38818	0.0126519	0.0696059	0.951717	-0.000632136	1	0.285497	0.194876	-0.11563	0.64069
Tagap	711.8	303.253	552.545	422.424	125.569	455.195	186.55	163.039	304.625	321.014	543.639	258.81	158.651	45.42	222.984	393.989	190.537	224.849	181.632	174.525	246.726	237.53	46.0382	84.1105	74.2552	345.794	203.302	-1.62832	0.0048527	-0.338881	0.277133	-0.000142077	1	-0.113506	0.842975	-0.0264524	1
Tent4a	1752.43	1331.29	1461.6	1071.06	1228.18	1207.82	927.482	635.948	863.104	994.133	780.863	1088.38	970.525	643.45	882.68	919.099	964.947	1071.41	831.86	772.67	794.768	571.425	634.391	672.884	556.156	497.791	619.548	-1.1373	1.81e-06	-0.594217	0.0185387	-0.000548277	1	-0.381833	0.068077	0.0752677	1
Tent5a	2101.06	1033.07	955.374	770.486	809.619	1340.46	785.198	1058.32	2326.23	415.064	1902.73	476.36	426.048	442.845	545.259	833.558	496.151	514.818	432.135	424.413	558.678	445.475	477.549	520.576	278.836	577.59	531.96	-1.29195	0.000863844	-1.06627	0.010594	-0.000229264	1	0.044808	1	0.00546157	1
Tfec	79.2356	40.2659	46.3211	50.6159	9.56713	22.1066	27.4029	29.5568	203.083	23.3182	247.108	6.87659	23.09	2.52333	26.9264	33.0926	10.3758	12.2868	7.42733	14.2793	36.1581	48.1823	7.02278	6.06202	5.30394	39.8993	8.03564	-1.75183	0.00900268	-0.737569	0.0840243	-0.000263948	1	-0.000136698	1	-0.0599673	0.855656
Tgm3	95.0827	17.6163	9.0988	10.6231	15.5466	38.1841	70.6151	368.03	23.0777	17.1	54.3639	16.2538	2.97936	1056.01	5.89014	25.5999	26.4111	12.2868	5.40169	7.93296	9.92574	9.29833	17.9471	8.33528	18.9427	5.6999	20.0891	-0.0831561	0.903794	-0.0209679	1	-3.27964	0.00248088	0.0699783	0.98792	-0.174616	0.267659
Tgtp1	569.176	294.445	405.31	210.587	86.1042	243.172	148.608	169.713	27.6932	102.6	222.398	123.779	125.133	34.065	106.864	234.77	184.877	278.911	44.564	45.2179	125.49	73.5414	50.7201	45.4652	6.81936	109.248	51.4281	-1.92907	0.00464018	-0.125103	0.697083	-0.00165022	1	-0.142828	0.593398	-0.0596714	0.859569
Tgtp2	1765.63	799.027	694.817	374.932	230.807	781.769	379.424	270.779	290.778	293.809	652.366	193.17	271.121	157.708	285.251	749.266	396.166	405.465	216.068	249.095	227.583	120.878	305.101	244.754	32.5814	102.598	107.678	-2.14224	0.000317582	-0.282262	0.347056	-0.0239867	0.441355	-0.176786	0.511694	-0.0407719	0.999671
Themis2	3244.7	1668.52	1521.98	856.095	698.401	1815.75	888.486	432.864	1167.73	1601.18	2471.08	1028.36	456.586	169.063	781.706	1692.72	1034.75	489.016	663.733	593.385	784.134	516.48	201.32	221.264	299.294	420.842	429.907	-2.13207	0.000299744	-0.933544	0.0515413	-0.00395761	1	-0.220566	0.345135	-0.0318109	1
Ticam2	303.736	130.864	153.025	170.594	58.5987	204.988	66.3993	90.5773	96.9261	73.841	375.605	50.0116	33.5178	16.4017	90.035	184.819	73.5737	58.9768	73.598	57.9106	95.7125	114.116	42.1367	62.1357	30.3083	72.1987	62.678	-1.51167	0.00510256	-0.302468	0.32235	-0.000325692	1	-0.049071	1	-0.0513039	0.985073
Tifab	1707.53	851.876	703.089	635.51	386.273	1179.69	462.687	244.082	1024.65	929.619	2223.98	553.253	220.472	109.765	564.612	912.855	363.152	293.655	498.981	521.989	505.504	468.298	226.29	297.797	276.563	543.39	408.211	-1.15913	0.0238176	-0.412124	0.219986	-0.000123639	1	-0.0473733	1	0.0196503	1
Tlr1	618.038	265.503	495.471	444.92	105.238	346.671	196.036	159.225	396.936	211.418	1042.8	115.652	75.9736	32.8033	121.169	390.867	168.842	106.895	88.4527	69.81	253.106	262.889	53.8413	51.5272	33.3391	183.347	78.7493	-2.24295	0.000205353	-0.933724	0.0518199	-0.000880902	1	-0.109992	0.841789	-0.0951034	0.741705
Tlr7	1205.7	466.833	742.793	643.009	193.734	710.425	413.151	318.451	410.782	345.887	983.492	169.414	148.968	87.0549	336.58	562.574	256.565	151.128	225.521	221.329	346.692	441.248	124.069	215.96	64.405	685.888	201.695	-1.28414	0.0210201	-0.270165	0.364194	-5.43e-05	1	0.0059506	1	-0.0353306	1
Tlr8	710.479	385.043	495.471	437.421	139.919	437.107	221.331	255.523	221.545	167.891	558.465	95.6471	49.1594	51.7283	191.85	259.121	206.572	87.2365	137.743	141.207	199.224	335.585	98.3189	174.283	25.0043	327.744	118.928	-1.52458	0.00744045	-0.251451	0.395192	3.66e-05	1	-0.017772	1	-0.0531291	0.964216
Tlr9	1500.19	600.214	875.966	558.649	371.922	684.299	525.924	239.315	350.78	726.751	1092.22	435.101	204.831	109.765	311.336	553.832	471.626	208.876	266.033	244.335	469.346	355.027	67.8869	144.731	76.5283	230.846	197.677	-2.22622	5.37e-05	-0.842344	0.0651272	-0.00208372	1	-0.216425	0.379225	-0.0988915	0.763033
Tm4sf19	56.7855	27.6828	68.6546	67.4878	26.3096	20.0969	12.6475	49.5792	32.3087	31.8682	64.2482	22.5052	14.8968	10.0933	37.8652	42.4584	14.1488	33.1744	23.6324	20.6257	56.0096	54.0994	3.12124	14.3973	4.54624	80.7485	16.0713	-1.06963	0.0273195	-0.213285	0.457563	-0.000125252	1	-0.073933	1	-0.0702322	0.847917
Tmem106a	997.048	632.93	911.534	699.249	548.914	646.115	530.14	587.323	784.64	578.292	1611.15	601.389	427.538	305.323	520.857	887.88	542.37	662.26	414.58	392.681	785.552	578.187	278.57	394.789	232.616	467.392	335.086	-1.09515	0.00314612	-0.487074	0.134237	-0.000945816	1	-0.214107	0.51736	-0.161072	0.687252
Tnf	261.477	216.429	432.606	226.209	59.7946	180.872	128.583	102.972	27.6932	165.559	286.646	119.403	55.1181	11.355	49.6455	144.858	420.69	129.012	39.1623	34.1117	112.728	225.696	5.46216	28.7946	19.7004	219.446	18.482	-1.13413	0.0300123	-0.185705	0.477744	0.000139214	1	-0.369404	0.126651	-0.0505345	0.8747
Tnfaip8	632.564	507.099	521.94	584.269	209.281	538.597	335.158	420.47	886.182	247.173	869.822	217.55	189.934	158.97	293.666	476.408	277.316	197.818	197.837	220.536	387.104	500.419	173.229	217.475	121.991	449.342	270.801	-1.16462	0.00554565	-0.52429	0.134402	-0.000155036	1	0.0286672	1	-0.11944	0.796434
Tnfaip8l2	664.258	303.253	190.248	193.715	167.425	457.204	194.982	146.831	498.477	198.205	864.879	144.408	99.8084	65.6066	174.18	429.579	151.864	206.419	117.487	109.475	199.933	192.729	57.7429	90.1726	66.6782	199.496	77.1422	-1.30973	0.019118	-0.770751	0.0821807	-0.00109666	1	-0.0968889	0.921013	-0.0408029	1
Tnfrsf8	47.5413	16.358	31.4322	17.4968	4.78357	10.0484	8.43165	9.53446	0	17.1	14.8265	13.128	11.1726	0	11.7803	14.9853	24.5246	8.60078	10.1282	13.486	24.8144	17.7514	1.56062	1.51551	5.30394	14.2497	8.03564	-1.04886	0.0354029	-0.0751564	0.897389	-0.00028857	1	-0.163728	0.449939	-0.054929	0.849129
Tnfsf8	274.683	103.181	71.136	39.3679	39.4644	168.814	88.5324	12.3948	78.464	64.5137	84.0169	51.887	49.9042	13.8783	22.7191	161.717	52.8221	51.6047	12.1538	8.72625	49.6287	49.8729	0.780309	9.09303	6.06165	8.54985	12.0535	-3.21038	0.000613042	-0.838347	0.0521988	-0.391215	0.0977373	-0.188796	0.333456	-0.0962203	0.540164
Tnnc2	2.64119	1.25831	0	0.624887	0	0	277.191	2016.54	4.61553	1.55455	0	0	1.48968	2919.49	7.57304	1.24878	284.862	0	3.37606	3.96648	0	0	0	0	3.03083	0	2.41069	-0.0118657	0.969245	-0.0241101	1	-7.86119	0.0140692	-0.10556	0.388491	0.0523547	0.587342
Tnni2	25.0913	10.0665	21.5062	16.872	25.1137	15.0727	284.568	2068.02	13.8466	25.65	44.4795	26.8812	23.8348	2395.9	32.8165	41.834	260.338	24.5737	34.4358	17.4525	26.2323	16.0608	2.34093	8.33528	34.8545	15.1997	15.2677	0.00745454	0.99151	-0.0583112	0.979393	-5.77941	5.47e-06	-0.20136	0.305563	-0.604376	0.0804718
Tnnt3	25.0913	12.5831	58.7286	34.3688	49.0316	21.1017	453.201	3399.99	23.0777	42.75	14.8265	34.383	52.1387	4390.6	35.3408	19.9804	443.328	15.9729	69.5468	102.335	14.8886	26.2044	14.0456	19.7016	75.0129	14.2497	41.7854	0.00430561	0.99865	-0.0236725	1	-5.83579	2.82e-05	-0.21248	0.273345	-0.439234	0.118729
Tns4	87.1591	64.1738	39.7038	30.6195	34.6809	77.373	24.241	40.0447	87.6951	34.2	84.0169	26.2561	20.8555	41.635	41.231	68.0583	19.8083	24.5737	14.8547	23.0056	30.4862	49.0276	16.3865	12.8818	12.881	9.49983	19.2855	-1.80201	6.71e-05	-1.25301	0.00990545	-1.18796	0.00895046	-0.0990471	0.970575	-0.185784	0.514571
Top2a	863.668	927.375	478.928	567.397	342.025	1003.84	188.658	268.872	129.235	781.937	1023.03	723.292	429.772	204.39	798.535	1360.54	415.031	347.717	141.794	137.24	881.973	999.993	122.509	96.9923	103.806	230.846	241.069	-1.38784	0.0149978	-0.267398	0.368309	-0.0358294	0.340941	-0.0822024	0.990642	-0.128523	0.582798
Tor3a	2625.34	1683.62	2116.71	1284.77	1492.47	1290.22	1507.16	955.353	669.252	1549.11	1462.88	1324.06	1437.54	812.513	981.971	1382.4	1213.97	1383.5	915.587	902.77	1124.44	767.535	1037.81	911.576	672.086	629.839	717.583	-1.05554	0.000560289	-0.193881	0.500238	-0.000698782	1	-0.238571	0.431789	-0.0672294	1
Tpm2	242.989	398.884	679.101	666.13	1140.88	395.909	1042.36	4742.44	1583.13	979.365	800.631	726.418	1332.52	7238.18	1110.71	1010.88	931.933	372.291	941.92	1312.9	384.268	597.629	383.912	462.229	1982.16	260.295	449.996	0.0385688	0.963425	-0.134903	0.675672	-1.653	0.0128383	-0.0902119	0.919824	-0.0872996	0.74993
Trafd1	3568.24	2336.68	3195.33	1931.53	2049.76	2310.14	1947.71	977.282	1250.81	2871.25	2461.2	2710.63	2778.99	992.931	1942.91	2613.69	2007.24	3085.22	1725.17	1724.62	1921.34	1014.36	706.18	688.039	1054.73	1532.32	967.492	-1.13206	0.00772434	-0.426817	0.19006	-0.00105273	1	-0.492886	0.0461709	-0.00625957	1
Trem3	106.968	76.7569	111.667	60.614	40.6603	57.2761	38.9964	10.4879	13.8466	100.268	59.306	49.3864	14.8968	17.6633	38.7066	76.7997	55.6519	19.6589	20.9316	19.0391	29.0682	43.9558	14.8259	12.124	25.762	34.1994	32.1426	-1.05557	0.0272171	-0.117066	0.749921	-0.000720912	1	-0.0558181	1	-0.000830301	1
Treml2	603.511	296.961	335.001	166.845	119.589	306.478	224.493	51.4861	156.928	333.45	410.2	226.928	147.478	46.6816	160.717	357.15	201.856	103.209	84.4014	67.4301	147.468	60.0165	45.2579	22.7326	65.9205	99.7482	81.9636	-1.76141	0.00556108	-0.491928	0.172793	-0.00511776	0.974969	-0.13527	0.676137	-0.00533086	1
Trim12c	2371.79	1884.95	1280.45	1207.28	920.837	2315.16	1174.11	869.542	1384.66	1064.09	1665.51	922.714	1446.48	604.338	970.19	1821.34	1128.13	1001.38	896.681	926.569	798.313	657.646	820.105	786.547	434.923	664.988	629.191	-1.08752	0.00757686	-0.457346	0.166034	-0.00115758	1	-0.16584	0.711353	-0.00417827	1
Trim14	698.594	479.416	469.002	348.687	404.211	399.928	279.299	239.315	226.161	567.41	439.853	488.238	396.254	180.418	433.346	477.657	327.308	590.996	415.255	421.24	318.333	187.657	153.721	161.401	243.224	160.547	193.659	-1.23247	0.00151396	-0.455166	0.16078	-0.00280193	0.799745	-0.768729	0.00663888	0.00122508	1
Trim21	780.47	573.789	767.608	534.278	461.614	552.664	465.849	332.753	452.322	645.137	518.928	597.013	761.225	280.09	514.967	686.203	482.002	527.105	486.827	508.502	396.321	327.978	310.563	319.772	303.84	264.095	328.658	-1.00455	0.000433086	-0.36756	0.175008	-0.00226583	0.718076	-0.400493	0.0687221	-0.00284886	1
Trim29	15.8471	11.3248	5.79014	12.4977	1.19589	3.01453	7.3777	50.5326	18.4621	5.44091	34.5952	3.75087	0.744839	103.457	3.3658	4.99511	3.77301	7.3721	14.1794	14.2793	11.3437	5.07182	0.780309	0	3.03083	7.59986	2.41069	-0.580862	0.124298	-0.0621982	0.940413	-2.21362	0.0158512	-0.137022	0.508604	-0.179709	0.227041
Trim30a	5806.65	3315.65	3666.82	2127.74	1439.85	3449.63	2062.59	1006.84	1218.5	2038.01	2940.59	1759.16	2272.5	585.413	1771.25	3953	2013.84	1684.52	1191.75	1200.26	1551.25	762.463	580.55	507.694	382.642	529.14	676.601	-2.35658	1.17e-05	-0.915614	0.0513168	-0.180098	0.0974845	-0.417017	0.0936619	-0.0776475	0.8607
Trim30b	172.998	284.378	473.137	214.336	112.414	147.712	281.406	68.6481	27.6932	267.382	74.1325	237.555	84.1668	70.6533	106.023	107.395	286.749	143.756	176.23	168.972	157.394	116.652	53.061	38.6454	80.3169	117.798	127.767	-1.07313	0.0251781	-0.101891	0.83329	-0.00018581	1	-0.399029	0.101509	-0.0695689	0.911232
Trim30c	122.815	60.3989	245.668	62.4887	21.526	50.2422	46.3741	19.0689	46.1553	118.923	286.646	66.2653	51.3939	6.30833	32.8165	66.8095	41.5031	46.6899	28.3589	24.5922	30.4862	4.22651	0.780309	1.51551	4.54624	4.74991	6.42852	-5.02579	1.12e-08	-2.85317	0.000338324	-1.82014	0.0140278	-3.22831	0.000100856	-0.089044	0.693507
Trim30d	715.761	268.02	255.593	73.7367	71.7535	342.652	164.417	48.6257	161.544	192.764	706.73	143.783	143.009	3.785	116.961	457.052	128.282	138.841	33.0854	27.7653	77.988	4.22651	0	4.54652	0.757706	9.49983	13.6606	-5.97304	6.23e-05	-1.81663	0.0152087	-1.97364	0.0269478	-0.70036	0.0525067	-0.0550898	0.69843
Trim34a	150.548	134.639	470.656	338.689	157.858	152.736	254.004	126.808	73.8485	403.405	108.728	536.374	723.239	105.98	248.227	238.516	256.565	421.438	413.229	441.072	400.575	186.812	58.5232	65.9245	256.105	195.696	271.605	-0.234419	0.402961	-0.104972	0.831739	-0.00029506	1	-1.04464	0.00522992	-0.0972622	0.843144
Tulp1	26.4119	12.5831	12.4074	20.6213	19.1343	11.0533	20.0252	28.6034	133.85	31.0909	44.4795	24.3806	46.18	12.6167	47.9626	8.74143	29.2408	176.93	103.983	94.4022	34.0311	22.8232	14.0456	15.1551	24.2466	34.1994	17.6784	0.00667311	0.993224	-0.22968	0.422726	0.000304463	1	-1.0653	0.0190298	0.0275564	1
Twist2	47.5413	42.7825	23.1606	23.7457	56.2069	60.2907	56.9137	35.2775	604.635	37.3091	232.282	27.5064	33.5178	49.205	41.231	35.5901	29.2408	18.4302	30.3845	28.5586	21.2694	22.8232	28.8714	26.5213	42.4316	14.2497	35.3568	-0.103651	0.823649	-1.13935	0.0259346	-0.00055156	1	0.0136493	1	0.0694953	0.888182
Tyrobp	2630.62	1387.92	987.633	1026.06	688.834	2009.69	750.417	687.434	1730.82	1632.27	3988.33	928.34	601.085	198.082	1408.59	2720.46	767.807	1317.15	924.364	841.687	972.014	979.706	337.874	484.962	350.818	1120.03	518.299	-1.01175	0.0272171	-0.444537	0.199248	-0.00114911	1	-0.149869	0.664286	-0.0219234	1
Uba7	1826.38	1742.76	2810.7	1854.04	2890.47	1132.46	2647.54	1105.04	369.242	3530.38	1621.03	2798.77	3360.71	1473.63	1598.75	1215.06	2809	5541.36	2669.11	2532.2	2087.95	1059.16	709.301	675.158	1685.9	822.685	1153.92	-0.32304	0.252883	-0.150901	0.647157	-0.000472838	1	-1.66071	0.00060571	-0.0507667	1
Unc93a	6.60296	7.54986	15.7161	4.9991	0	5.02422	5.26978	4.76723	69.233	5.44091	118.612	10.0023	3.72419	1.26167	0.841449	4.37072	8.48927	0	4.05127	0.793296	9.21676	3.38121	0	0	0.757706	2.84995	0	-1.52113	0.0272171	-0.990838	0.0384908	-0.00214278	1	-0.125009	0.442989	-0.0347704	0.869623
Unc93b1	3164.14	1688.65	3132.47	3022.58	1686.21	1987.58	1762.22	1456.87	1601.59	2310.06	3459.52	2218.01	1258.03	827.653	1624.84	2083.58	1926.12	2070.33	1805.52	1758.74	2325.46	2024.5	841.954	1235.89	986.534	1853.42	1140.26	-1.02975	0.00103767	-0.358487	0.198259	-9.23e-05	1	-0.34372	0.143553	-0.125179	0.841814
Usp18	3393.92	1771.7	2905.82	1366.63	1634.78	1623.83	1516.64	740.827	336.934	2003.81	1176.24	2007.34	2195.04	333.08	1227.67	1975.56	1318.67	2287.81	745.433	736.178	1225.83	273.033	209.903	272.791	220.493	293.545	351.961	-2.39389	6.81e-05	-0.856788	0.0647335	-0.0850204	0.193258	-1.173	0.0131504	-0.072403	0.847917
Vav1	1212.3	656.838	1727.12	1419.12	392.252	865.171	568.083	418.563	973.877	1254.52	3009.78	1128.39	580.23	126.167	814.522	1738.3	778.183	777.756	781.895	705.24	1258.44	1186.81	80.3718	162.917	349.303	1335.68	440.353	-1.33731	0.0156672	-0.504746	0.170284	-0.000406781	1	-0.334017	0.148555	-0.0747968	0.856414
Was	920.453	420.276	459.903	401.178	220.044	592.858	194.982	149.691	553.864	408.846	1176.24	309.447	149.713	90.8399	352.567	790.475	201.856	175.702	164.752	150.726	318.333	290.784	70.2278	97.7501	128.052	323.944	161.516	-1.59572	0.00485636	-0.673748	0.106116	-0.00143545	1	-0.056599	1	-0.0113704	1
Xaf1	2995.1	2063.63	1963.69	1321.64	1681.42	1968.49	4878.77	3712.72	1943.14	1164.36	1052.68	1452.84	3407.64	767.093	902.033	1487.29	4787.95	5161.7	1670.47	1745.25	1025.19	334.74	430.731	450.863	265.955	345.794	497.406	-2.06831	5.15e-06	-1.78432	0.000144329	-0.779298	0.0170794	-2.78235	1.2e-09	-0.220575	0.380599
Zbp1	5122.58	2657.55	2740.39	1270.4	1101.42	2546.28	1782.24	619.74	567.71	1559.99	2179.5	1620.38	1698.23	204.39	861.644	2163.5	1511.09	3357.99	360.563	344.29	916.713	205.409	94.4174	114.421	73.4975	253.645	177.588	-3.72154	9.61e-06	-1.19407	0.0249415	-0.221582	0.128317	-1.68234	0.00872218	-0.0803003	0.718385
Zc3h12d	347.316	230.271	277.927	174.344	92.0837	220.061	132.799	133.482	290.778	280.596	617.771	176.916	71.5045	41.635	153.144	239.141	156.58	140.07	90.4783	91.229	221.202	200.337	56.9626	64.409	62.1319	196.646	83.5707	-1.18879	0.0190022	-0.433264	0.203998	-0.00022948	1	-0.1141	0.874448	-0.0684104	0.918208
Zcchc2	2519.69	2082.5	1897.51	1444.11	1529.55	1818.77	1511.37	1057.37	812.333	1372.67	1072.45	1392.82	1326.56	903.353	1223.47	1288.74	1709.17	1538.31	1226.18	1278	1054.26	715.972	791.233	916.123	716.033	732.437	736.065	-1.19655	5.48e-06	-0.489319	0.0660711	-0.00102199	1	-0.548119	0.00621666	-0.00162392	1
Zfp853	31.6942	30.1994	17.3704	14.3724	32.2891	37.1792	25.295	5.72067	96.9261	13.9909	29.653	15.0035	19.3658	20.1867	16.829	14.9853	23.5813	14.7442	30.3845	17.4525	14.8886	5.07182	11.7046	8.33528	10.6079	8.54985	11.2499	-0.517963	0.132927	-1.26897	0.0165039	-0.00049193	1	-0.241107	0.299659	0.082155	0.8221
Znfx1	10114.4	6977.33	7193.84	4456.69	4532.43	6265.21	4819.74	2578.12	2326.23	6644.13	6034.39	5975.13	5708.45	2634.36	4519.42	5595.14	4384.24	4495.75	3194.43	3184.29	3735.62	2176.66	2131.8	2335.39	2386.78	2391.11	2278.91	-1.36618	0.000217178	-0.37792	0.207676	-0.00249715	0.807657	-0.290527	0.249451	-0.00469617	1

## Sheet: human DEGs
	normalized count																									log2FoldChange (unifected / (n)dpi and adjusted p value
Days post infection (dpi)	2dpi	2dpi	2dpi	2dpi	4dpi	4dpi	4dpi	4dpi	4dpi	4dpi	4dpi	4dpi	4dpi	7dpi	7dpi	7dpi	14dpi	14dpi	28dpi	28dpi	uninfected	uninfected	uninfected	uninfected	uninfected	28dpi	28dpi	14dpi	14dpi	7dpi	7dpi	4dpi	4dpi	2dpi	2dpi
name	Sample_1732_Lung_2dpi	Sample_1733_Lung_2dpi	Sample_1900_Lung_2dpi	Sample_1901_Lung_2dpi	Sample_1734_Lung_4dpi	Sample_1735_Lung_4dpi	Sample_1737_Lung_4dpi	Sample_1738_Lung_4dpi	Sample_1765_Lung_4dpi	Sample_1761_Lung_4dpi	Sample_1766_Lung_4dpi	Sample_1926_Lung_4dpi	Sample_1925_Lung_4dpi	Sample_1736_Lung_7dpi	Sample_1905_Lung_7dpi	Sample_1904_Lung_7dpi	Sample_1739_Lung_14dpi	Sample_1740_Lung_14dpi	Sample_2021_Lung_28dpi	Sample_2020_Lung_28dpi	Sample_1720_Lung_uninfected	Sample_1721_Lung_uninfected	Sample_2025_Lung_uninfected	Sample_1906_Lung_uninfected	Sample_1894_Lung_uninfected	log2FoldChange_28dpi	padj_28dpi	log2FoldChange_14dpi	padj_14dpi	log2FoldChange_7dpi	padj_7dpi	log2FoldChange_4dpi	padj_4dpi	log2FoldChange_2dpi	_2dpi
AC019205.1	9.91218	4.78009	25.3475	18.671	11.8137	4.35782	4.19658	8.089	38.5871	8.03362	20.4093	18.8533	22.4867	2.44161	15.4869	10.3261	19.5477	9.90663	27.7372	23.8344	2.01527	1.58233	11.6621	4.14821	10.8664	-0.345774	NA	-0.558928	0.0963273	-0.00721036	1	-1.14265	0.0322677	-0.500527	0.155933
ACE2	13.2162	7.17013	3.16843	0	11.8137	132.914	50.359	26.5781	0.838849	15.3369	3.01121	55.303	33.0936	2.44161	39.3624	76.5855	9.77383	31.371	1.13213	0	0	0	0	0	1.81107	-0.0920339	0.727474	-0.290062	0.260457	-5.51121	0.010499	-1.85666	0.0162934	-0.168282	0.346787
ADGRA2	56.169	63.3362	35.6449	20.4214	87.7589	93.6932	125.897	26.5781	759.998	74.4935	565.997	77.9269	34.3665	69.5858	58.721	22.3733	68.4168	59.4398	18.1141	5.56137	23.5115	22.1526	133.281	18.6669	52.5211	0.588746	0.154884	-0.204439	0.77907	-0.00672933	1	-1.07906	0.0282741	-0.0835626	1
ADGRL2	42.9528	13.1452	0.792109	0.583469	11.8137	37.0415	12.5897	8.089	404.325	0	512.464	1.25689	0	8.54562	1.93586	2.58153	48.8691	34.6732	2.26426	0.39724	3.35878	0	0	1.55558	1.81107	0.0113323	0.985328	-1.02969	0.0433316	-0.00737673	1	-3.0929	0.00364513	-0.306642	0.204259
AEBP1	42.9528	76.4814	54.6555	51.9288	145.14	100.23	121.701	83.2011	353.875	134.381	373.837	304.166	107.766	79.3522	171.001	73.1434	234.572	297.199	93.9669	31.382	45.0077	17.4056	119.953	50.8156	81.4983	0.218241	0.722952	-2.31519	0.000129397	-0.0181428	1	-1.39805	0.00515633	-0.0514815	1
AFF3	75.9934	132.647	308.13	252.059	177.206	135.093	201.436	192.98	272.626	94.9428	91.5632	268.974	213.411	185.562	149.061	204.802	263.893	249.317	426.814	432.992	98.0765	34.8112	211.584	69.4825	152.13	-1.21569	0.00640298	-1.24803	0.00145266	-0.11419	0.526282	-0.614869	0.0465459	-0.493218	0.146978
AJUBA	39.6487	14.3403	3.16843	5.83469	5.06301	32.6837	4.19658	3.46671	250.456	0	132.94	2.51377	8.06127	1.2208	9.034	8.60511	9.77383	8.25552	3.96246	1.58896	1.34351	1.58233	0	2.59263	3.62215	0.0638361	0.893547	-0.192622	0.512574	-0.00723141	1	-2.87388	0.00493796	-1.0071	0.0283899
AKAP12	95.8178	59.7511	16.6343	14.0033	28.6904	95.8721	54.5556	39.2894	1768.17	34.3255	724.699	45.2479	35.6393	19.5329	70.3361	83.4695	195.477	64.3931	23.2087	19.862	29.5573	12.6586	16.6601	19.704	19.9218	0.0762288	0.896544	-0.444342	0.151723	-0.0139947	1	-1.53069	0.0232851	-0.197658	0.557459
AMOTL2	46.2568	10.7552	1.58422	2.91735	3.37534	32.6837	20.9829	3.46671	367.176	5.1123	224.837	5.02754	1.69711	3.66241	6.45286	6.02358	19.5477	37.9754	2.83033	0.39724	0.671757	0	4.99804	1.03705	1.81107	0.0611231	0.879564	-1.25908	0.0405958	-0.00979995	1	-2.86245	0.00632427	-0.552639	0.0735782
ANGPTL2	23.1284	4.78009	0	0	5.06301	13.0735	0	2.31114	128.464	0	85.6523	0	0	1.2208	0	0.860511	0	14.8599	0	1.19172	0	0	0	0	0	-3.27369	NA	-15.7252	0.00263464	-19.4703	0.000492198	-18.3315	6.42e-05	-19.8852	2.61e-06
ANKRD13B	36.3447	22.7054	30.1001	26.8396	32.0658	17.4313	12.5897	11.5557	101.381	8.03362	43.6068	16.3395	38.6092	25.6369	36.7813	19.7917	29.3215	9.90663	31.1336	22.6427	0	3.16466	29.9882	8.81494	12.6775	-0.118503	0.836624	-0.221464	0.572338	-0.0232562	1	-1.29586	0.029256	-0.669798	0.0769236
ANXA6	991.218	1504.53	1718.08	1489.6	1507.09	860.67	541.359	492.273	2320.02	704.767	1134.45	904.958	1644.07	899.732	1484.16	2437.83	410.501	566.329	2046.89	1580.62	350.657	316.466	969.619	504.526	1148.22	-0.39682	0.455454	-0.137322	1	-0.294375	0.154346	-0.846215	0.0161781	-1.14737	0.00229584
ARHGAP42	62.7772	43.0208	27.7238	39.6759	33.7534	43.5782	58.7522	34.6671	284.61	12.4156	190.822	10.0551	14.8497	26.8577	20.6491	24.9548	39.0953	31.371	26.6051	31.7792	13.4351	0	19.9921	16.5928	19.9218	-0.308485	0.522105	-0.365119	0.276196	-0.0161045	1	-1.93474	0.00511661	-0.99297	0.0259406
ARL17B	9.91218	5.97511	20.5948	19.838	0	6.53674	75.5385	69.3343	5.51244	4.38197	8.92212	2.51377	3.81849	17.0912	3.22643	3.44204	78.1906	26.4177	19.8123	24.2317	8.06108	3.16466	9.99607	5.18526	28.9772	-1.05653	0.0143846	-0.472687	0.132798	-0.00933482	1	0.0847121	0.749725	-0.0868097	1
ARNT2	19.8244	20.3154	6.33687	5.25123	20.2521	15.2524	4.19658	2.31114	445.189	2.92132	172.754	2.51377	15.6983	6.10402	10.9699	6.02358	9.77383	21.4644	6.22672	5.56137	0.671757	6.32932	3.33202	2.59263	5.43322	0.0401061	0.945149	-0.282437	0.335836	-0.00765039	1	-2.04343	0.0119768	-0.452964	0.139731
AUXG01000058.1	6.60812	3.58507	1.58422	1.16694	5.06301	19.6102	8.39317	1.15557	222.295	1.46066	143.981	5.02754	1.69711	0	6.45286	0	29.3215	3.30221	4.52853	1.58896	0	0	14.9941	2.0741	5.43322	0.216449	0.428351	-0.238424	0.342588	0.00567227	1	-2.15348	0.0150255	-0.0596048	1
BAALC	23.1284	8.36515	7.92109	3.50082	8.43836	45.7572	16.7863	6.93343	26.8432	8.03362	27.324	8.7982	1.27283	2.44161	3.22643	1.72102	39.0953	54.4865	2.26426	1.19172	2.01527	4.74699	4.99804	5.70379	0	0.286492	NA	-0.768677	0.0541466	0.00540704	1	-1.31696	0.0355674	-0.132287	0.788817
BANK1	49.5609	76.4814	177.432	100.357	64.1315	102.409	151.077	86.6679	12.1034	43.8197	13.3832	162.138	192.198	98.8851	94.2117	241.804	29.3215	66.0442	387.189	602.217	49.0383	17.4056	61.6424	49.7785	65.1986	-1.48035	0.00316142	-0.028627	1	-0.0528368	0.669208	-0.059755	0.861195	-0.132596	0.855185
BICC1	3.30406	4.78009	0.792109	1.16694	3.37534	15.2524	0	1.15557	480.421	0	198.629	0	3.81849	1.2208	0.645286	1.72102	0	9.90663	0.566066	0.39724	0	0	0	1.55558	0	0.063029	0.840696	-0.190257	0.421301	-0.00234098	1	-1.66843	0.0238648	-0.132132	0.546828
BICD1	69.3853	90.8217	133.866	115.527	92.8219	45.7572	100.718	102.846	79.3312	48.932	74.0536	85.4682	96.3109	100.106	58.0757	62.8173	97.7383	92.4619	139.818	181.142	37.6184	41.1405	106.625	44.0747	114.098	-1.00233	0.0282408	-0.319609	0.541993	-0.0154895	1	-0.082132	0.805459	-0.340928	0.310126
BLNK	151.987	99.1868	184.561	150.535	111.386	139.45	205.633	190.669	65.4303	86.1788	152.011	207.386	170.135	115.976	120.023	164.358	224.798	277.386	241.144	353.941	108.825	118.675	84.9666	76.7419	112.287	-1.26968	0.00361777	-0.579026	0.0848508	-0.0194035	1	-0.038835	0.921755	-0.160271	0.733451
BMERB1	16.5203	14.3403	11.8816	12.8363	8.43836	15.2524	0	3.46671	278.138	1.46066	118.218	8.7982	16.5468	13.4288	9.67928	15.4892	9.77383	14.8599	18.6802	19.862	1.34351	1.58233	3.33202	5.70379	1.81107	-0.174672	0.667634	-0.278273	0.31208	-0.0164683	1	-1.26408	0.0404483	-0.554288	0.0896729
BOC	9.91218	7.17013	0	0.583469	8.43836	15.2524	4.19658	1.15557	109.53	0	125.133	0	0.848554	2.44161	0	0	29.3215	9.90663	0.566066	4.36965	0	0	0	0	0	-0.201783	NA	-0.789158	0.0884527	-0.004316	1	-1.62003	0.0239065	-0.253824	0.196797
BRSK1	0	8.36515	4.75265	3.50082	15.189	6.53674	4.19658	2.31114	48.8929	8.76395	64.4623	7.54131	15.6983	1.2208	16.7774	7.7446	0	6.60442	6.22672	8.34205	0	0	8.33006	1.03705	7.24429	-0.0419084	NA	-0.129454	0.776655	-0.00799284	1	-1.49852	0.0314786	-0.114114	0.805432
BX890604.2	79.2975	77.6764	169.511	119.028	79.3206	45.7572	62.9487	39.2894	166.691	11.6853	99.3701	54.0461	77.6427	80.573	58.0757	57.6542	29.3215	33.0221	164.725	159.293	11.4199	17.4056	71.6385	50.297	137.642	-0.782148	0.0870771	-0.0960613	1	-0.0290382	1	-0.335295	0.227613	-1.09196	0.00783771
C14orf132	36.3447	11.9502	0	0.583469	5.06301	41.3993	12.5897	2.31114	696.724	0	292.534	0	1.27283	12.208	0.645286	0	0	16.511	0	0.39724	0.671757	0	1.66601	0	1.81107	0.00364365	0.99455	-0.141226	0.621007	-0.0088456	1	-1.63251	0.0249774	-0.313388	0.15184
CACNA1H	26.4325	5.97511	0.792109	1.75041	25.3151	10.8946	8.39317	2.31114	67.2278	4.38197	77.1763	2.51377	14.8497	1.2208	14.1963	1.72102	19.5477	9.90663	3.39639	25.8206	0	0	0	0.518526	21.7329	-0.226719	NA	-0.272309	0.285019	-0.00952312	1	-1.83085	0.0218021	-0.290438	0.198767
CALD1	234.588	106.357	3.96054	1.16694	75.9452	276.722	71.3419	11.5557	3878.96	3.65164	2053.65	3.77066	8.06127	20.7537	8.38871	1.72102	127.06	161.808	3.39639	2.38344	13.4351	14.241	14.9941	2.0741	9.05537	0.285531	0.381571	-0.325759	0.25565	0.000909528	1	-2.6267	0.00565306	-0.286448	0.295625
CARMN	13.2162	0	0	0	0	0	8.39317	0	152.311	0	476.999	0	0.424277	0	0.645286	0	0	1.6511	0	0	0	0	0	0	0	0	1	-4.26578	0.063176	-14.598	0.0197963	-1.62263	0.0227207	-23.2773	0.000465957
CAV1	208.156	88.4316	12.6737	15.7537	52.3178	217.891	41.9658	9.24457	675.034	5.1123	542.465	7.54131	6.78843	18.312	5.80757	18.9312	146.607	140.344	7.92492	56.0109	6.04581	14.241	1.66601	2.0741	5.43322	-0.367671	0.267318	-2.21312	0.00801767	-0.0214432	1	-3.17797	0.001253	-2.91651	0.00141788
CAV2	26.4325	13.1452	0.792109	0.583469	8.43836	28.3259	8.39317	1.15557	291.081	0.730329	145.542	2.51377	1.27283	3.66241	1.29057	3.44204	29.3215	1.6511	0.566066	2.78068	0.671757	3.16466	0	0	0	-0.123753	0.680403	-0.202998	0.410503	-0.0161948	1	-1.39498	0.0344329	-0.282308	0.187044
CBX2	19.8244	20.3154	16.6343	15.7537	37.1288	34.8626	16.7863	13.8669	114.203	6.57296	73.3844	17.5964	17.3954	21.9745	29.6831	10.3261	9.77383	9.90663	20.9444	16.2869	4.03054	11.0763	28.3222	8.81494	21.7329	0.0914469	0.90044	0.000423118	1	-0.00709672	1	-1.16672	0.0193167	-0.140184	0.829226
CCDC102A	23.1284	44.2158	26.9317	22.1718	27.0027	17.4313	12.5897	17.3336	83.4056	42.3591	74.7227	23.8808	64.9144	23.1953	64.5286	61.0963	0	14.8599	39.6246	30.5875	6.71757	0	14.9941	6.74084	21.7329	-0.417633	0.349982	-0.119276	0.992546	-0.541506	0.0327255	-1.00719	0.0358487	-1.07485	0.0187604
CCN2	158.595	74.0914	4.75265	2.91735	47.2548	196.102	50.359	5.77786	165.493	2.92132	65.3545	5.02754	2.96994	15.8704	6.45286	2.58153	156.381	135.391	2.83033	2.78068	6.04581	11.0763	6.66405	3.62968	9.05537	0.272187	0.469699	-0.711717	0.0588926	0.000438563	1	-1.99322	0.0116238	-0.426986	0.169083
CD200	23.1284	32.2656	77.6266	64.1816	21.9397	23.968	0	26.5781	82.2072	5.1123	52.3059	23.8808	55.5803	18.312	32.9096	92.9352	0	31.371	98.4954	70.7088	8.06108	6.32932	18.3261	13.4817	43.4658	-0.617084	0.140268	-0.245687	0.577705	-0.0396593	0.834817	-0.31989	0.250918	-1.01068	0.0232976
CD248	56.169	34.6556	5.54476	7.00163	20.2521	102.409	33.5727	6.93343	196.411	1.46066	116.768	1.25689	6.78843	7.32482	16.1321	9.46562	9.77383	46.2309	9.62312	0.794481	3.35878	3.16466	14.9941	2.59263	14.4886	0.131813	0.761354	-0.221174	0.491973	-0.00568366	1	-1.87618	0.0182239	-0.315023	0.255495
CDCA7	125.554	54.971	155.253	135.948	38.8164	30.5048	41.9658	75.1121	101.021	18.9886	59.3321	38.9635	145.103	45.1697	92.2758	112.727	39.0953	21.4644	149.441	193.853	12.7634	28.4819	44.9823	43.5562	123.153	-1.09167	0.0152135	-0.0407861	1	-0.102447	0.49814	-0.153232	0.582707	-1.331	0.00123021
CDH2	69.3853	43.0208	3.16843	1.16694	27.0027	126.377	8.39317	3.46671	33.3143	2.19099	12.3794	2.51377	0.848554	3.66241	0	2.58153	48.8691	74.2997	5.09459	6.75309	2.01527	4.74699	1.66601	0	5.43322	-0.198218	0.550932	-0.569273	0.0966177	-0.00398618	1	-1.49516	0.0313487	-0.603746	0.0698133
CHN1	29.7365	10.7552	10.2974	14.0033	15.189	19.6102	8.39317	8.089	410.197	1.46066	245.693	0	13.1526	9.76643	15.4869	17.2102	48.8691	36.3243	14.1516	17.4786	4.03054	6.32932	6.66405	0.518526	5.43322	-0.224103	0.603695	-1.48129	0.0157445	-0.0249348	0.97378	-2.005	0.0116238	-0.588156	0.0902251
CIB2	13.2162	13.1452	12.6737	9.91898	15.189	2.17891	16.7863	16.178	97.7859	16.7976	37.5844	28.9084	19.5167	8.54562	17.4227	31.8389	48.8691	36.3243	19.2462	5.16413	6.04581	1.58233	8.33006	9.33347	14.4886	-0.165028	0.76197	-2.17445	0.00369936	-0.0299539	0.97378	-0.478622	0.147392	-0.218848	0.534184
CLDN11	49.5609	27.4855	1.58422	2.91735	32.0658	74.083	20.9829	3.46671	17.7357	1.46066	19.6287	1.25689	1.69711	1.2208	3.22643	0.860511	19.5477	24.7666	0.566066	0.794481	2.01527	1.58233	4.99804	1.03705	3.62215	0.295053	NA	-0.198493	0.588178	0.00425036	1	-1.69456	0.0229649	-0.331774	0.230721
CLIP3	26.4325	16.7303	13.4658	11.0859	13.5014	15.2524	8.39317	21.9559	712.782	7.30329	258.407	17.5964	10.1827	7.32482	14.8416	12.0472	29.3215	33.0221	15.2838	15.4924	0.671757	3.16466	13.3281	6.22231	10.8664	-0.195992	0.671883	-1.05048	0.0299966	-0.0105221	1	-2.39791	0.00545791	-0.545882	0.106353
CLMP	23.1284	11.9502	0.792109	0.583469	6.75069	80.6198	4.19658	2.31114	181.431	0	105.839	0	0	4.88321	1.29057	0.860511	29.3215	44.5798	0.566066	0.794481	0.671757	0	0	0	0	-0.0388544	0.922635	-3.02127	0.012294	-0.0109351	1	-4.11671	0.000729591	-0.711389	0.0493013
CNKSR2	13.2162	23.9004	30.8922	25.0892	18.5644	4.35782	16.7863	12.7113	80.2899	1.46066	33.904	10.0551	17.3954	21.9745	5.16228	17.2102	0	1.6511	30.5675	45.6827	2.68703	3.16466	9.99607	4.14821	21.7329	-1.14048	0.0100443	0.0608641	1	-0.0585897	0.512116	-0.354833	0.221668	-1.41609	0.0064237
CNTNAP1	39.6487	37.0457	66.5371	66.5155	101.26	32.6837	151.077	63.5564	54.7649	119.774	67.9196	258.918	95.4624	48.8321	89.6947	60.2358	146.607	153.553	106.42	33.7654	17.4657	18.9879	66.6405	40.9636	50.7101	-0.24055	0.686696	-1.93224	0.00089051	-0.0237665	1	-0.596395	0.0765802	-0.110589	0.9453
COBLL1	13.2162	29.8756	53.8634	40.8429	16.8767	32.6837	41.9658	36.9783	84.1246	16.0672	106.173	23.8808	56.0046	36.6241	18.068	18.9312	58.643	18.1622	75.8528	326.929	16.1222	30.0642	11.6621	21.2596	36.2215	-1.40391	0.00413239	-0.147458	0.947776	-0.0072813	1	-0.0867196	0.775061	-0.165973	0.729221
COL16A1	56.169	25.0955	0.792109	0	8.43836	45.7572	4.19658	1.15557	923.933	2.19099	1987.18	0	0	0	1.93586	0	39.0953	13.2088	0.566066	0	0.671757	0	1.66601	0.518526	3.62215	0.148546	0.427916	-0.21117	0.3686	0.00232342	1	-1.64491	0.0208553	-0.242284	0.198767
COL1A2	2739.07	1172.32	16.6343	17.5041	646.378	3220.43	650.47	131.735	11423.9	11.6853	6798.32	8.7982	30.548	129.405	38.0719	13.7682	1114.22	1964.81	13.0195	8.34205	43.6642	96.5221	69.9725	25.4078	21.7329	0.289127	0.304011	-0.307211	0.248819	0.00166279	1	-2.36773	0.0113246	-0.332656	0.188442
COL27A1	33.0406	17.9253	6.33687	11.0859	11.8137	21.7891	4.19658	1.15557	530.872	2.92132	1492	6.28443	11.4555	8.54562	10.3246	8.60511	19.5477	3.30221	6.22672	6.75309	0	1.58233	4.99804	6.22231	9.05537	0.0878892	0.855164	-0.143842	0.769388	-0.00677503	1	-1.85097	0.0190007	-0.612762	0.0754225
COL3A1	502.217	231.834	3.16843	4.66776	126.575	555.623	88.1282	19.6447	18417.8	2.19099	11786.3	2.51377	14.0011	35.4033	1.93586	6.02358	302.989	378.103	5.09459	1.58896	10.0764	4.74699	1.66601	1.03705	5.43322	-0.0281386	0.949742	-2.72982	0.01246	-0.00923209	1	-4.27373	0.000351698	-1.98732	0.00875235
COL4A2	280.845	108.747	3.96054	0.583469	77.6329	254.933	83.9317	13.8669	2821.65	9.49428	4206.33	12.5689	4.24277	17.0912	9.67928	4.30255	97.7383	163.459	3.96246	1.19172	4.7023	20.5703	0	12.9632	1.81107	0.103682	0.732518	-0.155949	0.598229	-8.69e-05	1	-1.4324	0.032805	-0.163666	0.458799
COL5A1	363.447	164.913	61.7845	75.851	124.888	442.319	184.65	53.1563	3020.94	24.1009	2462.62	25.1377	55.156	30.5201	106.472	62.8173	195.477	320.314	53.2102	38.5323	9.4046	18.9879	108.291	14.5187	25.355	0.0987852	0.858937	-2.33267	0.00440237	-0.0114051	1	-3.6432	3.25e-05	-2.11542	0.00221247
COL5A3	26.4325	8.36515	36.437	32.6743	15.189	8.71565	4.19658	5.77786	129.063	4.38197	218.369	5.02754	240.565	13.4288	143.899	53.3517	19.5477	8.25552	60.003	34.1627	1.34351	9.49397	21.6582	6.74084	3.62215	-0.0575144	0.928819	-0.196737	0.650412	-0.0492311	0.555143	-1.31746	0.0282741	-0.454349	0.170791
COL6A3	1146.51	432.598	615.468	476.695	378.038	1135.21	302.154	88.979	5556.42	35.7861	4184.47	6.28443	238.868	144.055	214.88	224.593	518.013	630.722	658.334	582.355	55.7558	61.7108	234.908	42.5191	338.671	-0.36517	0.440792	-2.34711	0.000829071	-0.0233476	1	-3.03371	1.33e-05	-2.88636	2.29e-06
CORO2B	19.8244	16.7303	5.54476	3.50082	25.3151	23.968	12.5897	9.24457	184.906	9.49428	92.0093	32.679	8.90982	14.6496	7.74343	6.88409	9.77383	26.4177	6.22672	1.9862	6.04581	6.32932	8.33006	3.11116	3.62215	0.133505	0.793304	-0.227116	0.557957	-0.00757905	1	-1.17689	0.0358487	-0.134677	0.802413
CRMP1	23.1284	15.5353	0	6.41816	16.8767	56.6517	4.19658	3.46671	243.985	0	114.538	1.25689	2.12139	2.44161	12.2604	13.7682	9.77383	28.0688	2.26426	7.54757	1.34351	1.58233	3.33202	1.03705	5.43322	0.0161365	0.979008	-0.271165	0.304713	-0.010827	1	-2.56847	0.00810657	-0.272311	0.267521
CRYAB	23.1284	11.9502	0	0.583469	8.43836	37.0415	12.5897	6.93343	159.501	0	47.2872	0	0	1.2208	0	0	19.5477	42.9287	0	0	0	1.58233	0	0.518526	0	0.0513452	0.864437	-0.483493	0.138569	-5e-05	1	-1.59446	0.0262031	-0.211727	0.287419
CYP7B1	0	2.39004	3.96054	5.25123	5.06301	2.17891	4.19658	1.15557	67.2278	0.730329	54.5364	0	10.6069	2.44161	6.45286	12.0472	58.643	1.6511	10.7552	17.0813	0.671757	1.58233	0	3.62968	3.62215	-0.217708	NA	-2.0412	0.0182574	-0.0089774	1	-0.490856	0.160749	-0.0835946	0.935927
DAB2IP	19.8244	17.9253	10.2974	7.5851	23.6274	50.115	46.1624	4.62229	556.517	5.1123	369.71	7.54131	9.75837	14.6496	10.9699	12.9077	9.77383	21.4644	7.35885	24.2317	6.04581	3.16466	13.3281	13.4817	16.2997	-0.0544535	0.928819	-0.125658	0.932267	-0.00517459	1	-1.32693	0.0303225	-0.0902134	0.995137
DACH1	3.30406	1.19502	1.58422	1.16694	8.43836	13.0735	0	4.62229	223.493	2.92132	172.308	0	5.09133	4.88321	1.29057	3.44204	9.77383	16.511	3.96246	0	2.68703	0	1.66601	2.59263	1.81107	0.139628	0.681878	-0.510632	0.118852	-0.00247841	1	-1.72924	0.0239126	-0.0226415	1
DBN1	72.6893	76.4814	68.1213	69.4329	89.4466	124.198	25.1795	45.0673	828.663	56.2353	532.204	60.3305	88.6739	76.9106	163.903	76.5855	78.1906	67.6953	72.4564	34.9572	32.9161	9.49397	98.2947	44.0747	67.0097	0.395766	0.412268	-0.336022	0.393264	-0.0155512	1	-1.91238	0.00216224	-0.309972	0.37622
DDR2	82.6015	34.6556	5.54476	2.91735	20.2521	78.4408	29.3761	8.089	2596.48	1.46066	895	1.25689	4.24277	7.32482	0.645286	6.88409	39.0953	64.3931	8.49099	27.0124	2.68703	7.91164	1.66601	6.22231	5.43322	-0.251218	0.420245	-0.291496	0.28271	-0.00187638	1	-1.22555	0.0441151	-0.350475	0.179984
DENND2A	6.60812	2.39004	2.37633	0	1.68767	32.6837	20.9829	6.93343	695.406	4.38197	321.865	10.0551	1.69711	0	3.87171	5.16306	9.77383	19.8133	1.13213	1.58896	1.34351	0	28.3222	1.03705	3.62215	0.115805	0.725824	-0.225315	0.36308	-0.00136557	1	-1.39366	0.0354552	-0.00892971	1
DENND5B	16.5203	78.8715	99.8057	81.1023	60.7562	78.4408	96.5214	86.6679	206.357	33.5951	114.872	119.404	79.3398	53.7153	56.7851	140.263	107.512	74.2997	161.329	378.173	30.9008	23.7349	56.6444	42.5191	43.4658	-1.48876	0.00147157	-0.59362	0.0821655	-0.0788051	0.6289	-0.817041	0.0290077	-0.305524	0.381318
DKK3	135.466	59.7511	0	1.16694	25.3151	145.987	20.9829	8.089	264.597	0.730329	155.914	0	0.424277	3.66241	1.29057	0	87.9644	87.5085	0.566066	1.19172	1.34351	1.58233	4.99804	0	0	0.0667137	0.848898	-0.770006	0.0754236	-1.22e-05	1	-3.1551	0.00449861	-0.69734	0.0501132
DLG3	33.0406	27.4855	41.9818	35.0082	15.189	13.0735	12.5897	17.3336	216.543	20.4492	120.56	8.7982	58.126	12.208	56.7851	50.7701	9.77383	9.90663	39.0585	43.6965	2.01527	12.6586	16.6601	13.4817	30.7882	-0.413967	0.380033	-0.0891653	1	-0.0733026	0.491772	-0.862582	0.0420661	-1.12128	0.0138673
DNAH8	9.91218	8.36515	99.0136	50.7618	8.43836	0	29.3761	16.178	3.59507	8.03362	2.45358	3.77066	39.4578	2.44161	3.87171	1.72102	0	11.5577	97.3633	206.168	0	1.58233	3.33202	1.55558	5.43322	-6.41708	0.000678669	-0.218413	0.416858	-0.00669008	1	-0.303136	0.274827	-2.52726	0.00312083
DNAJB1	1265.46	1405.35	636.855	592.222	697.008	1170.08	302.154	284.271	456.813	405.333	498.969	795.609	375.91	266.135	1031.17	1199.55	254.119	315.361	246.239	162.074	338.566	221.526	261.564	250.967	237.251	0.529529	0.265388	0.0255928	1	-0.0390637	1	-0.645643	0.0601314	-1.18528	0.00570891
DTX3	19.8244	4.78009	38.0212	23.3388	55.6932	8.71565	8.39317	11.5557	151.832	16.0672	95.4667	6.28443	61.9445	12.208	45.17	13.7682	0	16.511	52.078	56.4081	1.34351	1.58233	16.6601	9.852	14.4886	-0.265445	0.589025	-0.350363	0.25565	-0.0159991	1	-2.97944	0.000260198	-0.449394	0.183952
DUSP16	198.244	301.146	459.423	404.344	258.214	122.019	83.9317	108.624	247.221	104.437	218.703	98.0371	277.477	137.951	278.118	462.955	39.0953	66.0442	379.83	301.108	51.7253	71.2048	143.277	100.076	273.472	-0.4135	0.423741	0.082004	1	-0.0839737	0.609651	-0.39232	0.167932	-1.3218	0.00124763
DZIP1	19.8244	8.36515	1.58422	0.583469	3.37534	19.6102	0	2.31114	341.532	1.46066	163.944	1.25689	1.69711	1.2208	0	1.72102	0	3.30221	1.13213	0.39724	0	0	0	1.03705	0	0.0107766	0.98143	-0.0974418	0.818455	-0.00228947	1	-1.7212	0.0218021	-0.40432	0.100306
EBF1	16.5203	34.6556	56.2397	34.4247	35.4411	19.6102	67.1453	43.9117	128.224	24.8312	107.177	114.377	73.8242	42.7281	33.5549	45.6071	136.834	57.7887	106.986	114.405	28.8855	6.32932	24.9902	15.0373	28.9772	-1.31578	0.00393042	-1.91715	0.000866723	-0.111353	0.392605	-0.567232	0.0825565	-0.38921	0.267604
EBF4	36.3447	41.8258	30.1001	43.1767	60.7562	8.71565	12.5897	23.1114	180.233	35.0558	107.065	20.1102	33.0936	13.4288	74.8531	18.0707	9.77383	77.6019	33.9639	13.9034	2.01527	4.74699	6.66405	44.0747	16.2997	0.113359	0.829688	-0.502946	0.118691	-0.00449006	1	-1.77251	0.0163675	-0.504266	0.130929
EDIL3	36.3447	4.78009	4.75265	4.08429	13.5014	37.0415	0	2.31114	100.063	1.46066	74.3882	1.25689	1.69711	4.88321	3.22643	0.860511	9.77383	8.25552	4.52853	2.38344	1.34351	1.58233	4.99804	3.11116	3.62215	0.242686	NA	-0.115995	0.898846	0.00357183	1	-1.53531	0.0286388	-0.17769	0.55146
EFEMP2	39.6487	37.0457	19.0106	28.0065	74.2575	52.2939	67.1453	31.2004	397.734	52.5837	205.878	47.7617	31.3965	21.9745	29.6831	8.60511	9.77383	74.2997	20.3784	8.34205	13.4351	7.91164	49.9804	21.7781	16.2997	0.284003	0.528347	-0.274223	0.465753	0.000894302	1	-1.8519	0.00913171	-0.132759	0.833709
EFNB2	29.7365	21.5104	7.92109	9.91898	15.189	41.3993	33.5727	2.31114	177.357	4.38197	139.408	2.51377	10.1827	6.10402	6.45286	10.3261	19.5477	21.4644	7.92492	5.16413	2.68703	0	4.99804	4.66673	10.8664	-0.0696194	0.902492	-0.348271	0.22601	-0.00866657	1	-2.29147	0.00827018	-0.562022	0.0947418
EHD2	66.0812	56.166	0.792109	4.66776	40.5041	174.313	29.3761	6.93343	1773.09	6.57296	861.765	6.28443	1.69711	9.76643	12.2604	6.02358	48.8691	69.3464	2.26426	1.58896	4.03054	0	16.6601	3.62968	3.62215	0.289623	0.310092	-0.380813	0.179033	-0.00309627	1	-3.43179	0.00167098	-0.340696	0.186691
ELN	19.8244	10.7552	0.792109	0	11.8137	43.5782	4.19658	2.31114	2244.16	0	1134.11	1.25689	0.424277	0	1.29057	0	19.5477	14.8599	0	0	1.34351	0	0	0	0	0.116994	0.540148	-0.186829	0.416368	0.000269615	1	-2.08924	0.0120208	-0.136836	0.437575
ENAH	56.169	39.4357	0	0.583469	25.3151	74.083	12.5897	5.77786	1897.6	4.38197	1028.16	3.77066	0.848554	6.10402	5.16228	0.860511	9.77383	79.253	1.6982	0	3.35878	7.91164	0	0	7.24429	0.0219794	0.968403	-0.426109	0.151887	-0.00827662	1	-3.47477	0.000843705	-0.528387	0.0857705
EPS8L2	19.8244	19.1204	15.0501	18.0876	40.5041	17.4313	8.39317	8.089	137.571	14.6066	306.698	17.5964	25.4566	10.9872	25.8114	27.5363	29.3215	23.1155	17.548	22.2455	2.68703	4.74699	23.3242	29.0375	9.05537	0.185438	0.718842	-0.288166	0.397333	-0.00222032	1	-1.06578	0.040083	-0.126153	0.85763
FAT1	214.764	82.4565	11.0895	12.8363	59.0685	296.332	62.9487	11.5557	783.965	5.84263	622.987	6.28443	5.5156	13.4288	6.45286	26.6758	87.9644	146.948	2.83033	14.6979	2.68703	11.0763	16.6601	14.0002	19.9218	0.124326	0.76556	-0.362211	0.201262	-0.00319967	1	-2.07231	0.0144766	-0.565841	0.08518
FBLN1	69.3853	53.776	0.792109	2.91735	30.3781	76.2619	29.3761	2.31114	735.671	13.1459	583.841	2.51377	3.39422	18.312	5.80757	3.44204	29.3215	46.2309	2.83033	0	3.35878	1.58233	8.33006	4.14821	3.62215	0.242406	0.380789	-0.192462	0.516093	-0.00254487	1	-1.25739	0.0430264	-0.213327	0.383674
FBLN5	52.865	38.2407	6.33687	4.08429	21.9397	45.7572	12.5897	4.62229	414.631	0	171.416	0	3.81849	8.54562	4.517	2.58153	48.8691	39.6265	2.83033	3.57516	2.01527	4.74699	0	1.03705	1.81107	-0.116122	0.806931	-2.47183	0.00539583	-0.0137109	1	-3.48473	0.000265646	-2.96298	0.00127768
FBN1	469.177	200.764	34.0607	30.3404	126.575	507.687	138.487	39.2894	1368.28	15.3369	970.949	13.8257	25.4566	45.1697	21.9397	18.0707	205.25	340.128	48.1156	41.7102	22.168	18.9879	51.6464	42.0006	36.2215	0.114523	0.825128	-0.402815	0.187497	0.00335961	1	-2.0783	0.00986307	-0.450728	0.159421
FGD1	9.91218	0	0	0	8.43836	19.6102	8.39317	1.15557	289.763	2.19099	119.779	2.51377	2.12139	0	2.58114	3.44204	9.77383	3.30221	0	0	0	0	1.66601	1.03705	0	0.146432	0.423075	-0.129419	0.603139	-0.00222835	1	-1.48304	0.0218545	-0.0495982	1
FGF2	52.865	31.0706	3.16843	2.33388	21.9397	84.9776	12.5897	1.15557	101.141	0.730329	38.9227	1.25689	2.12139	2.44161	5.16228	3.44204	19.5477	44.5798	2.83033	3.17792	1.34351	3.16466	14.9941	1.55558	5.43322	0.21759	0.504117	-0.228763	0.426737	0.00028603	1	-1.1714	0.0473037	-0.259187	0.318807
FKBP10	115.642	43.0208	1.58422	0.583469	27.0027	135.093	33.5727	8.089	523.682	0.730329	231.306	1.25689	1.27283	9.76643	0.645286	1.72102	78.1906	85.8574	2.26426	0	0.671757	0	6.66405	0	0	0.0308094	0.931979	-2.04805	0.0291017	-0.00753472	1	-3.94437	0.00159367	-0.919057	0.0340744
FLNC	194.94	77.6764	0.792109	0.583469	42.1918	206.997	37.7692	13.8669	531.471	0.730329	187.699	0	0.848554	4.88321	0	0	87.9644	145.297	0	0.794481	1.34351	3.16466	1.66601	0	0	-0.0275744	0.948504	-3.70215	0.00416003	-0.00222749	1	-4.28055	0.000168876	-3.85315	0.00129985
FRAS1	23.1284	0	0.792109	1.16694	3.37534	37.0415	8.39317	4.62229	190.299	0.730329	185.692	1.25689	2.96994	0	0.645286	1.72102	9.77383	14.8599	5.09459	0	0	0	0	0.518526	0	-0.0216844	0.95252	-0.844607	0.0889884	-0.00212515	1	-4.10963	0.00175125	-0.176783	0.331662
FRMD6	125.554	33.4606	3.96054	4.66776	11.8137	80.6198	25.1795	5.77786	310.973	0	131.49	6.28443	3.81849	2.44161	3.87171	3.44204	48.8691	80.9041	5.09459	4.36965	5.37406	4.74699	0	3.62968	0	-0.0197578	0.971884	-0.475348	0.129219	-0.000763731	1	-2.43018	0.00989934	-0.589945	0.0719372
FSCN1	1979.13	2361.36	1246.78	1124.93	2408.31	2048.18	1082.72	828.545	1972.97	1363.52	1382.71	869.765	1172.28	844.796	2325.61	3212.29	1231.5	1122.75	1261.19	584.341	392.978	335.454	1016.27	481.192	816.794	0.0688663	0.929234	-0.352562	0.404535	-0.150618	0.255943	-1.45955	0.00519315	-1.01683	0.0168918
FSTL1	389.879	161.328	1.58422	5.25123	119.825	446.677	100.718	23.1114	1867.52	0.730329	899.126	0	1.69711	28.0785	6.45286	2.58153	205.25	333.523	1.13213	1.58896	10.0764	14.241	1.66601	2.0741	0	0.14576	0.694799	-1.50546	0.0199709	-0.00497602	1	-3.91567	0.000211895	-1.26188	0.0180182
FUBP1	548.474	548.515	651.905	591.638	381.414	472.824	604.308	611.297	425.416	284.828	382.647	340.616	483.252	489.542	333.613	554.169	312.762	430.938	625.503	719.8	427.909	420.899	319.874	444.377	454.579	-1.1006	0.000465941	0.0658037	1	-0.0142858	1	0.00273611	0.994423	-0.394872	0.0402157
GDF11	26.4325	26.2905	41.9818	36.1751	28.6904	41.3993	20.9829	20.8003	307.978	9.49428	138.85	37.7066	33.0936	18.312	26.4567	49.0491	48.8691	49.5331	47.5495	32.1765	5.37406	11.0763	18.3261	8.81494	47.0879	-0.560486	0.23852	-2.05847	0.000950237	-0.119014	0.345405	-1.9612	0.000705301	-1.14189	0.00874573
GJC1	16.5203	8.36515	5.54476	5.25123	3.37534	30.5048	0	2.31114	247.94	2.92132	229.41	0	2.54566	2.44161	3.87171	6.02358	0	23.1155	3.96246	5.56137	2.68703	0	0	0.518526	0	-0.0531358	0.899195	-0.287971	0.260457	-0.00742423	1	-2.00749	0.0182189	-0.446809	0.0976046
GLCCI1	118.946	158.938	202.78	173.874	135.014	67.5463	75.5385	98.2236	62.0749	34.3255	60.2243	50.2754	131.102	92.781	85.1777	121.332	58.643	54.4865	193.028	409.555	48.3665	53.7992	74.9705	57.5564	90.5537	-1.10595	0.0143846	0.0205379	1	-0.0163561	1	-0.149233	0.593627	-0.937761	0.0150791
GNG11	59.4731	35.8507	11.0895	15.7537	20.2521	80.6198	20.9829	23.1114	274.783	27.0222	169.409	20.1102	16.1225	15.8704	30.3284	44.7466	19.5477	41.2776	14.1516	5.56137	10.7481	7.91164	23.3242	6.74084	19.9218	0.152114	0.76556	-0.20384	0.659291	-0.0139804	1	-1.11047	0.0401589	-0.250763	0.438591
GNG4	52.865	16.7303	162.382	130.697	32.0658	21.7891	8.39317	31.2004	6.59096	0	6.02243	2.51377	81.4612	10.9872	51.6228	143.705	0	8.25552	131.327	154.924	0	9.49397	11.6621	5.70379	21.7329	-0.437856	0.160912	-0.0166539	1	-0.0217876	1	-0.30934	0.268649	-1.16138	0.0199396
GPC1	89.2096	32.2656	15.0501	10.5025	40.5041	61.0095	4.19658	8.089	92.3933	26.2918	85.2062	3.77066	10.1827	6.10402	18.7133	12.9077	68.4168	54.4865	14.7177	7.94481	3.35878	9.49397	8.33006	6.22231	1.81107	0.217975	0.626248	-0.754454	0.0523779	-0.00209707	1	-2.23393	0.00708882	-0.789451	0.0503
GPR176	26.4325	11.9502	0	0	10.126	69.7252	8.39317	4.62229	92.5131	3.65164	48.4025	1.25689	1.27283	2.44161	5.80757	6.02358	0	29.7199	1.6982	0.794481	1.34351	1.58233	0	5.18526	0	0.0707113	NA	-0.112488	0.793863	-0.00234147	1	-1.08886	0.0493439	-0.09381	0.812263
HES4	75.9934	84.8466	15.0501	15.1702	111.386	37.0415	62.9487	39.2894	41.7028	403.142	45.5028	106.835	71.7028	40.2865	130.348	57.6542	48.8691	146.948	14.1516	2.78068	12.7634	17.4056	28.3222	14.0002	3.62215	0.340106	0.412183	-0.429835	0.175408	-0.0343071	0.817078	-1.16822	0.0343496	-0.237418	0.483707
HIST1H2BM	337.014	154.158	414.273	306.905	114.762	180.85	50.359	121.335	294.915	67.1903	194.391	77.9269	274.083	94.0018	222.624	418.208	68.4168	82.5552	356.621	398.829	58.4429	64.8755	86.6326	280.004	181.107	-0.346951	0.524908	-0.0446175	1	-0.00933743	1	-0.314663	0.248761	-1.16273	0.00390444
HMCN1	13.2162	3.58507	0.792109	2.91735	10.126	26.1469	12.5897	5.77786	621.228	2.92132	393.688	1.25689	0.848554	8.54562	0.645286	0.860511	58.643	11.5577	5.09459	4.36965	2.68703	1.58233	3.33202	1.03705	3.62215	-0.137077	0.736318	-0.613396	0.0845551	-0.002703	1	-2.69655	0.0055087	-0.118165	0.789803
HOXB3	6.60812	20.3154	40.3975	29.7569	33.7534	19.6102	29.3761	17.3336	202.402	12.4156	117.772	47.7617	20.3653	21.9745	21.2944	18.0707	9.77383	36.3243	27.1712	22.6427	0.671757	9.49397	33.3202	16.0743	19.9218	-0.152422	0.782415	-0.30186	0.361527	-0.011722	1	-1.09534	0.0364382	-0.186136	0.628265
HSPA1B	1169.64	1345.59	550.515	376.921	951.847	1006.66	209.829	236.892	59.4385	311.12	113.757	913.756	401.366	172.133	1284.76	643.662	195.477	470.565	110.949	49.6551	210.26	134.498	163.269	95.4088	88.7426	0.631057	0.129826	-0.0999473	1	-0.0264293	1	-0.687831	0.0721672	-1.16778	0.0125436
HSPG2	247.805	126.672	89.5083	64.7651	177.206	274.543	146.88	50.8451	1605.8	110.28	2235.66	148.313	70.43	108.651	85.1777	57.6542	136.834	189.877	95.6651	86.2012	19.481	25.3173	226.578	108.372	110.475	0.179561	0.729633	-0.254572	0.539454	-0.00086681	1	-1.00148	0.0433138	-0.16141	0.725677
HSPH1	1103.56	1416.1	1190.54	1162.85	715.573	812.734	297.957	526.941	238.713	409.715	385.435	681.232	497.677	267.356	1595.79	1548.06	342.084	404.521	357.754	394.46	368.123	379.759	311.544	237.485	318.749	0.267176	0.653364	-0.0142444	1	-0.0475042	0.932139	-0.280179	0.298957	-1.22696	0.0031308
HTRA1	148.683	39.4357	2.37633	0	13.5014	98.0511	37.7692	6.93343	180.592	0	115.764	0	0	7.32482	0	1.72102	29.3215	52.8354	0	0.794481	5.37406	3.16466	1.66601	0	1.81107	-0.0152262	0.975296	-0.268147	0.31208	-0.00609516	1	-1.52216	0.0311233	-0.725965	0.049616
HTRA3	23.1284	28.6805	9.5053	9.91898	37.1288	23.968	16.7863	3.46671	258.246	3.65164	73.719	12.5689	14.4254	13.4288	18.7133	7.7446	19.5477	18.1622	9.62312	15.8896	0.671757	1.58233	9.99607	7.77789	5.43322	0.00530682	0.995251	-0.250705	0.416368	-0.00850573	1	-2.3839	0.00708882	-0.413536	0.172003
IFI44L	1450.48	2618.29	1593.72	972.644	2339.11	2281.32	2337.5	2455.59	851.552	863.979	1835.61	1410.23	1546.07	2386.67	1320.9	1622.06	1446.53	2118.37	1830.66	494.167	765.803	789.582	453.155	528.378	340.482	-0.63081	0.188885	-0.485296	0.18757	-0.767144	0.0182681	-1.15876	0.00327994	-1.01165	0.0064237
IFITM1	62.7772	192.399	268.525	163.371	128.263	89.3354	62.9487	70.4899	118.038	259.997	348.52	265.203	358.938	94.0018	414.273	443.163	48.8691	249.317	267.749	107.255	8.73284	15.8233	38.3183	96.4458	85.1204	-0.369319	0.416928	-1.01902	0.0206501	-0.366454	0.0511896	-1.19641	0.0239126	-1.31705	0.00713118
IFITM3	3584.91	3783.44	948.154	968.559	2334.05	6229.51	2522.15	1670.96	3028.49	4224.22	4027.78	3252.82	2027.2	2094.9	3567.14	3079.77	1299.92	2686.35	950.424	262.179	819.543	1041.17	864.66	1491.8	603.087	0.367479	0.449253	-0.149508	0.989134	-0.0286803	1	-1.06469	0.0232845	-0.269457	0.449291
IGFBP3	370.055	143.403	0	0.583469	91.1343	422.709	88.1282	26.5781	300.668	0	69.0349	0	0	18.312	1.29057	0	146.607	219.597	0	0	4.03054	7.91164	0	0	0	0.104095	0.746876	-3.90743	0.00159518	-0.00969288	1	-4.73843	1.16e-05	-4.30968	0.000202647
IGHA1	9.91218	83.6515	1764.82	1641.3	204.208	26.1469	41.9658	31.2004	0.479343	27.0222	48.7371	70.3856	1867.24	90.3394	144.544	112.727	9.77383	16.511	4213.79	1311.29	8.06108	1.58233	48.3144	18.6669	25.355	-0.439287	0.096963	-0.0898754	0.958377	-0.0123757	1	-0.609696	0.119825	-2.80446	0.00390598
IGHA2	0	11.9502	224.959	215.3	18.5644	0	8.39317	4.62229	0.119836	6.57296	7.24922	8.7982	293.6	2.44161	18.7133	23.2338	0	4.95331	256.428	168.033	1.34351	0	6.66405	0.518526	0	-0.571193	0.0581293	-0.161494	0.567737	-0.0114813	1	-0.718951	0.0983583	-3.70513	0.00110181
IGHE	9.91218	8.36515	80.003	79.3518	10.126	0	8.39317	1.15557	0	0	0	0	44.9734	6.10402	20.0039	19.7917	0	1.6511	105.854	129.5	0	0	0	0	1.81107	-0.447247	0.0692506	-0.0930909	0.804166	-0.0843306	0.461621	-0.35069	0.199949	-3.38564	0.00614609
IGHG1	29.7365	136.233	2864.26	2277.86	50.6301	0	4.19658	30.0449	10.3059	0	708.639	5.02754	145.527	81.7938	91.6306	55.9332	0	0	2663.34	33561.3	0	9.49397	79.9686	92.8162	21.7329	-1.07011	0.0240166	0.104699	0.731214	-0.00403787	1	-0.0240007	0.93431	-0.474494	0.0831282
IGHG2	26.4325	34.6556	1339.46	1618.54	45.5671	2.17891	0	4.62229	1.43803	0	36.2461	2.51377	49.6404	10.9872	29.6831	24.0943	0	1.6511	661.731	6583.86	0.671757	0	31.6542	21.7781	0	-0.767549	0.0315084	-0.0279981	1	-0.00457887	1	-0.466166	0.162572	-4.92026	0.000622825
IGHG3	9.91218	10.7552	691.511	491.865	30.3781	0	0	20.8003	3.95458	2.19099	93.5707	1.25689	269.416	1.2208	58.0757	115.308	0	6.60442	328.318	5444.58	2.01527	1.58233	4.99804	5.70379	0	-0.547301	0.0526466	-0.0842618	0.91125	-0.00440803	1	-0.645559	0.103955	-1.07566	0.0264908
IGHV1-2	6.60812	21.5104	382.588	279.482	37.1288	15.2524	50.359	24.267	2.03721	17.5279	157.921	72.8994	138.314	39.0657	34.2001	40.444	0	3.30221	328.318	1769.71	8.73284	0	34.9863	26.9634	28.9772	-1.68619	0.00795828	0.05366	1	-0.00956717	1	-0.135672	0.576483	-0.392733	0.168143
IGHV3-74	0	1.19502	14.258	25.0892	3.37534	6.53674	8.39317	1.15557	0.958685	2.92132	8.92212	13.8257	17.3954	2.44161	4.517	18.0707	0	1.6511	546.819	142.212	2.68703	0	3.33202	2.59263	7.24429	-1.04829	0.0182069	-0.0211965	1	-0.00442484	1	-0.075447	0.764411	-0.078624	0.993841
IGHV4-59	0	5.97511	57.8239	70.5998	3.37534	0	12.5897	6.93343	0.479343	18.9886	15.2791	21.3671	77.6427	10.9872	15.4869	15.4892	0	0	132.459	3234.33	3.35878	0	29.9882	6.74084	0	-8.3249	0.000418929	0.0427179	1	-0.0101224	1	-0.0184387	0.952973	-0.147833	0.636674
IGKV1-17	0	8.36515	26.1396	25.6727	6.75069	8.71565	8.39317	9.24457	0.119836	0	4.79564	6.28443	10.6069	3.66241	5.80757	8.60511	0	3.30221	19.2462	273.699	0.671757	1.58233	4.99804	4.14821	0	-1.08075	0.0143846	-0.0371324	1	-0.00635401	1	-0.208386	0.400662	-0.265205	0.33431
IGKV1-6	0	1.19502	10.2974	9.33551	3.37534	0	0	1.15557	0	0	0.446106	5.02754	2.96994	2.44161	0	5.16306	0	1.6511	39.0585	1303.35	0.671757	0	1.66601	2.0741	0	-6.71095	0.00276149	-0.047933	1	-0.00221622	1	0.00218313	0.994293	-0.0796265	0.911558
IGKV3-11	9.91218	48.9959	155.253	193.128	20.2521	28.3259	54.5556	30.0449	0.838849	4.38197	3.23427	40.2203	34.7907	20.7537	12.2604	43.0255	0	9.90663	546.253	2300.42	9.4046	7.91164	16.6601	11.4076	9.05537	-7.45937	2.11e-06	0.0606961	1	-0.00865904	1	-0.0582124	0.850358	-0.871439	0.0407714
IGLC3	26.4325	126.672	692.303	424.766	77.6329	32.6837	25.1795	33.5116	2.51655	10.2246	71.9346	50.2754	115.828	87.8978	36.7813	82.609	0	8.25552	1032.5	6339.96	12.7634	6.32932	51.6464	39.9265	41.6547	-4.84801	0.00130158	0.0996947	0.951088	-0.00906124	1	-0.0810076	0.76179	-0.968512	0.0303317
IGLV2-14	13.2162	27.4855	101.39	86.937	15.189	28.3259	20.9829	19.6447	0.359507	5.84263	28.3277	28.9084	42.0034	39.0657	31.619	43.0255	0	6.60442	211.709	3632.37	9.4046	1.58233	26.6562	12.4446	12.6775	-5.86883	0.000678669	0.0923105	0.980571	-0.0115141	1	-0.00712263	0.984412	-0.187772	0.554055
IL6	287.453	127.867	200.403	150.535	221.085	213.533	994.59	174.491	5.3926	540.443	40.1495	343.13	104.796	106.21	132.929	151.45	5111.71	260.875	91.7026	73.4895	32.9161	42.7229	61.6424	204.299	173.863	-0.0255136	0.964066	-1.50152	0.0233851	-0.00291275	1	-0.0945423	0.702278	-0.0528174	1
INPP5A	79.2975	97.9918	64.9529	44.9271	199.145	135.093	79.7351	70.4899	261.841	82.5272	107.623	94.2664	82.3098	90.3394	72.9173	51.6306	48.8691	133.739	64.5315	49.2578	38.9619	25.3173	73.3045	65.8528	72.4429	0.209622	0.739496	-0.282512	0.61508	-0.00384526	1	-1.05059	0.0138922	-0.111056	0.942024
IRS1	23.1284	38.2407	31.6843	37.342	28.6904	19.6102	4.19658	5.77786	472.392	5.1123	213.35	13.8257	65.3387	8.54562	32.9096	42.165	68.4168	16.511	37.9264	44.8882	2.01527	1.58233	21.6582	4.66673	23.544	-0.195653	0.683831	-1.75449	0.0100625	-0.0259	0.994776	-2.45392	0.00433272	-1.81331	0.00385689
ISG15	1189.46	1686.18	776.266	446.354	1944.2	1634.18	835.12	581.252	544.653	1939.75	1288.8	1264.43	1699.23	628.714	1634.51	1928.4	576.656	2641.77	540.593	129.898	243.848	205.703	368.189	240.596	309.694	0.104805	0.874063	-0.592389	0.08443	-0.105022	0.269553	-1.31564	0.019012	-0.649024	0.0905967
ITGA11	168.507	62.1412	3.96054	8.75204	40.5041	191.744	54.5556	13.8669	150.993	3.65164	60.4473	3.77066	4.24277	26.8577	1.93586	8.60511	78.1906	120.531	2.83033	3.9724	6.04581	14.241	6.66405	1.03705	1.81107	0.00591419	0.994546	-0.470764	0.130417	-0.0100632	1	-2.05019	0.013677	-0.755037	0.050421
ITGBL1	49.5609	10.7552	0	0	5.06301	58.8306	16.7863	1.15557	75.6163	0	9.03364	0	0	4.88321	0	0	78.1906	31.371	0.566066	0.39724	1.34351	0	0	0	1.81107	-0.0442175	NA	-0.565087	0.116296	-0.00270289	1	-1.3718	0.033918	-0.192488	0.326713
JAM2	16.5203	4.78009	6.33687	0.583469	8.43836	19.6102	4.19658	8.089	87.0007	1.46066	74.6112	11.312	2.54566	7.32482	2.58114	2.58153	0	14.8599	5.66066	5.95861	3.35878	0	1.66601	0.518526	0	-0.211627	NA	-0.205916	0.462896	-0.00953461	1	-1.68766	0.0248961	-0.199366	0.406222
JCHAIN	29.7365	338.191	605.963	620.812	138.389	320.3	570.735	352.449	45.5375	118.313	231.864	280.286	302.934	175.796	170.355	305.481	430.048	229.504	654.372	3742.8	92.0307	129.751	113.289	110.446	190.163	-2.28989	0.00189068	-0.31029	0.387241	-0.0109103	1	-0.0744104	0.808371	-0.230809	0.515186
KIAA0408	36.3447	19.1204	8.71319	7.00163	10.126	2.17891	0	2.31114	171.724	0	92.9015	1.25689	10.6069	6.10402	5.80757	5.16306	0	14.8599	18.1141	15.8896	0.671757	3.16466	3.33202	0	1.81107	-0.270027	0.346215	-0.196035	0.477942	-0.0134578	1	-0.505006	0.155264	-1.17001	0.0216622
KIF26B	3.30406	13.1452	17.4264	19.838	16.8767	32.6837	4.19658	17.3336	725.365	5.1123	146.769	1.25689	16.9711	7.32482	10.9699	22.3733	19.5477	11.5577	18.6802	7.54757	6.71757	1.58233	11.6621	2.59263	23.544	-0.0409435	0.951192	-0.271006	0.389391	-0.0100181	1	-2.65187	0.00216224	-0.277574	0.37042
KLF12	158.595	308.316	247.93	204.798	199.145	176.492	151.077	195.292	424.098	58.4263	156.918	66.6149	173.529	311.305	118.733	214.267	146.607	107.322	293.788	359.9	156.519	139.245	146.609	53.9267	231.817	-1.01171	0.0265757	0.0307427	1	-0.103194	0.576833	-0.142065	0.614181	-0.619694	0.0792969
KRT7	16.5203	19.1204	10.2974	4.08429	21.9397	15.2524	16.7863	17.3336	333.982	43.0894	107.735	33.9359	22.4867	9.76643	81.9513	13.7682	9.77383	24.7666	7.35885	5.16413	5.37406	6.32932	11.6621	6.74084	5.43322	0.24722	0.566407	-0.190593	0.67753	-0.0154386	1	-2.2646	0.00599634	-0.115698	0.884485
LAMA3	16.5203	0	12.6737	11.0859	5.06301	2.17891	20.9829	40.445	40.9838	17.5279	79.1838	31.4221	5.09133	2.44161	3.87171	18.9312	39.0953	160.157	14.7177	6.35585	0	4.74699	0	18.6669	1.81107	-0.240981	0.423741	-5.13693	0.00163591	-0.00408241	1	-0.245219	0.341271	-0.126823	0.71543
LAMB1	125.554	53.776	1.58422	5.83469	27.0027	98.0511	25.1795	18.4891	1533.06	5.1123	1111.81	10.0551	4.24277	10.9872	7.09814	10.3261	19.5477	69.3464	14.1516	4.36965	2.01527	1.58233	9.99607	7.77789	18.1107	0.0220873	0.970689	-0.306091	0.261754	-0.00315776	1	-2.31853	0.0110592	-0.536883	0.089304
LBH	280.845	434.988	572.695	414.263	418.543	246.217	104.915	160.624	8060.14	219.099	1928.07	246.35	636.84	197.77	462.67	771.878	117.286	117.228	682.109	529.522	104.794	75.9518	161.603	212.077	275.283	-0.229008	0.692635	-0.148806	0.985964	-0.0462997	0.826131	-2.05856	0.00113754	-1.30793	0.00459652
LINC01184	75.9934	74.0914	122.777	99.1898	67.5069	50.115	146.88	91.2901	98.2652	29.2132	74.3882	54.0461	76.3699	78.1314	47.1058	63.6778	58.643	67.6953	114.345	204.182	84.6414	83.8634	71.6385	62.7417	90.5537	-1.10194	0.0116668	0.065725	1	-0.000927624	1	0.0613948	0.866438	-0.102648	0.966368
LINC01480	9.91218	11.9502	27.7238	23.9222	3.37534	0	33.5727	11.5557	2.99589	2.19099	4.34953	13.8257	22.911	14.6496	9.67928	26.6758	9.77383	11.5577	36.7943	42.5047	4.7023	1.58233	1.66601	9.33347	16.2997	-1.61345	0.00540262	-0.152693	0.829173	-0.0584477	0.428475	0.106003	0.677958	-0.290297	0.358113
LMCD1	26.4325	19.1204	33.2686	32.6743	18.5644	19.6102	0	13.8669	442.193	2.92132	228.072	6.28443	25.0324	21.9745	23.8756	23.2338	19.5477	24.7666	52.6441	45.6827	4.7023	3.16466	8.33006	5.70379	43.4658	-0.710243	0.099414	-0.967118	0.0239671	-0.126889	0.244851	-2.1261	0.00145894	-1.95197	0.00045875
LMO7	128.858	68.1163	60.9924	50.7618	72.5699	115.482	46.1624	34.6671	436.561	14.6066	437.184	16.3395	53.4589	42.7281	23.2303	43.0255	39.0953	120.531	59.4369	81.8315	12.0916	23.7349	24.9902	21.7781	38.0325	-0.410744	0.384838	-0.556396	0.102494	-0.0139234	1	-1.72971	0.00493796	-1.24283	0.00733389
LOXL2	62.7772	65.7262	24.5554	23.3388	38.8164	126.377	20.9829	12.7113	95.0297	16.0672	105.504	11.312	21.6381	3.66241	15.4869	8.60511	39.0953	59.4398	24.9069	20.6565	8.73284	7.91164	16.6601	3.62968	7.24429	0.0135523	0.988944	-0.568977	0.0949643	0.00243386	1	-2.64436	0.000360739	-1.40744	0.00545789
LRMP	145.379	282.025	370.707	278.315	192.395	244.038	339.923	288.893	65.0707	181.122	121.229	296.625	315.238	280.785	175.518	391.532	97.7383	277.386	491.911	730.525	231.084	113.928	149.941	200.67	202.84	-1.06043	0.0186559	0.0165629	1	-0.0155991	1	0.0575366	0.874067	-0.0827731	1
LRP6	29.7365	15.5353	17.4264	26.8396	20.2521	39.2204	4.19658	9.24457	490.248	10.9549	350.974	3.77066	11.4555	14.6496	10.3246	12.9077	58.643	19.8133	13.5856	17.8758	4.7023	0	16.6601	19.1855	25.355	0.112397	0.837788	-0.448676	0.149231	-0.00169029	1	-1.67767	0.017904	-0.280837	0.367243
LRRC15	39.6487	32.2656	0	0.583469	18.5644	89.3354	8.39317	3.46671	6.23145	0	2.34206	0	1.27283	4.88321	0	0	29.3215	37.9754	0	0	2.68703	1.58233	0	0	0	0.105237	NA	-0.285692	0.28271	-0.00104714	1	-1.31897	0.0401589	-0.315227	0.183952
MAGED1	175.115	156.548	127.529	126.613	94.5096	237.501	100.718	65.8676	1855.3	69.3812	666.148	72.8994	112.858	81.7938	81.306	127.356	185.703	138.693	136.988	216.893	61.8016	53.7992	83.3006	86.5939	105.042	-0.191566	0.749564	-0.368988	0.323261	-0.00515686	1	-1.03344	0.024497	-0.447486	0.206092
MAGI1	39.6487	14.3403	12.6737	13.4198	21.9397	28.3259	33.5727	6.93343	246.622	5.84263	200.971	6.28443	9.75837	14.6496	12.2604	6.88409	9.77383	13.2088	16.982	9.93101	1.34351	0	23.3242	2.59263	7.24429	-0.131919	0.788144	-0.254233	0.396534	-0.0150585	1	-2.83591	0.00245572	-0.859438	0.0407816
MAGI2	19.8244	2.39004	3.96054	7.00163	16.8767	23.968	8.39317	9.24457	133.737	4.38197	56.6554	2.51377	0.848554	2.44161	0.645286	2.58153	9.77383	3.30221	1.6982	3.9724	7.38933	1.58233	3.33202	5.18526	10.8664	0.130589	NA	-0.0330088	1	0.00830614	1	-1.08066	0.0461374	-0.0838231	1
MAGI3	26.4325	65.7262	57.8239	54.2627	72.5699	41.3993	88.1282	41.6006	343.089	57.696	254.838	10.0551	56.4289	59.8194	62.5927	50.7701	39.0953	62.742	52.078	42.902	20.1527	11.0763	63.3085	37.3339	47.0879	-0.146235	0.829838	-0.36004	0.352049	-0.0320045	1	-1.11861	0.01564	-0.299302	0.39737
MAP1B	419.616	192.399	6.33687	1.75041	96.1973	503.329	130.094	25.4226	1663.56	6.57296	653.434	2.51377	10.6069	18.312	4.517	15.4892	234.572	285.641	4.52853	21.0537	14.7787	6.32932	6.66405	1.55558	9.05537	-0.123858	0.753759	-1.09913	0.0362099	-0.0121206	1	-3.29666	0.0018122	-1.25972	0.0181506
MAP2	69.3853	35.8507	3.96054	3.50082	10.126	76.2619	12.5897	6.93343	298.75	2.92132	124.91	5.02754	3.39422	12.208	0.645286	10.3261	9.77383	82.5552	13.5856	9.93101	2.01527	1.58233	1.66601	0.518526	5.43322	-0.39147	0.165796	-0.998714	0.0445342	-0.03348	0.669208	-2.46537	0.00921545	-1.62208	0.0118955
MAP6	33.0406	8.36515	5.54476	5.25123	6.75069	32.6837	4.19658	3.46671	102.22	0.730329	40.7072	2.51377	5.09133	2.44161	7.09814	6.02358	19.5477	21.4644	7.35885	5.16413	0	0	0	0.518526	3.62215	-0.261542	NA	-3.72934	0.00527739	-0.0324921	0.695004	-3.82477	0.000727546	-3.47121	0.00221096
MARCKSL1	574.907	826.955	317.636	306.321	675.069	544.728	293.761	253.07	1594.17	331.569	726.372	356.956	482.403	385.774	637.542	763.273	244.346	340.128	315.299	172.402	162.565	125.004	254.9	223.485	271.661	0.177685	0.787559	-0.226306	0.816701	-0.121806	0.3793	-1.41696	0.00396087	-0.969506	0.0182195
MCAM	66.0812	20.3154	75.2503	58.9304	40.5041	19.6102	25.1795	6.93343	330.627	3.65164	466.627	0	37.7607	3.66241	50.3323	39.5835	19.5477	11.5577	70.7582	31.382	3.35878	3.16466	6.66405	16.0743	21.7329	-0.203745	0.716868	-0.389507	0.214808	-0.020839	1	-3.08558	2.55e-05	-2.73701	1.89e-05
MCC	52.865	38.2407	28.5159	28.0065	50.6301	115.482	41.9658	20.8003	352.556	26.2918	168.516	45.2479	21.2139	42.7281	20.6491	51.6306	39.0953	26.4177	43.5871	32.1765	10.7481	4.74699	33.3202	5.70379	43.4658	-0.246327	0.628626	-0.250943	0.552967	-0.0494709	0.640046	-2.28917	0.00216224	-0.551388	0.12997
MEIS2	3.30406	5.97511	1.58422	1.75041	3.37534	39.2204	8.39317	9.24457	85.4428	0	81.3028	0	0	3.66241	2.58114	1.72102	9.77383	16.511	0.566066	1.19172	3.35878	0	0	1.55558	1.81107	0.071061	NA	-0.215322	0.456641	-0.00341433	1	-1.80217	0.0215097	-0.0788032	0.980978
MEIS3	3.30406	9.56018	0	2.91735	6.75069	13.0735	4.19658	1.15557	181.072	14.6066	85.9869	5.02754	5.93988	3.66241	6.45286	5.16306	9.77383	29.7199	1.6982	0	0.671757	1.58233	0	1.03705	0	0.0393708	0.924125	-0.567436	0.109876	-0.0110722	1	-1.5754	0.0290077	-0.145958	0.549549
MEST	69.3853	52.581	36.437	21.5884	28.6904	89.3354	29.3761	9.24457	703.914	6.57296	285.173	11.312	13.5769	29.2993	16.1321	13.7682	19.5477	54.4865	40.1907	17.0813	43.6642	6.32932	8.33006	7.25936	14.4886	-0.000333568	1	-0.190412	0.714859	-0.00358292	1	-1.15063	0.0383516	-0.409489	0.196797
MET	42.9528	14.3403	6.33687	8.16857	10.126	32.6837	4.19658	6.93343	58.36	3.65164	58.2168	1.25689	2.96994	0	3.22643	8.60511	9.77383	18.1622	16.982	56.4081	0	0	1.66601	7.77789	3.62215	-0.233071	0.428402	-0.274606	0.28271	-1.84e-05	1	-1.62926	0.0272133	-0.978456	0.0300762
MEX3A	42.9528	15.5353	0.792109	2.33388	13.5014	19.6102	50.359	3.46671	396.296	3.65164	177.439	2.51377	5.09133	2.44161	4.517	4.30255	0	4.95331	3.39639	2.78068	1.34351	0	0	4.66673	0	-0.065559	0.854034	-0.0559492	1	-0.00429667	1	-2.26186	0.0129239	-0.262179	0.216517
MLLT11	66.0812	58.5561	23.7633	15.7537	37.1288	93.6932	134.291	138.669	104.856	13.1459	27.4355	15.0826	24.6081	17.0912	21.2944	26.6758	9.77383	46.2309	19.8123	19.0675	10.0764	11.0763	8.33006	21.7781	21.7329	-0.422304	0.35883	-0.164389	0.900509	-0.0146248	1	-1.73927	0.00568069	-0.538447	0.140986
MOXD1	19.8244	25.0955	7.92109	12.2529	8.43836	32.6837	8.39317	19.6447	348.602	2.92132	116.322	15.0826	10.1827	6.10402	6.45286	20.6523	29.3215	29.7199	8.49099	15.4924	2.01527	3.16466	1.66601	0	5.43322	-0.600399	0.0761742	-2.85027	0.00440237	-0.287706	0.0894672	-3.26436	0.000658924	-2.82984	0.00156221
MTCL1	33.0406	20.3154	54.6555	47.261	33.7534	28.3259	16.7863	4.62229	78.732	24.8312	73.0498	37.7066	63.2173	8.54562	32.9096	37.8625	48.8691	41.2776	57.7387	66.3392	4.03054	0	26.6562	14.5187	9.05537	-0.278838	0.589464	-2.83102	0.000616616	-0.0141743	1	-2.39245	0.00125457	-1.30848	0.00704721
MXRA5	85.9056	25.0955	0	0	28.6904	115.482	41.9658	12.7113	142.844	0	95.3551	5.02754	0	1.2208	0	1.72102	48.8691	37.9754	0.566066	0	1.34351	3.16466	1.66601	0	0	0.0280224	0.938685	-0.404399	0.162971	-0.00324923	1	-3.15557	0.0043383	-0.357342	0.14047
MXRA8	42.9528	23.9004	0.792109	0	11.8137	39.2204	12.5897	1.15557	258.366	2.19099	187.476	0	1.69711	2.44161	0	0	39.0953	47.882	0	0	1.34351	0	0	1.03705	1.81107	0.128744	0.616496	-0.842796	0.0624976	0.000581783	1	-1.96341	0.0190023	-0.366461	0.137753
MYO1B	135.466	45.4108	13.4658	11.0859	25.3151	100.23	54.5556	18.4891	1323.58	9.49428	701.167	16.3395	4.24277	12.208	6.45286	20.6523	58.643	52.8354	10.1892	10.7255	0.671757	3.16466	9.99607	19.704	10.8664	-0.0146705	0.982985	-0.406912	0.163253	-0.0038102	1	-2.67151	0.00617429	-0.785425	0.0468982
N4BP3	3.30406	7.17013	22.9711	14.0033	30.3781	15.2524	16.7863	6.93343	126.786	41.6287	107.958	67.8718	34.7907	3.66241	32.2643	31.8389	9.77383	11.5577	43.5871	23.4372	7.38933	4.74699	28.3222	12.9632	18.1107	0.0361115	0.968403	-0.198781	0.737224	-0.00414424	1	-1.74515	0.00556775	-0.000857849	1
NBL1	85.9056	45.4108	35.6449	22.1718	60.7562	143.808	104.915	42.7561	1021.84	125.617	723.361	67.8718	54.3075	34.1825	83.2418	106.703	117.286	44.5798	23.2087	25.8206	23.5115	25.3173	88.2986	22.8151	43.4658	0.237724	0.633308	-0.270127	0.501663	-0.0165393	1	-1.66571	0.0118614	-0.105922	0.94803
NBPF26	23.1284	39.4357	159.214	146.451	67.5069	41.3993	201.436	161.78	169.927	243.2	338.26	498.984	352.574	83.0146	383.945	166.939	87.9644	313.71	140.95	110.83	20.1527	42.7229	223.246	165.41	166.619	-0.211555	0.729735	-1.12776	0.00927785	-0.0551162	0.778323	-0.227883	0.394184	0.0467083	1
NCALD	95.8178	57.3611	137.035	114.36	79.3206	28.3259	33.5727	62.4009	259.804	38.7074	141.304	32.679	98.008	56.1569	68.4003	97.2377	19.5477	44.5798	153.404	98.5156	22.8397	22.1526	54.9784	23.3337	139.453	-0.845887	0.0655306	-0.260945	0.697972	-0.163516	0.337643	-0.585942	0.0603933	-1.33653	0.00045875
NCKAP1	59.4731	59.7511	19.8027	28.59	52.3178	128.556	8.39317	17.3336	561.07	12.4156	300.229	12.5689	19.941	20.7537	24.5209	23.2338	29.3215	39.6265	23.7748	29.793	17.4657	18.9879	23.3242	30.0745	23.544	0.314854	0.486755	-0.109462	1	0.0030164	1	-1.24919	0.023678	-0.185487	0.645673
NCOA3	875.576	1108.98	949.738	849.532	744.263	788.766	889.676	1090.86	475.148	411.906	467.519	693.801	645.75	866.77	517.519	974.098	733.037	693.464	969.67	1284.28	780.582	780.088	511.466	574.008	833.094	-1.09234	0.00316142	0.0799453	1	-0.0132847	1	0.104415	0.707434	-0.249303	0.322654
NDN	33.0406	8.36515	3.96054	3.50082	11.8137	28.3259	16.7863	19.6447	337.817	7.30329	160.375	11.312	9.3341	6.10402	16.7774	7.7446	29.3215	9.90663	7.35885	9.93101	2.01527	0	1.66601	6.74084	10.8664	-0.103063	0.836624	-0.301262	0.285727	-0.010287	1	-3.05855	0.00167816	-0.300018	0.278236
NEO1	56.169	25.0955	9.5053	8.75204	10.126	45.7572	4.19658	6.93343	298.031	7.30329	225.507	3.77066	6.36416	6.10402	1.93586	2.58153	9.77383	36.3243	11.8874	18.2731	0.671757	0	6.66405	5.70379	1.81107	-0.093572	0.822862	-0.277503	0.295383	-0.000433101	1	-1.51458	0.0311791	-0.551884	0.08154
NES	132.162	60.9461	8.71319	15.1702	60.7562	191.744	58.7522	5.77786	760.956	35.0558	504.88	21.3671	11.8798	7.32482	13.551	20.6523	48.8691	108.973	12.4534	25.4234	10.0764	3.16466	43.3163	6.74084	14.4886	0.106163	0.815715	-0.344772	0.221826	-0.00261437	1	-2.42366	0.008417	-0.419385	0.152095
NFATC4	23.1284	17.9253	15.0501	11.6694	32.0658	8.71565	20.9829	18.4891	271.787	34.3255	177.439	59.0736	26.3052	13.4288	23.2303	12.9077	48.8691	11.5577	29.4354	22.6427	5.37406	4.74699	16.6601	5.70379	1.81107	-0.200455	0.678766	-0.331554	0.281878	-0.0119172	1	-2.19213	0.00696947	-0.287882	0.356874
NKD1	6.60812	19.1204	23.7633	15.1702	20.2521	15.2524	0	8.089	1880.46	10.9549	796.187	8.7982	20.7896	20.7537	19.3586	24.9548	9.77383	8.25552	20.9444	9.53377	2.01527	7.91164	8.33006	4.66673	23.544	-0.0594916	0.918744	-0.116341	0.929434	-0.0237943	1	-1.33632	0.0322677	-0.342739	0.245761
NKX2-1	9.91218	3.58507	2.37633	0	6.75069	10.8946	4.19658	2.31114	98.5049	0	115.876	0	0	0	0	0	9.77383	4.95331	1.13213	0.39724	0	0	0	0	1.81107	-0.0846902	NA	-0.322901	0.221344	-0.000271243	1	-2.29657	0.0123605	-0.313761	0.153897
NOVA2	26.4325	11.9502	0	0	13.5014	23.968	8.39317	1.15557	162.377	0	142.642	2.51377	0	1.2208	0	0	19.5477	19.8133	0	0.39724	0	1.58233	0	0	0	-0.00757632	0.986617	-0.372569	0.187044	-0.00171956	1	-1.89029	0.0193474	-0.292585	0.171271
NREP	294.061	191.204	57.8239	44.3437	133.326	409.636	188.846	130.58	3065.52	54.7747	1003.07	54.0461	28.0023	84.2354	76.1437	102.401	263.893	165.11	54.9084	26.2179	96.733	63.2932	43.3163	40.445	94.1758	0.185944	0.738683	-0.315476	0.408434	-0.00888934	1	-2.00545	0.00425263	-0.320374	0.347522
NRSN2	33.0406	31.0706	23.7633	14.0033	37.1288	111.125	8.39317	15.0224	134.935	25.5615	81.8604	25.1377	19.0925	23.1953	19.3586	44.7466	29.3215	9.90663	28.8693	14.6979	11.4199	12.6586	14.9941	19.1855	23.544	0.174739	0.741169	-0.0248325	1	-0.00575897	1	-1.0021	0.0421086	-0.125274	0.86633
NT5DC2	82.6015	76.4814	101.39	68.2659	113.074	185.208	100.718	56.623	494.562	51.123	171.639	60.3305	77.6427	76.9106	72.9173	88.6326	97.7383	140.344	80.9474	149.76	20.1527	18.9879	86.6326	48.2229	36.2215	-0.290814	0.602285	-0.832088	0.0268968	-0.0321465	1	-2.23632	0.000259197	-0.505272	0.164715
NT5E	99.1218	63.3362	5.54476	7.5851	28.6904	67.5463	4.19658	6.93343	37.5086	0.730329	42.7146	6.28443	2.96994	20.7537	7.74343	12.9077	39.0953	44.5798	13.0195	8.34205	4.7023	3.16466	4.99804	1.55558	10.8664	-0.131561	0.789513	-0.352513	0.246556	-0.0177074	1	-0.755216	0.0812822	-1.15973	0.0186863
NXN	95.8178	97.9918	77.6266	67.6825	151.89	117.661	88.1282	36.9783	397.495	40.1681	192.16	99.294	58.9745	84.2354	114.216	54.2122	19.5477	84.2063	40.1907	34.9572	6.71757	3.16466	71.6385	94.3717	43.4658	0.194427	0.686257	-0.179371	0.777193	-0.00937775	1	-1.5447	0.0196954	-0.285918	0.37042
OCIAD2	39.6487	52.581	44.3581	38.509	27.0027	17.4313	0	20.8003	29.4796	5.1123	20.8554	12.5689	39.4578	21.9745	40.0077	77.446	48.8691	29.7199	67.9279	52.833	7.38933	9.49397	6.66405	13.4817	52.5211	-0.495926	0.25252	-0.36352	0.288992	-0.0499932	0.671971	-0.115622	0.677028	-1.18716	0.011677
P3H4	19.8244	9.56018	0	1.16694	20.2521	21.7891	0	2.31114	79.8105	2.92132	36.3576	5.02754	3.81849	1.2208	5.80757	0.860511	19.5477	19.8133	3.39639	3.57516	3.35878	1.58233	3.33202	0.518526	0	0.139153	NA	-0.263649	0.344849	0.00210579	1	-1.86438	0.0193474	-0.124129	0.751962
PALM	19.8244	14.3403	1.58422	2.91735	16.8767	30.5048	12.5897	6.93343	603.253	43.0894	297.887	15.0826	7.21271	4.88321	15.4869	7.7446	0	28.0688	4.52853	0.39724	5.37406	0	9.99607	2.0741	3.62215	0.198175	0.547742	-0.199346	0.505188	-0.00528183	1	-1.89072	0.0193474	-0.125971	0.748739
PARD3B	9.91218	11.9502	8.71319	12.2529	15.189	26.1469	8.39317	5.77786	476.706	5.1123	262.756	16.3395	12.7283	10.9872	20.6491	13.7682	0	9.90663	9.05705	8.34205	0	1.58233	19.9921	7.77789	10.8664	0.0752813	0.891241	-0.110759	0.925091	-0.011437	1	-2.16419	0.0106904	-0.176228	0.589846
PARD6G	0	14.3403	16.6343	18.0876	13.5014	2.17891	0	2.31114	112.046	0	46.5065	0	15.274	1.2208	21.2944	11.1866	0	1.6511	19.2462	15.8896	0	0	4.99804	1.03705	7.24429	-0.135062	NA	-0.0819413	0.955992	-0.00975959	1	-1.96856	0.0188978	-0.756015	0.0468982
PAWR	33.0406	39.4357	57.8239	44.9271	40.5041	47.9361	25.1795	24.267	156.745	24.1009	110.188	38.9635	49.6404	35.4033	36.7813	53.3517	0	11.5577	83.7777	83.4205	11.4199	6.32932	46.6483	11.9261	28.9772	-0.649934	0.152072	0.0341894	1	-0.0720917	0.599138	-1.33638	0.00909609	-0.805893	0.049789
PBX1	29.7365	25.0955	4.75265	2.91735	30.3781	93.6932	33.5727	5.77786	1766.02	8.03362	565.105	11.312	7.63699	21.9745	10.3246	14.6287	48.8691	28.0688	7.92492	2.38344	9.4046	0	23.3242	15.0373	14.4886	0.275879	0.392159	-0.17477	0.650785	-0.00251012	1	-1.58833	0.027082	-0.0630749	1
PEG10	185.027	88.4316	5.54476	6.41816	52.3178	326.837	58.7522	20.8003	1581.59	3.65164	731.502	31.4221	16.5468	26.8577	13.551	22.3733	136.834	179.97	15.2838	19.862	8.73284	12.6586	4.99804	1.55558	3.62215	-0.185015	0.646475	-1.46348	0.0185678	-0.0302501	0.754648	-3.56112	0.000351698	-1.05709	0.0250348
PFN2	85.9056	33.4606	0	1.16694	38.8164	69.7252	16.7863	2.31114	435.722	0.730329	119.891	1.25689	0	3.66241	1.29057	2.58153	68.4168	54.4865	0	0	0.671757	0	1.66601	0	0	0.117471	0.645012	-4.23378	0.00732372	-0.0146089	1	-4.37375	0.000603634	-2.53262	0.00704721
PHLDB2	26.4325	33.4606	30.1001	32.6743	21.9397	10.8946	16.7863	25.4226	248.899	17.5279	182.457	21.3671	21.2139	15.8704	14.8416	23.2338	58.643	9.90663	37.9264	21.8482	5.37406	0	21.6582	9.852	48.899	-0.42767	0.326557	-0.447902	0.162516	-0.0190628	1	-0.80029	0.0600081	-1.15885	0.0147912
PIEZO2	9.91218	11.9502	17.4264	12.8363	8.43836	15.2524	8.39317	6.93343	1190.33	8.03362	1066.3	7.54131	9.75837	12.208	11.6151	12.9077	19.5477	33.0221	22.6426	8.34205	0	1.58233	1.66601	4.66673	5.43322	-0.3433	0.33285	-4.44634	0.00108536	-0.0635632	0.378378	-3.48359	0.000471138	-1.44301	0.0125718
PIKFYVE	446.048	524.615	739.829	651.735	494.488	599.201	906.462	767.299	492.045	390.726	514.249	692.544	549.015	603.077	368.458	635.917	557.108	534.958	773.246	1030.44	603.238	517.422	446.491	543.934	581.355	-1.07333	0.00316142	-0.033494	1	-0.00321418	1	0.0174119	0.965397	-0.0521099	1
PLEKHG1	59.4731	94.4067	186.938	142.367	146.827	69.7252	71.3419	108.624	331.226	53.314	234.094	217.441	196.865	95.2226	119.378	234.919	48.8691	132.088	334.545	312.231	45.0077	33.2289	53.3124	38.3709	114.098	-1.29442	0.00402932	-0.587139	0.0851364	-0.516536	0.0458218	-1.12548	0.00711156	-0.992972	0.0121119
PLS3	66.0812	58.5561	19.0106	29.7569	33.7534	91.5143	37.7692	17.3336	1529.7	5.84263	582.168	10.0551	16.9711	15.8704	17.4227	32.6994	68.4168	47.882	5.66066	14.6979	12.7634	1.58233	8.33006	12.9632	5.43322	0.0657432	0.908266	-0.462624	0.13761	-0.00894159	1	-2.85503	0.00221499	-0.719527	0.0585344
PLXNB1	39.6487	19.1204	29.308	26.8396	48.9425	30.5048	33.5727	12.7113	118.877	20.4492	387.108	12.5689	29.2751	21.9745	58.0757	18.9312	9.77383	39.6265	41.8889	25.0261	7.38933	0	21.6582	24.8893	32.5993	0.0341319	0.969135	-0.377694	0.26511	-0.0102546	1	-1.5953	0.00880786	-0.289043	0.406222
POC5	29.7365	44.2158	46.7344	32.0908	37.1288	41.3993	75.5385	88.979	28.7606	24.1009	28.2162	32.679	55.5803	50.0529	23.2303	37.002	58.643	100.717	58.8708	70.7088	49.0383	55.3815	18.3261	28.0004	43.4658	-1.1163	0.0123351	-0.31586	0.571645	-0.00571762	1	0.0783114	0.81583	-0.0190195	1
PPA1	389.879	378.822	358.033	291.151	194.082	298.511	100.718	177.958	183.349	93.4821	262.087	120.661	249.475	136.73	192.94	419.929	107.512	175.017	276.24	322.162	102.107	143.992	84.9666	168.521	211.896	-0.435812	0.402811	-0.0432306	1	-0.0179027	1	-0.176941	0.518019	-1.12118	0.00322303
PTPRD	16.5203	7.17013	2.37633	4.66776	8.43836	26.1469	20.9829	4.62229	456.454	5.84263	353.427	10.0551	5.5156	4.88321	0.645286	1.72102	0	4.95331	5.66066	0.794481	3.35878	1.58233	3.33202	1.55558	5.43322	-0.0275455	0.963265	-0.063456	1	-0.000938555	1	-2.3522	0.00878078	-0.202911	0.465898
PTPRG	46.2568	17.9253	4.75265	12.2529	18.5644	50.115	4.19658	6.93343	262.32	0.730329	248.704	2.51377	2.96994	4.88321	5.80757	1.72102	9.77383	28.0688	1.6982	2.38344	2.68703	0	0	1.55558	7.24429	0.103572	0.843233	-1.31378	0.018484	-0.00630456	1	-3.73702	1.39e-05	-3.34863	0.000175393
PTPRK	19.8244	34.6556	57.8239	61.2643	64.1315	65.3674	25.1795	27.7337	202.283	9.49428	195.171	43.991	47.519	39.0657	29.6831	44.7466	48.8691	42.9287	82.6456	79.0509	12.7634	1.58233	38.3183	18.1484	41.6547	-0.466097	0.328765	-0.609948	0.0777865	-0.0255172	1	-2.01818	0.00133706	-0.657166	0.090388
PTPRS	62.7772	241.394	126.737	138.866	254.838	169.955	495.197	256.537	304.622	441.119	353.65	822.003	184.985	175.796	343.292	224.593	498.465	690.162	378.698	72.2978	46.3512	68.0401	144.943	73.1122	188.352	-0.497283	0.269215	-2.23672	0.000871733	-0.0848447	0.406129	-0.7224	0.0594943	-0.154652	0.780123
PUM3	102.426	88.4316	174.264	132.448	75.9452	74.083	134.291	127.113	115.881	65.7296	105.616	91.7527	154.013	113.535	59.3663	108.424	97.7383	153.553	138.686	189.086	83.9696	93.3574	103.293	94.3717	115.909	-1.11138	0.00543409	-0.367384	0.437704	-0.00541661	1	0.0763234	0.816177	-0.177279	0.604712
PXDN	161.899	66.9212	36.437	36.1751	64.1315	200.46	100.718	16.178	561.07	7.30329	588.079	23.8808	35.6393	17.0912	13.551	5.16306	68.4168	104.02	59.4369	127.911	8.06108	7.91164	28.3222	4.66673	10.8664	-0.460345	0.254041	-1.02835	0.0239671	-0.0019235	1	-3.29214	3.25e-05	-2.30105	0.000682745
PYCR1	29.7365	19.1204	28.5159	16.3371	15.189	37.0415	0	11.5557	263.279	8.03362	67.1389	6.28443	26.3052	8.54562	14.8416	19.7917	48.8691	29.7199	26.6051	36.9434	2.01527	3.16466	11.6621	28.0004	16.2997	-0.010373	0.99016	-0.52574	0.109591	-0.000803871	1	-1.12789	0.0420633	-0.340057	0.267521
RAI14	52.865	25.0955	6.33687	12.8363	32.0658	61.0095	8.39317	5.77786	1600.64	2.92132	549.714	6.28443	5.09133	8.54562	3.87171	17.2102	0	56.1376	7.92492	13.1089	2.01527	1.58233	11.6621	14.5187	9.05537	0.0841012	0.847614	-0.226218	0.421301	-0.00219917	1	-1.57316	0.0285552	-0.252423	0.322729
RALGPS2	42.9528	137.428	173.472	142.367	121.512	159.061	251.795	147.913	129.183	36.5164	167.29	224.983	128.98	142.834	91.6306	230.617	87.9644	69.3464	260.39	488.606	88.0002	64.8755	88.2986	56.0008	108.664	-1.60689	0.000657365	-0.0232078	1	-0.139362	0.390944	-0.248097	0.353606	-0.187256	0.651289
RARRES2	3.30406	5.97511	9.5053	21.0049	13.5014	4.35782	12.5897	1.15557	154.947	8.03362	188.145	2.51377	6.78843	0	4.517	7.7446	0	13.2088	7.92492	8.34205	0	0	6.66405	11.4076	0	-0.00989305	0.987219	-0.310482	0.233131	0.000755385	1	-2.72067	0.0078686	-0.196159	0.399304
RASGRP3	148.683	199.569	366.746	331.994	180.581	198.281	163.667	305.071	241.948	147.526	288.854	301.653	434.884	190.445	258.76	349.367	244.346	274.083	401.907	591.491	110.168	166.145	163.269	284.152	115.909	-1.02495	0.0107178	-0.583266	0.0633506	-0.0318421	1	-0.380541	0.11066	-0.337406	0.197622
RBMS3	6.60812	17.9253	13.4658	4.66776	3.37534	13.0735	12.5897	16.178	648.79	12.4156	326.549	21.3671	18.2439	9.76643	14.1963	15.4892	9.77383	21.4644	22.0766	9.53377	4.7023	0	3.33202	2.0741	14.4886	-0.441296	0.210684	-0.435455	0.1497	-0.0587171	0.394083	-1.76771	0.0182239	-0.458022	0.138951
RBPMS	9.91218	19.1204	3.16843	10.5025	8.43836	21.7891	4.19658	15.0224	374.367	2.92132	292.98	3.77066	0.848554	8.54562	1.93586	6.02358	0	24.7666	14.7177	9.53377	1.34351	1.58233	0	3.62968	1.81107	-0.416576	0.18757	-0.364103	0.195643	-0.0121192	1	-2.46394	0.008017	-0.713473	0.0535727
RELN	19.8244	5.97511	57.0318	44.9271	15.189	2.17891	0	6.93343	68.4261	0.730329	36.023	1.25689	11.0312	4.88321	14.8416	21.5128	0	3.30221	73.5885	34.1627	0	0	3.33202	22.8151	18.1107	-0.262848	0.492491	-0.0982144	0.937476	-0.0060779	1	-0.765695	0.0870267	-1.38927	0.0121119
RHOJ	6.60812	0	0	0	0	4.35782	0	0	437.999	0	206.659	0	0	0	0	0	0	3.30221	0	0	0	0	0	0	0	0	1	-2.00677	0.125562	0	1	-2.83838	0.0143069	-21.8376	0.00104251
RNF213-AS1	3.30406	3.58507	4.75265	4.66776	10.126	6.53674	16.7863	4.62229	22.4093	25.5615	23.8667	10.0551	16.1225	3.66241	20.0039	10.3261	58.643	36.3243	8.49099	2.38344	2.68703	3.16466	9.99607	7.25936	12.6775	0.230886	NA	-2.75858	0.00135041	-0.00574884	1	-0.287708	0.288429	0.0577074	1
ROS1	6.60812	0	0	0	0	0	0	0	106.055	0	194.948	0	0	0	0	0	0	0	0	0	0	0	0	0	0	0	NA	0	1	0	1	-0.644933	0.047403	-28.2761	7.2e-06
SALL2	39.6487	16.7303	6.33687	5.25123	6.75069	54.4728	12.5897	4.62229	288.085	0.730329	101.824	8.7982	6.78843	7.32482	6.45286	4.30255	0	26.4177	9.05705	2.78068	1.34351	0	3.33202	0.518526	10.8664	-0.163754	0.672971	-0.358723	0.199459	-0.015243	1	-3.10672	0.00245572	-1.17203	0.0206617
SEMA3F	6.60812	2.39004	2.37633	0.583469	3.37534	10.8946	4.19658	1.15557	66.0294	2.19099	136.062	3.77066	0	0	2.58114	0.860511	0	8.25552	1.13213	0.794481	0	0	0	0	0	-0.0735783	NA	-0.519097	0.129733	-0.00640156	1	-3.36884	0.00336331	-0.394887	0.110056
SERPINE2	502.217	210.324	19.8027	14.0033	143.452	470.645	88.1282	36.9783	61.1162	6.57296	36.1346	5.02754	15.274	28.0785	14.1963	23.2338	273.667	293.897	11.3213	7.15033	18.8092	9.49397	9.99607	6.22231	18.1107	0.105728	0.844696	-0.985777	0.0299742	-0.00772301	1	-2.09202	0.00870592	-1.4793	0.00813817
SERPINF1	201.548	270.075	88.7162	120.195	155.266	220.07	243.402	182.58	181.191	73.7632	190.71	187.276	95.0381	142.834	136.155	188.452	439.822	645.582	126.233	73.8867	77.252	113.928	169.933	90.2235	150.319	-0.130534	0.859404	-1.40353	0.0010989	-0.0152871	1	-0.150288	0.589519	-0.142394	0.820294
SFRP1	36.3447	19.1204	0.792109	0.583469	6.75069	58.8306	12.5897	8.089	49.4921	0.730329	12.491	0	0	6.10402	0	0.860511	19.5477	42.9287	0	0	1.34351	1.58233	0	0	0	0.0372258	NA	-0.533823	0.114025	-0.00716371	1	-1.94196	0.0193167	-0.546173	0.0736393
SFXN1	171.811	167.303	329.517	269.563	135.014	135.093	67.1453	139.824	128.104	51.8534	101.043	47.7617	224.443	107.431	166.484	242.664	97.7383	84.2063	258.126	330.107	78.5956	90.1927	59.9764	104.224	191.974	-0.689419	0.145782	-0.0503311	1	-0.0209341	1	-0.153348	0.58289	-1.00755	0.00626644
SGCB	75.9934	51.386	68.1213	50.7618	37.1288	45.7572	29.3761	30.0449	106.534	1.46066	67.2505	5.02754	18.6682	31.7409	14.8416	37.8625	29.3215	4.95331	39.0585	57.5999	15.4504	31.6466	18.3261	6.22231	30.7882	-0.555969	0.212248	0.0940591	1	-0.0171076	1	-0.298917	0.274827	-1.19271	0.0090232
SH3RF3	39.6487	26.2905	23.7633	19.838	60.7562	61.0095	58.7522	34.6671	254.291	22.6402	174.873	16.3395	14.8497	28.0785	32.2643	19.7917	19.5477	52.8354	42.4549	26.2179	9.4046	6.32932	53.3124	31.6301	30.7882	0.012016	0.99016	-0.279145	0.511912	-0.0026133	1	-1.53209	0.00986307	-0.0742091	1
SIGLEC6	6.60812	13.1452	21.3869	15.7537	25.3151	15.2524	83.9317	25.4226	17.9753	30.6738	7.91838	21.3671	31.3965	29.2993	18.7133	17.2102	234.572	61.0909	24.3408	34.9572	21.4962	6.32932	23.3242	13.4817	27.1661	-0.467173	0.308867	-2.45076	0.000503228	-0.0106536	1	-0.0761933	0.811856	0.0297167	1
SIX5	16.5203	10.7552	11.8816	12.2529	11.8137	34.8626	16.7863	2.31114	219.659	18.9886	107.623	7.54131	7.21271	2.44161	5.80757	2.58153	19.5477	6.60442	7.92492	8.34205	2.68703	9.49397	11.6621	7.25936	3.62215	0.207524	0.631709	-0.10091	1	0.00839757	1	-1.37448	0.029256	-0.13356	0.802413
SLC16A2	26.4325	11.9502	0.792109	0	6.75069	32.6837	0	3.46671	166.212	0	68.9234	0	0	1.2208	2.58114	0.860511	0	19.8133	1.13213	0	0	0	1.66601	0.518526	0	0.0749424	NA	-0.183819	0.429367	-0.00179867	1	-1.36178	0.0296545	-0.210929	0.252464
SLC25A23	26.4325	63.3362	36.437	28.59	23.6274	87.1565	8.39317	16.178	433.086	9.49428	151.453	31.4221	44.5491	18.312	47.7511	58.5147	9.77383	9.90663	44.7192	69.1198	8.06108	7.91164	21.6582	9.852	45.2768	-0.282991	0.57246	0.00905416	1	-0.0378379	0.860199	-1.75513	0.00708882	-0.786485	0.0549049
SLC4A3	13.2162	11.9502	7.92109	5.83469	20.2521	10.8946	41.9658	11.5557	28.5209	56.9657	31.1159	41.4772	14.8497	18.312	35.4907	1.72102	117.286	70.9975	2.26426	2.78068	13.4351	3.16466	26.6562	1.03705	12.6775	0.336579	0.39165	-1.37574	0.0137366	-0.00965507	1	-0.2682	0.317341	-0.0362267	1
SLC9A3R2	33.0406	16.7303	4.75265	5.25123	18.5644	41.3993	62.9487	6.93343	881.99	53.314	481.237	37.7066	20.3653	15.8704	36.7813	20.6523	39.0953	23.1155	11.8874	2.78068	14.1069	4.74699	33.3202	3.62968	14.4886	0.215143	0.605541	-0.207657	0.594495	-0.0133934	1	-1.4405	0.0281141	-0.0837172	1
SLIT2	66.0812	23.9004	0.792109	0	3.37534	56.6517	4.19658	2.31114	719.493	2.19099	473.876	1.25689	1.69711	4.88321	3.87171	0	19.5477	46.2309	0	0.39724	1.34351	4.74699	0	1.03705	1.81107	0.169007	0.479996	-0.211253	0.428808	-0.00105042	1	-1.19136	0.0469113	-0.260284	0.242876
SMARCA1	23.1284	13.1452	1.58422	2.33388	10.126	50.115	12.5897	3.46671	511.578	12.4156	275.916	3.77066	2.96994	1.2208	3.87171	9.46562	29.3215	29.7199	1.13213	0.794481	10.7481	0	0	1.03705	7.24429	0.107278	0.766651	-0.280148	0.290896	-0.00762386	1	-1.72007	0.0239126	-0.147717	0.598852
SOX5	19.8244	4.78009	57.0318	38.509	13.5014	10.8946	20.9829	13.8669	82.6866	8.03362	81.8604	17.5964	55.5803	12.208	10.3246	15.4892	9.77383	23.1155	69.06	181.142	2.01527	3.16466	8.33006	7.77789	12.6775	-3.30808	0.000621368	-0.767643	0.0480968	-0.0293558	1	-1.34355	0.0223324	-1.40207	0.0064237
SOX7	3.30406	3.58507	8.71319	5.25123	6.75069	4.35782	4.19658	2.31114	152.671	2.92132	126.136	0	2.96994	3.66241	9.034	2.58153	0	0	3.96246	2.78068	1.34351	1.58233	4.99804	4.66673	3.62215	0.180874	0.664786	0.0320914	1	-0.00228028	1	-1.22669	0.0410264	-0.107761	0.885225
SPATS2	69.3853	74.0914	119.608	97.4394	48.9425	76.2619	67.1453	101.69	259.204	35.0558	134.835	93.0095	91.2196	62.261	56.7851	100.68	175.929	158.506	134.158	239.139	21.4962	33.2289	54.9784	79.3345	59.7654	-1.19994	0.00742125	-2.18139	1.94e-05	-0.0359249	1	-0.6727	0.036256	-0.724065	0.049789
SPEG	9.91218	7.17013	3.96054	4.66776	11.8137	15.2524	8.39317	0	100.542	0	156.36	1.25689	4.66705	4.88321	7.09814	6.02358	0	4.95331	3.96246	3.9724	0.671757	0	4.99804	1.55558	3.62215	0.00687133	0.992092	-0.102699	0.901646	-0.0106019	1	-1.85185	0.0198466	-0.242139	0.342325
SPRY4	36.3447	11.9502	3.16843	0	1.68767	30.5048	8.39317	0	254.052	0.730329	144.538	0	1.69711	0	0	1.72102	19.5477	18.1622	1.13213	0.794481	0	0	1.66601	1.03705	0	0.0151426	0.96896	-0.392559	0.191548	-0.000330961	1	-1.17833	0.0358487	-0.39071	0.10048
SPTBN1	862.36	1071.93	1181.03	904.378	958.597	808.377	411.265	380.183	8163.44	502.466	5496.92	833.315	1265.19	765.444	946.634	784.786	664.62	477.169	1449.13	1304.93	205.558	215.197	1031.26	309.042	1034.12	-0.34054	0.537504	-0.387109	0.355142	-0.0618692	0.788961	-1.53558	0.00144348	-1.19818	0.00301985
STC2	66.0812	34.6556	0	0	15.189	87.1565	12.5897	9.24457	19.4134	2.19099	21.6361	0	0.424277	3.66241	0.645286	0	29.3215	41.2776	0.566066	0	2.01527	6.32932	1.66601	0	0	0.0691748	0.845749	-0.259333	0.361044	-0.000240572	1	-1.58349	0.0282741	-0.313829	0.206922
STRBP	52.865	82.4565	169.511	156.37	62.4438	71.9041	125.897	129.424	83.1659	37.9771	64.0162	155.854	114.979	108.651	78.7248	160.916	156.381	97.4152	220.766	251.453	70.5345	90.1927	68.3065	74.6678	114.098	-1.42822	0.000977129	-0.336412	0.520701	-0.0434068	1	0.038805	0.921815	-0.171509	0.683767
SULF1	95.8178	26.2905	0	0	21.9397	76.2619	29.3761	8.089	155.067	0	66.6928	0	0	2.44161	0	0	29.3215	67.6953	0	0	2.01527	4.74699	0	0	0	0.0470283	0.880542	-0.257358	0.301741	-0.000293382	1	-1.35341	0.0362011	-0.251024	0.228619
SYNE2	888.792	1497.36	3196.95	2508.92	1228.62	350.805	415.462	785.789	1007.46	692.352	1421.63	824.517	2661.49	961.993	1375.1	2325.1	117.286	246.015	2505.41	3690.36	101.435	262.667	1339.47	482.748	1369.17	-0.654704	0.128605	0.128205	1	-0.0539975	0.669208	-0.25991	0.332419	-1.12839	0.0129999
SYNPO	151.987	149.378	241.593	168.623	205.896	63.1885	67.1453	55.4674	2288.14	147.526	840.798	170.936	155.285	100.106	221.333	383.788	87.9644	33.0221	286.995	191.073	20.8245	33.2289	91.6307	75.7048	99.609	-0.268618	0.618743	-0.206864	0.789542	-0.129477	0.250196	-2.14507	0.00123402	-1.39551	0.00364422
SYNPO2	66.0812	35.8507	47.5265	57.18	28.6904	63.1885	12.5897	25.4226	499.475	8.03362	141.081	10.0551	24.6081	14.6496	30.3284	38.723	29.3215	37.9754	32.8318	38.1351	3.35878	11.0763	16.6601	15.5558	19.9218	-0.175758	0.765015	-0.522867	0.116542	-0.0152871	1	-2.56323	0.000357625	-1.78751	0.00118918
TANC1	23.1284	11.9502	28.5159	22.7553	11.8137	19.6102	8.39317	23.1114	563.227	10.9549	550.383	13.8257	34.7907	9.76643	30.3284	22.3733	0	33.0221	32.8318	33.7654	2.01527	9.49397	13.3281	19.1855	25.355	-0.220922	0.653979	-0.262244	0.455921	-0.00784516	1	-1.14777	0.033918	-0.28086	0.38723
TCF4	489.001	636.947	619.429	557.213	514.74	845.418	1099.5	704.899	2307.32	327.187	1427.76	598.278	386.941	487.1	346.518	560.193	1114.22	795.832	693.43	995.485	352.001	329.124	281.556	247.337	434.658	-1.207	0.0048684	-1.24366	0.000246395	-0.117607	0.564886	-1.17531	0.00051496	-0.795479	0.0151476
TEAD1	69.3853	54.971	19.8027	8.16857	20.2521	71.9041	12.5897	6.93343	1004.7	0	407.183	5.02754	20.3653	3.66241	7.09814	9.46562	29.3215	74.2997	21.5105	10.3283	1.34351	1.58233	3.33202	0.518526	10.8664	-0.358333	0.293602	-4.72681	0.000481624	-0.02607	0.834817	-4.02345	3.28e-05	-4.37559	5.08e-05
TEAD3	19.8244	3.58507	5.54476	2.33388	1.68767	10.8946	4.19658	0	313.61	0	141.639	0	4.66705	0	3.87171	0	9.77383	4.95331	3.96246	7.94481	0	0	0	3.62968	0	0.0482336	0.874302	-0.185775	0.418913	0.00443637	1	-1.84271	0.0163675	-0.249062	0.193288
TENM2	59.4731	9.56018	1.58422	1.16694	6.75069	54.4728	8.39317	4.62229	6.59096	0	7.13769	1.25689	3.81849	1.2208	1.93586	0.860511	48.8691	44.5798	2.26426	0.794481	0	1.58233	3.33202	0	0	0.0152366	NA	-0.711335	0.0810097	-0.00124586	1	-1.29681	0.0398974	-0.31246	0.171271
TENM3	46.2568	28.6805	0.792109	0	16.8767	52.2939	20.9829	2.31114	116.48	0	59.7782	0	0.848554	1.2208	0	0	9.77383	59.4398	0.566066	3.57516	0.671757	4.74699	0	1.03705	0	-0.0993218	0.766651	-0.239838	0.361044	0.00263404	1	-1.22514	0.0448281	-0.278078	0.223249
TET1	66.0812	27.4855	53.8634	51.3453	23.6274	23.968	20.9829	53.1563	634.41	10.9549	243.574	12.5689	22.911	32.9617	33.5549	30.1179	9.77383	24.7666	40.7567	71.5033	17.4657	15.8233	13.3281	11.9261	52.5211	-0.582148	0.17629	-0.120247	1	-0.0277528	1	-0.727699	0.0614621	-1.08395	0.0168918
THSD1	0	4.78009	3.16843	4.66776	11.8137	6.53674	8.39317	2.31114	96.228	4.38197	133.497	12.5689	6.78843	2.44161	7.09814	4.30255	9.77383	9.90663	5.09459	6.75309	0.671757	0	3.33202	4.66673	1.81107	-0.0259303	0.969652	-0.371846	0.18757	-0.00386598	1	-2.4509	0.00821029	-0.0834149	0.986767
THSD4	23.1284	7.17013	0	0	0	0	8.39317	0	110.848	2.19099	113.645	0	0.848554	0	0	2.58153	0	3.30221	0	0.794481	0	0	0	0	0	-1.41341	NA	-1.02251	0.201003	-22.1965	0.00471356	-0.125232	0.271958	-17.6125	0.00301985
THY1	118.946	50.1909	0.792109	0	32.0658	154.703	20.9829	11.5557	465.082	0	211.231	0	0	9.76643	1.93586	0.860511	19.5477	72.6486	0.566066	1.58896	3.35878	4.74699	0	0	3.62215	-0.128456	0.738613	-0.534832	0.105717	-0.012496	1	-3.83939	0.000196276	-2.35819	0.00436119
TMEM178B	33.0406	9.56018	25.3475	15.7537	6.75069	17.4313	4.19658	3.46671	72.8601	0	29.666	0	11.8798	1.2208	10.3246	18.0707	0	6.60442	29.4354	27.4096	0	3.16466	4.99804	3.11116	5.43322	-0.270628	NA	-0.104569	0.91125	-0.00865839	1	-1.00749	0.0601314	-1.23346	0.0181506
TMEM204	6.60812	19.1204	15.8422	8.16857	40.5041	6.53674	4.19658	13.8669	125.708	1.46066	70.2617	12.5689	53.4589	18.312	67.755	61.9568	0	1.6511	23.7748	13.5062	0.671757	1.58233	26.6562	1.55558	21.7329	-0.117137	0.800065	0.0291087	1	-0.108045	0.242843	-1.17318	0.0453553	-0.181526	0.5579
TMEM47	46.2568	21.5104	0	0	10.126	58.8306	12.5897	2.31114	61.3558	0	33.5695	0	0	3.66241	0.645286	0	9.77383	18.1622	0	0	0	1.58233	0	0	0	0.0503305	NA	-0.135401	0.626858	-0.00387068	1	-1.04773	0.0473037	-0.225598	0.232713
TP63	9.91218	16.7303	31.6843	26.8396	11.8137	6.53674	20.9829	18.4891	37.0292	7.30329	27.2125	7.54131	20.3653	17.0912	21.2944	35.2809	19.5477	16.511	39.6246	74.284	2.68703	6.32932	9.99607	7.77789	10.8664	-1.97961	0.000657365	-0.437921	0.18757	-0.709158	0.0192287	-0.493926	0.12119	-1.03876	0.0176839
TPM2	247.805	87.2366	23.7633	35.0082	92.8219	252.754	125.897	27.7337	1098.65	132.19	692.579	95.5233	72.5514	61.0402	89.6947	54.2122	254.119	298.85	44.7192	17.8758	10.7481	9.49397	126.617	18.6669	41.6547	0.205502	0.6433	-1.95026	0.00774304	-0.0111861	1	-2.59866	0.00341168	-0.509948	0.128621
TRAF4	56.169	101.577	164.759	116.11	192.395	89.3354	167.863	104.001	123.551	208.144	102.27	204.872	219.776	122.08	187.133	179.847	146.607	135.391	311.336	197.031	32.9161	36.3936	133.281	56.0008	77.8762	-0.888698	0.0520003	-0.825204	0.0142463	-0.562269	0.0480717	-1.16046	0.00276745	-0.386654	0.23964
TRIM2	26.4325	37.0457	14.258	19.838	45.5671	54.4728	8.39317	20.8003	591.269	6.57296	287.961	8.7982	25.4566	26.8577	16.7774	18.0707	19.5477	28.0688	23.2087	22.2455	7.38933	6.32932	4.99804	6.22231	18.1107	-0.322863	0.511478	-0.411515	0.209773	-0.0467846	0.724691	-2.85563	2.55e-05	-1.32659	0.00700746
TTC39A	13.2162	15.5353	9.5053	7.00163	15.189	13.0735	41.9658	23.1114	8.26866	11.6853	13.7178	20.1102	8.48554	10.9872	13.551	18.9312	68.4168	39.6265	11.3213	1.9862	3.35878	1.58233	6.66405	12.4446	3.62215	-0.0764545	0.904343	-1.31841	0.0158679	-0.0161813	1	-0.356089	0.22654	-0.118227	0.883283
TXNDC5	261.021	284.415	560.813	488.947	232.899	263.648	310.547	153.691	356.751	168.706	374.506	287.827	381.849	174.575	173.582	223.733	302.989	160.157	597.765	2518.5	227.726	253.173	323.206	231.263	275.283	-1.12609	0.01217	-0.0310223	1	0.00499745	1	-0.031868	0.935732	-0.171892	0.709903
TYRO3	6.60812	5.97511	2.37633	1.75041	3.37534	39.2204	8.39317	5.77786	108.331	2.92132	83.4218	3.77066	4.66705	0	5.80757	0	9.77383	11.5577	5.09459	1.9862	2.68703	1.58233	9.99607	1.55558	5.43322	0.208575	NA	-0.131445	0.829275	0.00879189	1	-1.82161	0.0198466	-0.0223439	1
USP18	221.372	268.88	255.851	129.53	340.91	246.217	176.256	171.025	84.8436	421.4	181.677	361.983	616.475	145.276	436.858	387.23	195.477	629.071	290.958	74.284	51.7253	55.3815	93.2967	66.3713	48.899	-0.208544	0.725614	-1.59211	0.00316161	-0.199904	0.144727	-1.36287	0.0104109	-0.801301	0.0511138
VANGL2	16.5203	22.7054	11.8816	7.00163	8.43836	26.1469	8.39317	5.77786	121.154	6.57296	106.619	17.5964	14.4254	12.208	16.1321	23.2338	0	36.3243	22.0766	12.3145	2.01527	0	1.66601	1.55558	5.43322	-0.521239	0.135607	-1.27057	0.0233064	-0.672057	0.0393904	-2.6433	0.00426116	-1.7323	0.00704721
WASF3	9.91218	14.3403	0.792109	1.16694	1.68767	17.4313	8.39317	1.15557	195.212	1.46066	67.8081	2.51377	1.69711	8.54562	3.22643	0	0	9.90663	0.566066	1.9862	2.01527	0	0	0	0	-0.103624	NA	-0.1154	0.790854	-0.0115066	1	-1.14647	0.0486765	-0.302174	0.174627
YAP1	42.9528	26.2905	3.96054	3.50082	13.5014	61.0095	8.39317	5.77786	1427.72	5.1123	672.058	1.25689	1.27283	3.66241	0.645286	9.46562	78.1906	36.3243	2.26426	2.38344	0	0	0	0.518526	1.81107	-0.228305	0.42054	-7.58788	3.98e-05	-0.10143	0.328238	-5.55917	1.39e-05	-5.823	0.000190411
ZC3H8	29.7365	23.9004	73.6661	66.5155	23.6274	10.8946	50.359	36.9783	38.1077	13.8762	23.309	33.9359	54.7318	36.6241	21.9397	44.7466	9.77383	29.7199	48.6816	83.0233	12.0916	15.8233	54.9784	27.4819	43.4658	-1.0396	0.0224252	-0.149466	0.993802	-0.0259156	1	-0.00217765	0.996284	-0.311609	0.367486
ZCCHC7	99.1218	138.623	184.561	133.031	77.6329	91.5143	176.256	177.958	165.493	94.9428	75.7265	158.368	161.65	135.509	92.2758	153.171	175.929	193.179	185.67	216.496	140.397	94.9397	129.949	109.409	114.098	-1.03594	0.0123863	-0.434705	0.276889	-0.0119969	1	0.0391612	0.920053	-0.102719	0.958878
ZDBF2	26.4325	8.36515	50.695	40.2594	23.6274	13.0735	37.7692	12.7113	68.6658	5.84263	39.0343	5.02754	27.578	13.4288	14.8416	23.2338	9.77383	6.60442	51.512	101.296	5.37406	6.32932	9.99607	5.18526	18.1107	-1.25659	0.0057794	-0.0968049	1	-0.0397704	0.85961	-1.11108	0.0267651	-1.24187	0.00854749
ZEB1	95.8178	145.793	266.148	218.801	91.1343	52.2939	41.9658	117.868	1469.42	54.0443	608.711	61.5874	181.591	109.872	156.804	222.012	117.286	64.3931	200.387	307.067	37.6184	33.2289	93.2967	70.5195	121.342	-0.629935	0.164649	-0.384213	0.305411	-0.0977175	0.416497	-0.907565	0.0281399	-1.2863	0.00376444
ZFYVE9	16.5203	8.36515	15.0501	14.5867	8.43836	19.6102	0	3.46671	304.382	1.46066	145.096	0	7.21271	4.88321	7.74343	6.02358	9.77383	3.30221	25.473	23.4372	3.35878	4.74699	3.33202	5.70379	18.1107	-0.119281	0.82511	-0.0572488	1	-0.000255528	1	-1.18703	0.0350995	-0.438315	0.173835
ZNF33A	105.73	158.938	251.891	203.047	155.266	189.565	339.923	299.293	265.556	100.785	182.011	165.909	163.771	218.524	112.925	164.358	97.7383	115.577	219.633	391.679	176.672	161.398	169.933	158.15	237.251	-1.12416	0.00686518	0.259042	0.773225	-0.00542835	1	-0.038756	0.921402	-0.0324165	1
ZNF507	62.7772	88.4316	198.819	140.033	96.1973	47.9361	83.9317	110.935	259.324	48.2017	146.992	51.5323	114.131	78.1314	60.0116	103.261	39.0953	56.1376	196.991	226.427	36.2749	15.8233	58.3104	71.5566	117.72	-1.40702	0.00147157	-0.289407	0.638944	-0.0741782	0.765392	-0.736145	0.0231371	-1.14526	0.00141788
ZNF608	23.1284	57.3611	80.003	50.1784	54.0055	23.968	58.7522	61.2453	276.101	24.1009	288.519	94.2664	56.0046	29.2993	36.7813	63.6778	136.834	54.4865	114.911	114.405	25.5268	3.16466	24.9902	15.0373	43.4658	-1.02481	0.0193783	-1.97753	0.00145266	-0.0655219	0.614665	-1.38509	0.00986307	-1.04395	0.0176839
ZNF827	56.169	71.7013	159.214	133.615	75.9452	23.968	46.1624	77.4233	295.994	34.3255	156.806	42.7341	129.829	54.9361	72.272	77.446	29.3215	59.4398	217.935	243.508	13.4351	17.4056	84.9666	60.149	108.664	-1.06678	0.0182381	-0.35219	0.401352	-0.0279995	1	-0.63223	0.057772	-0.98761	0.0150037
ZNRF1	128.858	114.722	334.27	259.06	278.466	67.5463	54.5556	79.7344	188.861	79.6059	150.003	47.7617	248.626	80.573	368.458	294.295	29.3215	67.6953	245.106	238.344	20.1527	42.7229	129.949	172.669	81.4983	0.0354291	0.970276	-0.10264	1	-0.0171368	1	-1.32638	0.00696947	-0.719412	0.0680377
